# Supplementary material for: Prevalence of chronic conditions in masters games athletes: predictors and comparison to the general population
Source: PeerJ journal article supplement (doi:10.7717/peerj.18912), 2025-02-18
Supplement: Empty_copy_of_questionnaire_PPMG.pdf [file Empty_copy_of_questionnaire_PPMG.pdf]

# Survey to investigate the prevalence of nutrition-related chronic conditions in Australian Masters athletes

This is an online survey asking registered Pan Pacific Masters Games athletes about demographic information, health-related information including medical history and treatment strategies, history of engagement with physical activity, and sources of nutrition information. The physiological effects of the normal ageing process alongside age- or lifestyle-associated health conditions need to be taken into account when recommendations are provided for optimal athletic performance for Masters Athletes. This research will help to inform health professionals about education needs and advice for treatment and performance, and guide further research specific to Masters Athletes. Promotion of the health benefits Masters level activity may encourage others in this age-group to consider participation.

---

The study is a University of Sydney project being conducted by Dr Janelle Gifford, Mrs Wendy Stuart-Smith, Associate Professor Mike Climstein, Associate Professor Helen O'Connor, Ms Xiaojing Wu, and Professor Peter Raeburn. Contact email: [janelle.gifford@sydney.edu.au](mailto:janelle.gifford@sydney.edu.au)

---

By clicking the "Continue" button at the bottom of the screen, you are:

1. acknowledging that you have read the information sheet, which explains the aims of the study and have contacted the study researchers if you needed to clarify the details of the study;
2. acknowledging that you understand that you can withdraw from the study at any time without prejudice to your relationship to The University of Sydney;
3. agreeing that research data gathered from the results of the study may be published, provided that you cannot be identified;
4. acknowledging that you understand that if you have any questions relating to your participation in this research, and you may contact Dr Janelle Gifford at [janelle.gifford@sydney.edu.au](mailto:janelle.gifford@sydney.edu.au), who will be happy to answer them;
5. consenting to participate in the study described in the information sheet provided.

Please be assured that no information that can identify you will be kept, and that the information you enter will be securely held in confidence.

[Attachment: "Participant Information Sheet.pdf"]

---

## Consent to participate

- ☐ Choose not to participate
- ☐ CONTINUE (If you click continue, you are consenting to participate in the study described in the information sheet provided above.)
- 

If you click continue, you are consenting to participate in the study described in the information sheet provided.

[Attachment: "Participant Information Sheet.pdf"]

---

Have you already participated in this survey?\*

- ☐ Yes
- ☐ No
- (\*Participation includes completion of this survey at the Australian Masters Games (Tasmania) in 2017)

---

What is your age in years?

- ☐ < 18
- ☐ 18
- ☐ 19
- ☐ 20
- ☐ 21
- ☐ 22
- ☐ 23
- ☐ 24
- ☐ 25
- ☐ 26
- ☐ 27
- ☐ 28
- ☐ 29
- ☐ 30
- ☐ 31
- ☐ 32
- ☐ 33
- ☐ 34
- ☐ 35
- ☐ 36
- ☐ 37
- ☐ 38
- ☐ 39
- ☐ 40
- ☐ 41
- ☐ 42
- ☐ 43
- ☐ 44
- ☐ 45
- ☐ 46
- ☐ 47
- ☐ 48
- ☐ 49
- ☐ 50
- ☐ 51
- ☐ 52
- ☐ 53
- ☐ 54
- ☐ 55
- ☐ 56
- ☐ 57
- ☐ 58
- ☐ 59
- ☐ 60
- ☐ 61
- ☐ 62
- ☐ 63
- ☐ 64
- ☐ 65
- ☐ 66
- ☐ 67
- ☐ 68
- ☐ 69
- ☐ 70
- ☐ 71
- ☐ 72
- ☐ 73
- ☐ 74
- ☐ 75
- ☐ 76
- ☐ 77
- ☐ 78
- ☐ 79
- ☐ 80
- ☐ 81
- ☐ 82
- ☐ 83
- ☐ 84
- ☐ 85

- ☐ 86
- ☐ 87
- ☐ 88
- ☐ 89
- ☐ 90
- ☐ 91
- ☐ 92
- ☐ 93
- ☐ 94
- ☐ 95
- ☐ 96
- ☐ 97
- ☐ 98
- ☐ 99
- ☐ 100

---

Are you an athlete registered to participate in the Pan Pacific Masters Games?

- ☐ Yes  
☐ No

---

What is your gender?

- ☐ Male  
☐ Female

---

Do any of the following apply to you?

- 1. Currently pregnant
- 2. Currently breastfeeding
- 3. Currently experiencing menopause
- 4. Post menopause

- ☐ Yes   ☐ No

---

Are you pregnant or breastfeeding?

- ☐ Yes   ☐ No

---

Which of the following apply to you? (pregnant and breastfeeding can both be selected)  
(Tick all that apply)

- ☐ Currently pregnant   ☐ Currently breastfeeding

---

Which of the following apply to you?

- ☐ Currently experiencing menopause   ☐ Post menopause

---

How many weeks pregnant are you?

- ☐ < 12 weeks  
☐ 12 weeks  
☐ 13 weeks  
☐ 14 weeks  
☐ 15 weeks  
☐ 16 weeks  
☐ 17 weeks  
☐ 18 weeks  
☐ 19 weeks  
☐ 20 weeks  
☐ 21 weeks  
☐ 22 weeks  
☐ 23 weeks  
☐ 24 weeks  
☐ 25 weeks  
☐ 26 weeks  
☐ 27 weeks  
☐ 28 weeks  
☐ 29 weeks  
☐ 30 weeks  
☐ 31 weeks  
☐ 32 weeks  
☐ 33 weeks  
☐ 34 weeks  
☐ 35 weeks  
☐ 36 weeks  
☐ 37 weeks  
☐ 38 weeks  
☐ 39 weeks  
☐ 40 weeks  
☐ Don't know

---

Do you speak English at home?

- ☐ Yes  
☐ No

---

Are you Aboriginal or Torres Strait Islander origin?

- ☐ Yes  
☐ No

---

What is your ancestry?

(Select up to two (2) options)

(\*Up to two may be specified if no other options are ticked. Examples of "Other": Greek, Vietnamese, Hmong, Kurdish, Maori, Lebanese, Australian South East Islander)

- ☐ English  
☐ Irish  
☐ Scottish  
☐ Italian  
☐ German  
☐ Chinese  
☐ Australian  
☐ Other\*

---

Please specify your ancestry

---

---

Do you have another ancestry you need to specify?

- ☐ Yes  
☐ No

---

Please specify your ancestry

---

What is your current nationality?

- ☐ Afghanistan
- ☐ Albania
- ☐ Algeria
- ☐ Andorra
- ☐ Angola
- ☐ Antigua & Deps
- ☐ Argentina
- ☐ Armenia
- ☐ Australia
- ☐ Austria
- ☐ Azerbaijan
- ☐ Bahamas
- ☐ Bahrain
- ☐ Bangladesh
- ☐ Barbados
- ☐ Belarus
- ☐ Belgium
- ☐ Belize
- ☐ Benin
- ☐ Bhutan
- ☐ Bolivia
- ☐ Bosnia Herzegovina
- ☐ Botswana
- ☐ Brazil
- ☐ Brunei
- ☐ Bulgaria
- ☐ Burkina
- ☐ Burundi
- ☐ Cambodia
- ☐ Cameroon
- ☐ Canada
- ☐ Cape Verde
- ☐ Central African Rep
- ☐ Chad
- ☐ Chile
- ☐ China
- ☐ Colombia
- ☐ Comoros
- ☐ Congo
- ☐ Congo {Democratic Rep}
- ☐ Costa Rica
- ☐ Croatia
- ☐ Cuba
- ☐ Cyprus
- ☐ Czech Republic
- ☐ Denmark
- ☐ Djibouti
- ☐ Dominica
- ☐ Dominican Republic
- ☐ East Timor
- ☐ Ecuador
- ☐ Egypt
- ☐ El Salvador
- ☐ Equatorial Guinea
- ☐ Eritrea
- ☐ Estonia
- ☐ Ethiopia
- ☐ Fiji
- ☐ Finland
- ☐ France
- ☐ Gabon
- ☐ Gambia
- ☐ Georgia
- ☐ Germany
- ☐ Ghana
- ☐ Greece
- ☐ Grenada
- ☐ Guatemala
- ☐ Guinea

- ☐ Guinea-Bissau
- ☐ Guyana
- ☐ Haiti
- ☐ Honduras
- ☐ Hungary
- ☐ Iceland
- ☐ India
- ☐ Indonesia
- ☐ Iran
- ☐ Iraq
- ☐ Ireland {Republic}
- ☐ Israel
- ☐ Italy
- ☐ Ivory Coast
- ☐ Jamaica
- ☐ Japan
- ☐ Jordan
- ☐ Kazakhstan
- ☐ Kenya
- ☐ Kiribati
- ☐ Korea North
- ☐ Korea South
- ☐ Kosovo
- ☐ Kuwait
- ☐ Kyrgyzstan
- ☐ Laos
- ☐ Latvia
- ☐ Lebanon
- ☐ Lesotho
- ☐ Liberia
- ☐ Libya
- ☐ Liechtenstein
- ☐ Lithuania
- ☐ Luxembourg
- ☐ Macedonia
- ☐ Madagascar
- ☐ Malawi
- ☐ Malaysia
- ☐ Maldives
- ☐ Mali
- ☐ Malta
- ☐ Marshall Islands
- ☐ Mauritania
- ☐ Mauritius
- ☐ Mexico
- ☐ Micronesia
- ☐ Moldova
- ☐ Monaco
- ☐ Mongolia
- ☐ Montenegro
- ☐ Morocco
- ☐ Mozambique
- ☐ Myanmar {Burma}
- ☐ Namibia
- ☐ Nauru
- ☐ Nepal
- ☐ Netherlands
- ☐ New Zealand
- ☐ Nicaragua
- ☐ Niger
- ☐ Nigeria
- ☐ Norway
- ☐ Oman
- ☐ Pakistan
- ☐ Palau
- ☐ Panama
- ☐ Papua New Guinea
- ☐ Paraguay
- ☐ Peru
- ☐ Philippines
- ☐ Poland

- ☐ Portugal
- ☐ Qatar
- ☐ Romania
- ☐ Russian Federation
- ☐ Rwanda
- ☐ St Kitts & Nevis
- ☐ St Lucia
- ☐ Saint Vincent & the Grenadines
- ☐ Samoa
- ☐ San Marino
- ☐ Sao Tome & Principe
- ☐ Saudi Arabia
- ☐ Senegal
- ☐ Serbia
- ☐ Seychelles
- ☐ Sierra Leone
- ☐ Singapore
- ☐ Slovakia
- ☐ Slovenia
- ☐ Solomon Islands
- ☐ Somalia
- ☐ South Africa
- ☐ Spain
- ☐ Sri Lanka
- ☐ Sudan
- ☐ Suriname
- ☐ Swaziland
- ☐ Sweden
- ☐ Switzerland
- ☐ Syria
- ☐ Taiwan
- ☐ Tajikistan
- ☐ Tanzania
- ☐ Thailand
- ☐ Togo
- ☐ Tonga
- ☐ Trinidad & Tobago
- ☐ Tunisia
- ☐ Turkey
- ☐ Turkmenistan
- ☐ Tuvalu
- ☐ Uganda
- ☐ Ukraine
- ☐ United Arab Emirates
- ☐ United Kingdom
- ☐ United States
- ☐ Uruguay
- ☐ Uzbekistan
- ☐ Vanuatu
- ☐ Vatican City
- ☐ Venezuela
- ☐ Vietnam
- ☐ Yemen
- ☐ Zambia
- ☐ Zimbabwe

In which country do you live?

- ☐ Afghanistan
- ☐ Albania
- ☐ Algeria
- ☐ Andorra
- ☐ Angola
- ☐ Antigua & Deps
- ☐ Argentina
- ☐ Armenia
- ☐ Australia
- ☐ Austria
- ☐ Azerbaijan
- ☐ Bahamas
- ☐ Bahrain
- ☐ Bangladesh
- ☐ Barbados
- ☐ Belarus
- ☐ Belgium
- ☐ Belize
- ☐ Benin
- ☐ Bhutan
- ☐ Bolivia
- ☐ Bosnia Herzegovina
- ☐ Botswana
- ☐ Brazil
- ☐ Brunei
- ☐ Bulgaria
- ☐ Burkina
- ☐ Burundi
- ☐ Cambodia
- ☐ Cameroon
- ☐ Canada
- ☐ Cape Verde
- ☐ Central African Rep
- ☐ Chad
- ☐ Chile
- ☐ China
- ☐ Colombia
- ☐ Comoros
- ☐ Congo
- ☐ Congo {Democratic Rep}
- ☐ Costa Rica
- ☐ Croatia
- ☐ Cuba
- ☐ Cyprus
- ☐ Czech Republic
- ☐ Denmark
- ☐ Djibouti
- ☐ Dominica
- ☐ Dominican Republic
- ☐ East Timor
- ☐ Ecuador
- ☐ Egypt
- ☐ El Salvador
- ☐ Equatorial Guinea
- ☐ Eritrea
- ☐ Estonia
- ☐ Ethiopia
- ☐ Fiji
- ☐ Finland
- ☐ France
- ☐ Gabon
- ☐ Gambia
- ☐ Georgia
- ☐ Germany
- ☐ Ghana
- ☐ Greece
- ☐ Grenada
- ☐ Guatemala
- ☐ Guinea



- ☐ Guinea-Bissau
- ☐ Guyana
- ☐ Haiti
- ☐ Honduras
- ☐ Hungary
- ☐ Iceland
- ☐ India
- ☐ Indonesia
- ☐ Iran
- ☐ Iraq
- ☐ Ireland {Republic}
- ☐ Israel
- ☐ Italy
- ☐ Ivory Coast
- ☐ Jamaica
- ☐ Japan
- ☐ Jordan
- ☐ Kazakhstan
- ☐ Kenya
- ☐ Kiribati
- ☐ Korea North
- ☐ Korea South
- ☐ Kosovo
- ☐ Kuwait
- ☐ Kyrgyzstan
- ☐ Laos
- ☐ Latvia
- ☐ Lebanon
- ☐ Lesotho
- ☐ Liberia
- ☐ Libya
- ☐ Liechtenstein
- ☐ Lithuania
- ☐ Luxembourg
- ☐ Macedonia
- ☐ Madagascar
- ☐ Malawi
- ☐ Malaysia
- ☐ Maldives
- ☐ Mali
- ☐ Malta
- ☐ Marshall Islands
- ☐ Mauritania
- ☐ Mauritius
- ☐ Mexico
- ☐ Micronesia
- ☐ Moldova
- ☐ Monaco
- ☐ Mongolia
- ☐ Montenegro
- ☐ Morocco
- ☐ Mozambique
- ☐ Myanmar {Burma}
- ☐ Namibia
- ☐ Nauru
- ☐ Nepal
- ☐ Netherlands
- ☐ New Zealand
- ☐ Nicaragua
- ☐ Niger
- ☐ Nigeria
- ☐ Norway
- ☐ Oman
- ☐ Pakistan
- ☐ Palau
- ☐ Panama
- ☐ Papua New Guinea
- ☐ Paraguay
- ☐ Peru
- ☐ Philippines
- ☐ Poland

- ☐ Portugal
- ☐ Qatar
- ☐ Romania
- ☐ Russian Federation
- ☐ Rwanda
- ☐ St Kitts & Nevis
- ☐ St Lucia
- ☐ Saint Vincent & the Grenadines
- ☐ Samoa
- ☐ San Marino
- ☐ Sao Tome & Principe
- ☐ Saudi Arabia
- ☐ Senegal
- ☐ Serbia
- ☐ Seychelles
- ☐ Sierra Leone
- ☐ Singapore
- ☐ Slovakia
- ☐ Slovenia
- ☐ Solomon Islands
- ☐ Somalia
- ☐ South Africa
- ☐ Spain
- ☐ Sri Lanka
- ☐ Sudan
- ☐ Suriname
- ☐ Swaziland
- ☐ Sweden
- ☐ Switzerland
- ☐ Syria
- ☐ Taiwan
- ☐ Tajikistan
- ☐ Tanzania
- ☐ Thailand
- ☐ Togo
- ☐ Tonga
- ☐ Trinidad & Tobago
- ☐ Tunisia
- ☐ Turkey
- ☐ Turkmenistan
- ☐ Tuvalu
- ☐ Uganda
- ☐ Ukraine
- ☐ United Arab Emirates
- ☐ United Kingdom
- ☐ United States
- ☐ Uruguay
- ☐ Uzbekistan
- ☐ Vanuatu
- ☐ Vatican City
- ☐ Venezuela
- ☐ Vietnam
- ☐ Yemen
- ☐ Zambia
- ☐ Zimbabwe

---

How many years have you lived in [country\_live]?

- ☐ 1
- ☐ 2
- ☐ 3
- ☐ 4
- ☐ 5
- ☐ 6
- ☐ 7
- ☐ 8
- ☐ 9
- ☐ 10
- ☐ 11
- ☐ 12
- ☐ 13
- ☐ 14
- ☐ 15
- ☐ 16
- ☐ 17
- ☐ 18
- ☐ 19
- ☐ 20
- ☐ 21
- ☐ 22
- ☐ 23
- ☐ 24
- ☐ 25
- ☐ 26
- ☐ 27
- ☐ 28
- ☐ 29
- ☐ 30
- ☐ 31
- ☐ 32
- ☐ 33
- ☐ 34
- ☐ 35
- ☐ 36
- ☐ 37
- ☐ 38
- ☐ 39
- ☐ 40
- ☐ 41
- ☐ 42
- ☐ 43
- ☐ 44
- ☐ 45
- ☐ 46
- ☐ 47
- ☐ 48
- ☐ 49
- ☐ 50
- ☐ 51
- ☐ 52
- ☐ 53
- ☐ 54
- ☐ 55
- ☐ 56
- ☐ 57
- ☐ 58
- ☐ 59
- ☐ 60
- ☐ 61
- ☐ 62
- ☐ 63
- ☐ 64
- ☐ 65
- ☐ 66
- ☐ 67
- ☐ 68
- ☐ 69

- ☐ 70
- ☐ 71
- ☐ 72
- ☐ 73
- ☐ 74
- ☐ 75
- ☐ 76
- ☐ 77
- ☐ 78
- ☐ 79
- ☐ 80
- ☐ 81
- ☐ 82
- ☐ 83
- ☐ 84
- ☐ 85
- ☐ 86
- ☐ 87
- ☐ 88
- ☐ 89
- ☐ 90
- ☐ 91
- ☐ 92
- ☐ 93
- ☐ 94
- ☐ 95
- ☐ 96
- ☐ 97
- ☐ 98
- ☐ 99
- ☐ 100
- ☐ >100
- ☐ Don't know

---

In which state or territory of Australia do you currently live?

- ☐ ACT
- ☐ NSW
- ☐ NT
- ☐ Queensland
- ☐ SA
- ☐ Tasmania
- ☐ Victoria
- ☐ Western Australia
- ☐ Not currently living in Australia

---

How would you describe where you live?

- ☐ Major urban centre (population of 100,000 or more)
- ☐ Other urban centre (population between 1000 and 99,999)
- ☐ Bounded locality (population between 200 and 999)
- ☐ Rural (population < 200)

---

What is the highest year of primary or secondary school that you have completed?

- ☐ Year 12 or equivalent
- ☐ Year 11 or equivalent
- ☐ Year 10 or equivalent
- ☐ Year 9 or equivalent
- ☐ Year 8 or below
- ☐ Never attended school

---

Have you completed a trade certificate, diploma, degree or any other educational qualification?

- ☐ Yes
- ☐ No
- ☐ Don't know

---

What is the highest qualification that you have completed?

- ☐ Trade certificate
- ☐ Diploma
- ☐ Bachelors degree
- ☐ Graduate diploma or certificate
- ☐ Masters degree
- ☐ PhD
- ☐ Other

---

please specify the highest qualification you have completed

---

---

This question is about your employment. Are you currently....  
(More than one response is allowed)  
(Tick all that apply)

- ☐ Employed casually for wages
- ☐ Employed part-time for wages
- ☐ Employed full-time for wages
- ☐ Self-employed
- ☐ Unemployed
- ☐ A homemaker
- ☐ A student
- ☐ Retired
- ☐ Unable to work
- ☐ Other (please specify)

---

please specify your employment status

---

---

Before income tax, salary sacrifice or anything else is taken out, how much income in total do all members of your household (aged 15 years or over) usually receive from all sources? (amount is in Australian dollars)

- ☐ Prefer not to say
- ☐ Less than \$20,000
- ☐ \$20,001-\$40,000
- ☐ \$40,001-\$60,000
- ☐ \$60,001-\$80,000
- ☐ \$80,001-\$100,000
- ☐ \$100,001-\$120,000
- ☐ \$120,001-\$140,000
- ☐ \$140,001-\$160,000
- ☐ \$160,001-\$180,000
- ☐ More than \$180,000
- ☐ Don't Know

How long have you been competing in Masters level competition?

- ☐ Less than 1 year
- ☐ 1 year
- ☐ 2 years
- ☐ 3 years
- ☐ 4 years
- ☐ 5 years
- ☐ 6 years
- ☐ 7 years
- ☐ 8 years
- ☐ 9 years
- ☐ 10 years
- ☐ 11 years
- ☐ 12 years
- ☐ 13 years
- ☐ 14 years
- ☐ 15 years
- ☐ 16 years
- ☐ 17 years
- ☐ 18 years
- ☐ 19 years
- ☐ 20 years
- ☐ 21 years
- ☐ 22 years
- ☐ 23 years
- ☐ 24 years
- ☐ 25 years
- ☐ 26 years
- ☐ 27 years
- ☐ 28 years
- ☐ 29 years
- ☐ 30 years
- ☐ 31 years
- ☐ 32 years
- ☐ 33 years
- ☐ 34 years
- ☐ 35 years
- ☐ 36 years
- ☐ 37 years
- ☐ 38 years
- ☐ 39 years
- ☐ 40 years
- ☐ 41 years
- ☐ 42 years
- ☐ 43 years
- ☐ 44 years
- ☐ 45 years
- ☐ 46 years
- ☐ 47 years
- ☐ 48 years
- ☐ 49 years
- ☐ 50 years
- ☐ 51 years
- ☐ 52 years
- ☐ 53 years
- ☐ 54 years
- ☐ 55 years
- ☐ 56 years
- ☐ 57 years
- ☐ 58 years
- ☐ 59 years
- ☐ 60 years
- ☐ 61 years
- ☐ 62 years
- ☐ 63 years
- ☐ 64 years
- ☐ 65 years
- ☐ 66 years
- ☐ 67 years
- ☐ 68 years

- ☐ 69 years
- ☐ 70 years
- ☐ 71 years
- ☐ 72 years
- ☐ 73 years
- ☐ 74 years
- ☐ 75 years
- ☐ 76 years
- ☐ 77 years
- ☐ 78 years
- ☐ 79 years
- ☐ 80 years
- ☐ 81 years
- ☐ 82 years
- ☐ 83 years
- ☐ 84 years
- ☐ 85 years
- ☐ 86 years
- ☐ 87 years
- ☐ 88 years
- ☐ 89 years
- ☐ 90 years
- ☐ 91 years
- ☐ 92 years
- ☐ 93 years
- ☐ 94 years
- ☐ 95 years
- ☐ 96 years
- ☐ 97 years
- ☐ 98 years
- ☐ 99 years

---

What sport/s are you competing in at the Pan Pacific Masters Games?  
(Tick all that apply)

- ☐ Archery
- ☐ Athletics
- ☐ Baseball
- ☐ Basketball
- ☐ Beach volleyball
- ☐ Boxing
- ☐ Callisthenics
- ☐ Cricket - outdoor
- ☐ Cricket - indoor
- ☐ Diving
- ☐ Enduro/Vinduro
- ☐ Equestrian
- ☐ Fitness challenge
- ☐ Futsal
- ☐ Golf
- ☐ Hockey
- ☐ Judo
- ☐ Lawn bowls
- ☐ Mountain bike
- ☐ Netball - outdoor
- ☐ Netball - indoor
- ☐ Paddling - dragon boat
- ☐ Paddling - outrigger canoe
- ☐ Rowing - indoor
- ☐ Rugby league
- ☐ Rugby union
- ☐ Sailing
- ☐ Shooting clay target
- ☐ Soccer
- ☐ Softball
- ☐ Squash
- ☐ Swimming (including ocean swim)
- ☐ Table tennis
- ☐ Taekwondo
- ☐ Tennis
- ☐ Tenpin Bowling
- ☐ Touch football
- ☐ Volleyball

---

Which categories will you compete in athletics?  
(Tick all that apply)

- ☐ Sprints (60m, 100m, 200m, 400m), Hurdles (80m, 100m, 110m, 200m, 300m, 400m), Throws (shot put, hammer, javelin, discus, weight throw, throws pentathlon), Jumps (long jump, triple jump, high jump, pole vault)
- ☐ Middle Distance and Distance events (800m, 1500m, 5000m, 2000m steeplechase, 3000m steeplechase, 3000m race walk, 5000m race walk, 10km road race walk, beach mile, 5km road race, 4km cross country, 10.5km trail run)

---

Which categories will you compete in swimming?  
(Tick all that apply)

- ☐ 1500m or ocean swim
- ☐ other swimming events

---

Have you ever been an elite athlete? (elite athletes compete in non-Masters adult competition at state, national or international level)

- ☐ Yes
- ☐ No
- ☐ Don't know



**At which level did you compete in for each sport in elite competition? (select up to 5 sports)**  
**Please select the HIGHEST level you ever completed in your career.**

|                                         | State                 | National              | International         | Don't Know            |
|-----------------------------------------|-----------------------|-----------------------|-----------------------|-----------------------|
| AFL                                     | <input type="radio"/> | <input type="radio"/> | <input type="radio"/> | <input type="radio"/> |
| Archery                                 | <input type="radio"/> | <input type="radio"/> | <input type="radio"/> | <input type="radio"/> |
| Athletics                               | <input type="radio"/> | <input type="radio"/> | <input type="radio"/> | <input type="radio"/> |
| Badminton                               | <input type="radio"/> | <input type="radio"/> | <input type="radio"/> | <input type="radio"/> |
| Baseball                                | <input type="radio"/> | <input type="radio"/> | <input type="radio"/> | <input type="radio"/> |
| Basketball                              | <input type="radio"/> | <input type="radio"/> | <input type="radio"/> | <input type="radio"/> |
| Beach volleyball                        | <input type="radio"/> | <input type="radio"/> | <input type="radio"/> | <input type="radio"/> |
| BMX                                     | <input type="radio"/> | <input type="radio"/> | <input type="radio"/> | <input type="radio"/> |
| Bocce                                   | <input type="radio"/> | <input type="radio"/> | <input type="radio"/> | <input type="radio"/> |
| Boxing                                  | <input type="radio"/> | <input type="radio"/> | <input type="radio"/> | <input type="radio"/> |
| Callisthenics                           | <input type="radio"/> | <input type="radio"/> | <input type="radio"/> | <input type="radio"/> |
| Canoe/Kayak/SUP                         | <input type="radio"/> | <input type="radio"/> | <input type="radio"/> | <input type="radio"/> |
| Canoe/Paddling - outrigger              | <input type="radio"/> | <input type="radio"/> | <input type="radio"/> | <input type="radio"/> |
| Cricket - outdoor                       | <input type="radio"/> | <input type="radio"/> | <input type="radio"/> | <input type="radio"/> |
| Cricket - indoor                        | <input type="radio"/> | <input type="radio"/> | <input type="radio"/> | <input type="radio"/> |
| Croquet                                 | <input type="radio"/> | <input type="radio"/> | <input type="radio"/> | <input type="radio"/> |
| Cue sports                              | <input type="radio"/> | <input type="radio"/> | <input type="radio"/> | <input type="radio"/> |
| Cycling-track                           | <input type="radio"/> | <input type="radio"/> | <input type="radio"/> | <input type="radio"/> |
| Cycling-road                            | <input type="radio"/> | <input type="radio"/> | <input type="radio"/> | <input type="radio"/> |
| Darts                                   | <input type="radio"/> | <input type="radio"/> | <input type="radio"/> | <input type="radio"/> |
| Diving                                  | <input type="radio"/> | <input type="radio"/> | <input type="radio"/> | <input type="radio"/> |
| Dragon boat                             | <input type="radio"/> | <input type="radio"/> | <input type="radio"/> | <input type="radio"/> |
| Duathlon                                | <input type="radio"/> | <input type="radio"/> | <input type="radio"/> | <input type="radio"/> |
| Enduro/Vinduro                          | <input type="radio"/> | <input type="radio"/> | <input type="radio"/> | <input type="radio"/> |
| Equestrian                              | <input type="radio"/> | <input type="radio"/> | <input type="radio"/> | <input type="radio"/> |
| Fitness challenge                       | <input type="radio"/> | <input type="radio"/> | <input type="radio"/> | <input type="radio"/> |
| Fly fishing                             | <input type="radio"/> | <input type="radio"/> | <input type="radio"/> | <input type="radio"/> |
| Futsal                                  | <input type="radio"/> | <input type="radio"/> | <input type="radio"/> | <input type="radio"/> |
| Golf                                    | <input type="radio"/> | <input type="radio"/> | <input type="radio"/> | <input type="radio"/> |
| Gymnastics                              | <input type="radio"/> | <input type="radio"/> | <input type="radio"/> | <input type="radio"/> |
| Hockey                                  | <input type="radio"/> | <input type="radio"/> | <input type="radio"/> | <input type="radio"/> |
| Judo                                    | <input type="radio"/> | <input type="radio"/> | <input type="radio"/> | <input type="radio"/> |
| Karate                                  | <input type="radio"/> | <input type="radio"/> | <input type="radio"/> | <input type="radio"/> |
| Lawn bowls                              | <input type="radio"/> | <input type="radio"/> | <input type="radio"/> | <input type="radio"/> |
| Motorsport-hill climb                   | <input type="radio"/> | <input type="radio"/> | <input type="radio"/> | <input type="radio"/> |
| Mountain bike (including cross country) | <input type="radio"/> | <input type="radio"/> | <input type="radio"/> | <input type="radio"/> |

|                                    |                       |                       |                       |                       |
|------------------------------------|-----------------------|-----------------------|-----------------------|-----------------------|
| Netball - outdoor                  | <input type="radio"/> | <input type="radio"/> | <input type="radio"/> | <input type="radio"/> |
| Netball - indoor                   | <input type="radio"/> | <input type="radio"/> | <input type="radio"/> | <input type="radio"/> |
| Pool lifesaving                    | <input type="radio"/> | <input type="radio"/> | <input type="radio"/> | <input type="radio"/> |
| Powerlifting                       | <input type="radio"/> | <input type="radio"/> | <input type="radio"/> | <input type="radio"/> |
| Racquetball                        | <input type="radio"/> | <input type="radio"/> | <input type="radio"/> | <input type="radio"/> |
| Rowing-outdoor                     | <input type="radio"/> | <input type="radio"/> | <input type="radio"/> | <input type="radio"/> |
| Rowing-indoor                      | <input type="radio"/> | <input type="radio"/> | <input type="radio"/> | <input type="radio"/> |
| Rugby league                       | <input type="radio"/> | <input type="radio"/> | <input type="radio"/> | <input type="radio"/> |
| Rugby union                        | <input type="radio"/> | <input type="radio"/> | <input type="radio"/> | <input type="radio"/> |
| Sailing                            | <input type="radio"/> | <input type="radio"/> | <input type="radio"/> | <input type="radio"/> |
| Shooting - clay target             | <input type="radio"/> | <input type="radio"/> | <input type="radio"/> | <input type="radio"/> |
| Shooting - smallbore and air rifle | <input type="radio"/> | <input type="radio"/> | <input type="radio"/> | <input type="radio"/> |
| Shooting - field rifle             | <input type="radio"/> | <input type="radio"/> | <input type="radio"/> | <input type="radio"/> |
| Soccer                             | <input type="radio"/> | <input type="radio"/> | <input type="radio"/> | <input type="radio"/> |
| Softball                           | <input type="radio"/> | <input type="radio"/> | <input type="radio"/> | <input type="radio"/> |
| Squash                             | <input type="radio"/> | <input type="radio"/> | <input type="radio"/> | <input type="radio"/> |
| Swimming                           | <input type="radio"/> | <input type="radio"/> | <input type="radio"/> | <input type="radio"/> |
| Table tennis                       | <input type="radio"/> | <input type="radio"/> | <input type="radio"/> | <input type="radio"/> |
| Taekwondo                          | <input type="radio"/> | <input type="radio"/> | <input type="radio"/> | <input type="radio"/> |
| Tennis                             | <input type="radio"/> | <input type="radio"/> | <input type="radio"/> | <input type="radio"/> |
| Tenpin bowling                     | <input type="radio"/> | <input type="radio"/> | <input type="radio"/> | <input type="radio"/> |
| Touch football                     | <input type="radio"/> | <input type="radio"/> | <input type="radio"/> | <input type="radio"/> |
| Trail running                      | <input type="radio"/> | <input type="radio"/> | <input type="radio"/> | <input type="radio"/> |
| Volleyball                         | <input type="radio"/> | <input type="radio"/> | <input type="radio"/> | <input type="radio"/> |

---

Did you compete in a sport at an elite level that was not in the above list?

☐ Yes  
☐ No

---

please specify the other sport

---

---

Do you have a second other sport that was not listed?

☐ Yes  
☐ No

---

please specify the other sport

---

---

Do you have a third other sport that was not listed?

☐ Yes  
☐ No

---

please specify the other sport

---

---

Do you have a fourth other sport that was not listed?

☐ Yes  
☐ No

---

please specify the other sport

---

---

Do you have a fifth other sport that was not listed?

☐ Yes

☐ No

---

please specify the other sport

---

**At which level did you compete in elite competition for each of the other sports specified.  
Please select the HIGHEST level you ever completed in your career.**

|                    | State                 | National              | International         | Don't Know            |
|--------------------|-----------------------|-----------------------|-----------------------|-----------------------|
| [others_specify]   | <input type="radio"/> | <input type="radio"/> | <input type="radio"/> | <input type="radio"/> |
| [others_2_specify] | <input type="radio"/> | <input type="radio"/> | <input type="radio"/> | <input type="radio"/> |
| [others_3_specify] | <input type="radio"/> | <input type="radio"/> | <input type="radio"/> | <input type="radio"/> |
| [others_4_specify] | <input type="radio"/> | <input type="radio"/> | <input type="radio"/> | <input type="radio"/> |
| [others_5_specify] | <input type="radio"/> | <input type="radio"/> | <input type="radio"/> | <input type="radio"/> |

**These following four questions are to get an idea of your regular participation in \*organised, \*leisure time, \*occupational (work), or \*transport (active transport) activity across your adult years.**

**Did you participate in \*organised activity?**

**Please tick the box for each age group.**

**For example, if you know you regularly participated in organised activities during your 40s and 50s, but can't recall for your 20s and 30s, please tick the box "Yes" for 40-49 and 50-59. If you don't know for any of the age groups, please select "don't know"**

|                 | Yes                   | No                    | Don't know            |
|-----------------|-----------------------|-----------------------|-----------------------|
| 18-29 years old | <input type="radio"/> | <input type="radio"/> | <input type="radio"/> |
| 30-39 years old | <input type="radio"/> | <input type="radio"/> | <input type="radio"/> |
| 40-49 years old | <input type="radio"/> | <input type="radio"/> | <input type="radio"/> |
| 50-59 years old | <input type="radio"/> | <input type="radio"/> | <input type="radio"/> |
| 60-69 years old | <input type="radio"/> | <input type="radio"/> | <input type="radio"/> |
| 70-79 years old | <input type="radio"/> | <input type="radio"/> | <input type="radio"/> |
| 80-89 years old | <input type="radio"/> | <input type="radio"/> | <input type="radio"/> |
| 90-99 years old | <input type="radio"/> | <input type="radio"/> | <input type="radio"/> |

\*Organised activities are those that are governed by a set of rules and/or undertaken competitively at any level (e.g. competition tennis or golf).

**Did you participate in \*leisure-time activity?**

|                 | Yes                   | No                    | Don't know            |
|-----------------|-----------------------|-----------------------|-----------------------|
| 18-29 years old | <input type="radio"/> | <input type="radio"/> | <input type="radio"/> |
| 30-39 years old | <input type="radio"/> | <input type="radio"/> | <input type="radio"/> |
| 40-49 years old | <input type="radio"/> | <input type="radio"/> | <input type="radio"/> |
| 50-59 years old | <input type="radio"/> | <input type="radio"/> | <input type="radio"/> |
| 60-69 years old | <input type="radio"/> | <input type="radio"/> | <input type="radio"/> |
| 70-79 years old | <input type="radio"/> | <input type="radio"/> | <input type="radio"/> |
| 80-89 years old | <input type="radio"/> | <input type="radio"/> | <input type="radio"/> |
| 90-99 years old | <input type="radio"/> | <input type="radio"/> | <input type="radio"/> |

---

\*Leisure-time activities are other non-competitive activities (e.g. walking, gardening.)

**Did you participate in \*occupational activity?**

|                 | Yes                   | No                    | Don't know            |
|-----------------|-----------------------|-----------------------|-----------------------|
| 18-29 years old | <input type="radio"/> | <input type="radio"/> | <input type="radio"/> |
| 30-39 years old | <input type="radio"/> | <input type="radio"/> | <input type="radio"/> |
| 40-49 years old | <input type="radio"/> | <input type="radio"/> | <input type="radio"/> |
| 50-59 years old | <input type="radio"/> | <input type="radio"/> | <input type="radio"/> |
| 60-69 years old | <input type="radio"/> | <input type="radio"/> | <input type="radio"/> |
| 70-79 years old | <input type="radio"/> | <input type="radio"/> | <input type="radio"/> |
| 80-89 years old | <input type="radio"/> | <input type="radio"/> | <input type="radio"/> |
| 90-99 years old | <input type="radio"/> | <input type="radio"/> | <input type="radio"/> |

\*Occupational activities are non-sedentary activities undertaken at work (e.g. deliveries using cycling transport, housework such as vacuuming).

**Did you participate in \*transport activity?**

|                 | Yes                   | No                    | Don't know            |
|-----------------|-----------------------|-----------------------|-----------------------|
| 18-29 years old | <input type="radio"/> | <input type="radio"/> | <input type="radio"/> |
| 30-39 years old | <input type="radio"/> | <input type="radio"/> | <input type="radio"/> |
| 40-49 years old | <input type="radio"/> | <input type="radio"/> | <input type="radio"/> |
| 50-59 years old | <input type="radio"/> | <input type="radio"/> | <input type="radio"/> |
| 60-69 years old | <input type="radio"/> | <input type="radio"/> | <input type="radio"/> |
| 70-79 years old | <input type="radio"/> | <input type="radio"/> | <input type="radio"/> |
| 80-89 years old | <input type="radio"/> | <input type="radio"/> | <input type="radio"/> |
| 90-99 years old | <input type="radio"/> | <input type="radio"/> | <input type="radio"/> |

---

\*Transport activity is activity undertaken to get to/from somewhere (e.g. cycling to work).



**In the last 12 months, how many times a week (on average) have you done the following training?**

|                     | Daily                 | 5-6 times/week        | 3-4 times/week        | 1-2 times/week        | 0 times/week          |
|---------------------|-----------------------|-----------------------|-----------------------|-----------------------|-----------------------|
| Aerobic training    | <input type="radio"/> | <input type="radio"/> | <input type="radio"/> | <input type="radio"/> | <input type="radio"/> |
| Anaerobic training  | <input type="radio"/> | <input type="radio"/> | <input type="radio"/> | <input type="radio"/> | <input type="radio"/> |
| Resistance training | <input type="radio"/> | <input type="radio"/> | <input type="radio"/> | <input type="radio"/> | <input type="radio"/> |

\*Aerobic training increases heart rate and breathing for a sustained period of time, for example middle and long distance running/swimming/cycling, continuous dancing, and race walking.

\*Anaerobic exercise increases the heart rate and breathing for a short period of time, for example short distance running/swimming/cycling, throwing sports, jumping sports.

\*\*Resistance training uses an external resistance to assist with increasing muscle strength, tone, and size, for example using weights, tubes, body weight (e.g. pull-ups, push-ups).

Definitions based on information at

\*[https://www.medicinenet.com/aerobic\\_exercise/article.htm#what\\_is\\_aerobic\\_exercise](https://www.medicinenet.com/aerobic_exercise/article.htm#what_is_aerobic_exercise)

\*\*[https://www.emedicinehealth.com/strength\\_training/article\\_em.htm#how\\_does\\_resistance\\_exercise\\_work](https://www.emedicinehealth.com/strength_training/article_em.htm#how_does_resistance_exercise_work)

**In the last 12 months, how much time per week (on average) did you spend in the following training?**

|                     | < 1hour               | 1-2 hours/week        | 2-3 hours/week        | 3-4 hours/week        | >4 hours/week         |
|---------------------|-----------------------|-----------------------|-----------------------|-----------------------|-----------------------|
| Aerobic training    | <input type="radio"/> | <input type="radio"/> | <input type="radio"/> | <input type="radio"/> | <input type="radio"/> |
| Anaerobic training  | <input type="radio"/> | <input type="radio"/> | <input type="radio"/> | <input type="radio"/> | <input type="radio"/> |
| Resistance training | <input type="radio"/> | <input type="radio"/> | <input type="radio"/> | <input type="radio"/> | <input type="radio"/> |

\*Aerobic training increases heart rate and breathing for a sustained period of time, for example middle and long distance running/swimming/cycling, continuous dancing, and race walking.

\*Anaerobic exercise increases the heart rate and breathing for a short period of time, for example short distance running/swimming/cycling, throwing sports, jumping sports.

\*\*Resistance training uses an external resistance to assist with increasing muscle strength, tone, and size, for example using weights, tubes, body weight (e.g. pull-ups, push-ups).

Definitions based on information at

\*[https://www.medicinenet.com/aerobic\\_exercise/article.htm#what\\_is\\_aerobic\\_exercise](https://www.medicinenet.com/aerobic_exercise/article.htm#what_is_aerobic_exercise)

\*\*[https://www.emedicinehealth.com/strength\\_training/article\\_em.htm#how\\_does\\_resistance\\_exercise\\_work](https://www.emedicinehealth.com/strength_training/article_em.htm#how_does_resistance_exercise_work)

Do you currently smoke tobacco?

- ☐ Yes. Daily  
☐ Yes. Less than daily  
☐ No. I am an ex-smoker  
☐ No. I have never smoked

On average, how many cigarettes do you smoke each week?

- ☐ 1
- ☐ 2
- ☐ 3
- ☐ 4
- ☐ 5
- ☐ 6
- ☐ 7
- ☐ 8
- ☐ 9
- ☐ 10
- ☐ 11
- ☐ 12
- ☐ 13
- ☐ 14
- ☐ 15
- ☐ 16
- ☐ 17
- ☐ 18
- ☐ 19
- ☐ 20
- ☐ 21
- ☐ 22
- ☐ 23
- ☐ 24
- ☐ 25
- ☐ 26
- ☐ 27
- ☐ 28
- ☐ 29
- ☐ 30
- ☐ 31
- ☐ 32
- ☐ 33
- ☐ 34
- ☐ 35
- ☐ 36
- ☐ 37
- ☐ 38
- ☐ 39
- ☐ 40
- ☐ 41
- ☐ 42
- ☐ 43
- ☐ 44
- ☐ 45
- ☐ 46
- ☐ 47
- ☐ 48
- ☐ 49
- ☐ 50
- ☐ 51
- ☐ 52
- ☐ 53
- ☐ 54
- ☐ 55
- ☐ 56
- ☐ 57
- ☐ 58
- ☐ 59
- ☐ 60
- ☐ 61
- ☐ 62
- ☐ 63
- ☐ 64
- ☐ 65
- ☐ 66
- ☐ 67
- ☐ 68
- ☐ 69

- ☐ 70
- ☐ 71
- ☐ 72
- ☐ 73
- ☐ 74
- ☐ 75
- ☐ 76
- ☐ 77
- ☐ 78
- ☐ 79
- ☐ 80
- ☐ 81
- ☐ 82
- ☐ 83
- ☐ 84
- ☐ 85
- ☐ 86
- ☐ 87
- ☐ 88
- ☐ 89
- ☐ 90
- ☐ 91
- ☐ 92
- ☐ 93
- ☐ 94
- ☐ 95
- ☐ 96
- ☐ 97
- ☐ 98
- ☐ 99
- ☐ 100
- ☐ >100
- ☐ Don't know

---

How long have you been smoking for?

- ☐ < 1 year
- ☐ 1-5 years
- ☐ 6-10 years
- ☐ >10 years
- ☐ Don't know

---

How long did you smoke for?

- ☐ < 1 year
- ☐ 1-5 years
- ☐ 6-10 years
- ☐ >10 years
- ☐ Don't know

---

Do you currently drink alcohol at least once per week?

- ☐ Yes
- ☐ No

---

On average how many \*standard drinks do you have per week?

- ☐ < 1
  - ☐ 1-4
  - ☐ 5-7
  - ☐ 7-10
  - ☐ 10-14
  - ☐ >14
  - ☐ Prefer not to say
  - ☐ Don't know
- (List of common standard drinks is shown below )

---

\*List of approximate number of common standard drinks:

Full strength 4.8% alc. vol:

285 ml glass - 1.1 standard drinks

375 ml bottle or can - 1.4 standard drinks

Mid strength 3.5% alc. vol:

285 ml glass - 0.8 standard drinks

375 ml bottle or can - 1 standard drink

Low strength 2.7% alc. vol:

285 ml glass - 0.6 standard drinks

375 ml bottle or can - 0.8 standard drinks

Red wine: 150 ml average restaurant serving - 1.5 standard drinks

White wine OR Champagne: 150 ml average restaurant serving - 1.4 standard drinks

Spirits: 30 ml nip - 1 standard drink

Full strength pre-mix spirits: 375 ml can - 1.5 standard drinks

---

Did you ever drink regularly, that is, at least once a week?

☐ Yes

☐ No

---

On average how many \*standard drinks did you have per week?

☐ 1-4

☐ 5-7

☐ 7-10

☐ 10-14

☐ >14

☐ Prefer not to say

☐ Don't know

(List of common standard drinks is shown below)

---

\*List of approximate number of common standard drinks:

Full strength 4.8% alc. vol:

285 ml glass - 1.1 standard drinks

375 ml bottle or can - 1.4 standard drinks

Mid strength 3.5% alc. vol:

285 ml glass - 0.8 standard drinks

375 ml bottle or can - 1 standard drink

Low strength 2.7% alc. vol:

285 ml glass - 0.6 standard drinks

375 ml bottle or can - 0.8 standard drinks

Red wine: 150 ml average restaurant serving - 1.5 standard drinks

White wine OR Champagne: 150 ml average restaurant serving - 1.4 standard drinks

Spirits: 30 ml nip - 1 standard drink

Full strength pre-mix spirits: 375 ml can - 1.5 standard drinks

What is your current height in cm? (an approximate height is OK if you don't know exactly)

- ☐ < 140
- ☐ 140
- ☐ 141
- ☐ 142
- ☐ 143
- ☐ 144
- ☐ 145
- ☐ 146
- ☐ 147
- ☐ 148
- ☐ 149
- ☐ 150
- ☐ 151
- ☐ 152
- ☐ 153
- ☐ 154
- ☐ 155
- ☐ 156
- ☐ 157
- ☐ 158
- ☐ 159
- ☐ 160
- ☐ 161
- ☐ 162
- ☐ 163
- ☐ 164
- ☐ 165
- ☐ 166
- ☐ 167
- ☐ 168
- ☐ 169
- ☐ 170
- ☐ 171
- ☐ 172
- ☐ 173
- ☐ 174
- ☐ 175
- ☐ 176
- ☐ 177
- ☐ 178
- ☐ 179
- ☐ 180
- ☐ 181
- ☐ 182
- ☐ 183
- ☐ 184
- ☐ 185
- ☐ 186
- ☐ 187
- ☐ 188
- ☐ 189
- ☐ 190
- ☐ 191
- ☐ 192
- ☐ 193
- ☐ 194
- ☐ 195
- ☐ 196
- ☐ 197
- ☐ 198
- ☐ 199
- ☐ 200
- ☐ 201
- ☐ 202
- ☐ 203
- ☐ 204
- ☐ 205
- ☐ 206
- ☐ 207

- ☐ 208
- ☐ 209
- ☐ 210
- ☐ Don't know

---

Do you consider yourself to be an acceptable weight, underweight or overweight?

- ☐ acceptable weight
- ☐ underweight
- ☐ overweight
- ☐ don't Know

---

How is your [weight] condition treated?  
(Tick all that apply)

- ☐ no treatment   ☐ diet   ☐ exercise   ☐ natural/herbal therapy (please specify)   ☐ supplements (please specify)   ☐ other (please specify)   ☐ Don't know

---

Please specify the natural/herbal therapy

\_\_\_\_\_

---

Please specify the supplements

\_\_\_\_\_

---

Please specify the treatment

\_\_\_\_\_

What is your current weight in kg? (an approximate weight is OK if you don't know exactly)

- ☐ < 40
- ☐ 40
- ☐ 41
- ☐ 42
- ☐ 43
- ☐ 44
- ☐ 45
- ☐ 46
- ☐ 47
- ☐ 48
- ☐ 49
- ☐ 50
- ☐ 51
- ☐ 52
- ☐ 53
- ☐ 54
- ☐ 55
- ☐ 56
- ☐ 57
- ☐ 58
- ☐ 59
- ☐ 60
- ☐ 61
- ☐ 62
- ☐ 63
- ☐ 64
- ☐ 65
- ☐ 66
- ☐ 67
- ☐ 68
- ☐ 69
- ☐ 70
- ☐ 71
- ☐ 72
- ☐ 73
- ☐ 74
- ☐ 75
- ☐ 76
- ☐ 77
- ☐ 78
- ☐ 79
- ☐ 80
- ☐ 81
- ☐ 82
- ☐ 83
- ☐ 84
- ☐ 85
- ☐ 86
- ☐ 87
- ☐ 88
- ☐ 89
- ☐ 90
- ☐ 91
- ☐ 92
- ☐ 93
- ☐ 94
- ☐ 95
- ☐ 96
- ☐ 97
- ☐ 98
- ☐ 99
- ☐ 100
- ☐ 101
- ☐ 102
- ☐ 103
- ☐ 104
- ☐ 105
- ☐ 106
- ☐ 107



- ☐ 108
- ☐ 109
- ☐ 110
- ☐ 111
- ☐ 112
- ☐ 113
- ☐ 114
- ☐ 115
- ☐ 116
- ☐ 117
- ☐ 118
- ☐ 119
- ☐ 120
- ☐ 121
- ☐ 122
- ☐ 123
- ☐ 124
- ☐ 125
- ☐ 126
- ☐ 127
- ☐ 128
- ☐ 129
- ☐ 130
- ☐ 131
- ☐ 132
- ☐ 133
- ☐ 134
- ☐ 135
- ☐ 136
- ☐ 137
- ☐ 138
- ☐ 139
- ☐ 140
- ☐ 141
- ☐ 142
- ☐ 143
- ☐ 144
- ☐ 145
- ☐ 146
- ☐ 147
- ☐ 148
- ☐ 149
- ☐ 150
- ☐ 151
- ☐ 152
- ☐ 153
- ☐ 154
- ☐ 155
- ☐ 156
- ☐ 157
- ☐ 158
- ☐ 159
- ☐ 160
- ☐ 161
- ☐ 162
- ☐ 163
- ☐ 164
- ☐ 165
- ☐ 166
- ☐ 167
- ☐ 168
- ☐ 169
- ☐ 170
- ☐ 171
- ☐ 172
- ☐ 173
- ☐ 174
- ☐ 175
- ☐ 176
- ☐ 177
- ☐ 178

- ☐ 179
- ☐ 180
- ☐ 181
- ☐ 182
- ☐ 183
- ☐ 184
- ☐ 185
- ☐ 186
- ☐ 187
- ☐ 188
- ☐ 189
- ☐ 190
- ☐ 191
- ☐ 192
- ☐ 193
- ☐ 194
- ☐ 195
- ☐ 196
- ☐ 197
- ☐ 198
- ☐ 199
- ☐ 200
- ☐ Don't know

---

Are either of your parents, or any of brothers or sisters overweight or obese?

- ☐ Yes
- ☐ No
- ☐ Don't know

---

Including any conditions which can be controlled with medication, have you ever been told by a doctor (GP or specialist) or nurse that you have any heart or circulatory conditions?

- ☐ Yes
- ☐ No
- ☐ Don't know

---

What are the names of this/these condition/s?  
(Tick all that apply)

- ☐ Angina
- ☐ Fluid problems/fluid retention/oedema
- ☐ Haemorrhoids
- ☐ Hardening of the arteries/atherosclerosis/arteriosclerosis
- ☐ Heart attack
- ☐ Heart failure
- ☐ Heart murmur/heart valve disorder
- ☐ High blood pressure/ hypertension
- ☐ High cholesterol
- ☐ Low blood pressure/hypotension
- ☐ Rapid or irregular heartbeats/tachycardia/palpitations
- ☐ Rheumatic heart disease
- ☐ Stroke (including after effects of stroke)
- ☐ Varicose veins
- ☐ Other (please specify)
- ☐ Don't know

---

please specify the other heart condition

\_\_\_\_\_

---

Do you have another heart of circulatory condition needs to be specified?

- ☐ Yes
- ☐ No

---

please specify the second heart condition

\_\_\_\_\_

---

Do you have another heart of circulatory condition needs to be specified?

☐ Yes ☐ No

---

please specify the third heart condition

---

At what age were you first told you had Rheumatic heart disease?

- ☐ 0
- ☐ 1
- ☐ 2
- ☐ 3
- ☐ 4
- ☐ 5
- ☐ 6
- ☐ 7
- ☐ 8
- ☐ 9
- ☐ 10
- ☐ 11
- ☐ 12
- ☐ 13
- ☐ 14
- ☐ 15
- ☐ 16
- ☐ 17
- ☐ 18
- ☐ 19
- ☐ 20
- ☐ 21
- ☐ 22
- ☐ 23
- ☐ 24
- ☐ 25
- ☐ 26
- ☐ 27
- ☐ 28
- ☐ 29
- ☐ 30
- ☐ 31
- ☐ 32
- ☐ 33
- ☐ 34
- ☐ 35
- ☐ 36
- ☐ 37
- ☐ 38
- ☐ 39
- ☐ 40
- ☐ 41
- ☐ 42
- ☐ 43
- ☐ 44
- ☐ 45
- ☐ 46
- ☐ 47
- ☐ 48
- ☐ 49
- ☐ 50
- ☐ 51
- ☐ 52
- ☐ 53
- ☐ 54
- ☐ 55
- ☐ 56
- ☐ 57
- ☐ 58
- ☐ 59
- ☐ 60
- ☐ 61
- ☐ 62
- ☐ 63
- ☐ 64
- ☐ 65
- ☐ 66
- ☐ 67
- ☐ 68

- ☐ 69
- ☐ 70
- ☐ 71
- ☐ 72
- ☐ 73
- ☐ 74
- ☐ 75
- ☐ 76
- ☐ 77
- ☐ 78
- ☐ 79
- ☐ 80
- ☐ 81
- ☐ 82
- ☐ 83
- ☐ 84
- ☐ 85
- ☐ 86
- ☐ 87
- ☐ 88
- ☐ 89
- ☐ 90
- ☐ 91
- ☐ 92
- ☐ 93
- ☐ 94
- ☐ 95
- ☐ 96
- ☐ 97
- ☐ 98
- ☐ 99
- ☐ Don't know

---

At what age were you first told you had heart attack?

- ☐ 0
- ☐ 1
- ☐ 2
- ☐ 3
- ☐ 4
- ☐ 5
- ☐ 6
- ☐ 7
- ☐ 8
- ☐ 9
- ☐ 10
- ☐ 11
- ☐ 12
- ☐ 13
- ☐ 14
- ☐ 15
- ☐ 16
- ☐ 17
- ☐ 18
- ☐ 19
- ☐ 20
- ☐ 21
- ☐ 22
- ☐ 23
- ☐ 24
- ☐ 25
- ☐ 26
- ☐ 27
- ☐ 28
- ☐ 29
- ☐ 30
- ☐ 31
- ☐ 32
- ☐ 33
- ☐ 34
- ☐ 35
- ☐ 36
- ☐ 37
- ☐ 38
- ☐ 39
- ☐ 40
- ☐ 41
- ☐ 42
- ☐ 43
- ☐ 44
- ☐ 45
- ☐ 46
- ☐ 47
- ☐ 48
- ☐ 49
- ☐ 50
- ☐ 51
- ☐ 52
- ☐ 53
- ☐ 54
- ☐ 55
- ☐ 56
- ☐ 57
- ☐ 58
- ☐ 59
- ☐ 60
- ☐ 61
- ☐ 62
- ☐ 63
- ☐ 64
- ☐ 65
- ☐ 66
- ☐ 67
- ☐ 68

- ☐ 69
- ☐ 70
- ☐ 71
- ☐ 72
- ☐ 73
- ☐ 74
- ☐ 75
- ☐ 76
- ☐ 77
- ☐ 78
- ☐ 79
- ☐ 80
- ☐ 81
- ☐ 82
- ☐ 83
- ☐ 84
- ☐ 85
- ☐ 86
- ☐ 87
- ☐ 88
- ☐ 89
- ☐ 90
- ☐ 91
- ☐ 92
- ☐ 93
- ☐ 94
- ☐ 95
- ☐ 96
- ☐ 97
- ☐ 98
- ☐ 99
- ☐ Don't know

---

At what age were you first told you had heart failure?

- ☐ 0
- ☐ 1
- ☐ 2
- ☐ 3
- ☐ 4
- ☐ 5
- ☐ 6
- ☐ 7
- ☐ 8
- ☐ 9
- ☐ 10
- ☐ 11
- ☐ 12
- ☐ 13
- ☐ 14
- ☐ 15
- ☐ 16
- ☐ 17
- ☐ 18
- ☐ 19
- ☐ 20
- ☐ 21
- ☐ 22
- ☐ 23
- ☐ 24
- ☐ 25
- ☐ 26
- ☐ 27
- ☐ 28
- ☐ 29
- ☐ 30
- ☐ 31
- ☐ 32
- ☐ 33
- ☐ 34
- ☐ 35
- ☐ 36
- ☐ 37
- ☐ 38
- ☐ 39
- ☐ 40
- ☐ 41
- ☐ 42
- ☐ 43
- ☐ 44
- ☐ 45
- ☐ 46
- ☐ 47
- ☐ 48
- ☐ 49
- ☐ 50
- ☐ 51
- ☐ 52
- ☐ 53
- ☐ 54
- ☐ 55
- ☐ 56
- ☐ 57
- ☐ 58
- ☐ 59
- ☐ 60
- ☐ 61
- ☐ 62
- ☐ 63
- ☐ 64
- ☐ 65
- ☐ 66
- ☐ 67
- ☐ 68



- ☐ 69
- ☐ 70
- ☐ 71
- ☐ 72
- ☐ 73
- ☐ 74
- ☐ 75
- ☐ 76
- ☐ 77
- ☐ 78
- ☐ 79
- ☐ 80
- ☐ 81
- ☐ 82
- ☐ 83
- ☐ 84
- ☐ 85
- ☐ 86
- ☐ 87
- ☐ 88
- ☐ 89
- ☐ 90
- ☐ 91
- ☐ 92
- ☐ 93
- ☐ 94
- ☐ 95
- ☐ 96
- ☐ 97
- ☐ 98
- ☐ 99
- ☐ Don't know

At what age were you first told you had stroke  
(including after effects of stroke)?

- ☐ 0
- ☐ 1
- ☐ 2
- ☐ 3
- ☐ 4
- ☐ 5
- ☐ 6
- ☐ 7
- ☐ 8
- ☐ 9
- ☐ 10
- ☐ 11
- ☐ 12
- ☐ 13
- ☐ 14
- ☐ 15
- ☐ 16
- ☐ 17
- ☐ 18
- ☐ 19
- ☐ 20
- ☐ 21
- ☐ 22
- ☐ 23
- ☐ 24
- ☐ 25
- ☐ 26
- ☐ 27
- ☐ 28
- ☐ 29
- ☐ 30
- ☐ 31
- ☐ 32
- ☐ 33
- ☐ 34
- ☐ 35
- ☐ 36
- ☐ 37
- ☐ 38
- ☐ 39
- ☐ 40
- ☐ 41
- ☐ 42
- ☐ 43
- ☐ 44
- ☐ 45
- ☐ 46
- ☐ 47
- ☐ 48
- ☐ 49
- ☐ 50
- ☐ 51
- ☐ 52
- ☐ 53
- ☐ 54
- ☐ 55
- ☐ 56
- ☐ 57
- ☐ 58
- ☐ 59
- ☐ 60
- ☐ 61
- ☐ 62
- ☐ 63
- ☐ 64
- ☐ 65
- ☐ 66
- ☐ 67
- ☐ 68

- ☐ 69
- ☐ 70
- ☐ 71
- ☐ 72
- ☐ 73
- ☐ 74
- ☐ 75
- ☐ 76
- ☐ 77
- ☐ 78
- ☐ 79
- ☐ 80
- ☐ 81
- ☐ 82
- ☐ 83
- ☐ 84
- ☐ 85
- ☐ 86
- ☐ 87
- ☐ 88
- ☐ 89
- ☐ 90
- ☐ 91
- ☐ 92
- ☐ 93
- ☐ 94
- ☐ 95
- ☐ 96
- ☐ 97
- ☐ 98
- ☐ 99
- ☐ Don't know

---

At what age were you first told you had angina?

- ☐ 0
- ☐ 1
- ☐ 2
- ☐ 3
- ☐ 4
- ☐ 5
- ☐ 6
- ☐ 7
- ☐ 8
- ☐ 9
- ☐ 10
- ☐ 11
- ☐ 12
- ☐ 13
- ☐ 14
- ☐ 15
- ☐ 16
- ☐ 17
- ☐ 18
- ☐ 19
- ☐ 20
- ☐ 21
- ☐ 22
- ☐ 23
- ☐ 24
- ☐ 25
- ☐ 26
- ☐ 27
- ☐ 28
- ☐ 29
- ☐ 30
- ☐ 31
- ☐ 32
- ☐ 33
- ☐ 34
- ☐ 35
- ☐ 36
- ☐ 37
- ☐ 38
- ☐ 39
- ☐ 40
- ☐ 41
- ☐ 42
- ☐ 43
- ☐ 44
- ☐ 45
- ☐ 46
- ☐ 47
- ☐ 48
- ☐ 49
- ☐ 50
- ☐ 51
- ☐ 52
- ☐ 53
- ☐ 54
- ☐ 55
- ☐ 56
- ☐ 57
- ☐ 58
- ☐ 59
- ☐ 60
- ☐ 61
- ☐ 62
- ☐ 63
- ☐ 64
- ☐ 65
- ☐ 66
- ☐ 67
- ☐ 68

- ☐ 69
- ☐ 70
- ☐ 71
- ☐ 72
- ☐ 73
- ☐ 74
- ☐ 75
- ☐ 76
- ☐ 77
- ☐ 78
- ☐ 79
- ☐ 80
- ☐ 81
- ☐ 82
- ☐ 83
- ☐ 84
- ☐ 85
- ☐ 86
- ☐ 87
- ☐ 88
- ☐ 89
- ☐ 90
- ☐ 91
- ☐ 92
- ☐ 93
- ☐ 94
- ☐ 95
- ☐ 96
- ☐ 97
- ☐ 98
- ☐ 99
- ☐ Don't know

At what age were you first told you had high blood pressure/hypertension?

- ☐ 0
- ☐ 1
- ☐ 2
- ☐ 3
- ☐ 4
- ☐ 5
- ☐ 6
- ☐ 7
- ☐ 8
- ☐ 9
- ☐ 10
- ☐ 11
- ☐ 12
- ☐ 13
- ☐ 14
- ☐ 15
- ☐ 16
- ☐ 17
- ☐ 18
- ☐ 19
- ☐ 20
- ☐ 21
- ☐ 22
- ☐ 23
- ☐ 24
- ☐ 25
- ☐ 26
- ☐ 27
- ☐ 28
- ☐ 29
- ☐ 30
- ☐ 31
- ☐ 32
- ☐ 33
- ☐ 34
- ☐ 35
- ☐ 36
- ☐ 37
- ☐ 38
- ☐ 39
- ☐ 40
- ☐ 41
- ☐ 42
- ☐ 43
- ☐ 44
- ☐ 45
- ☐ 46
- ☐ 47
- ☐ 48
- ☐ 49
- ☐ 50
- ☐ 51
- ☐ 52
- ☐ 53
- ☐ 54
- ☐ 55
- ☐ 56
- ☐ 57
- ☐ 58
- ☐ 59
- ☐ 60
- ☐ 61
- ☐ 62
- ☐ 63
- ☐ 64
- ☐ 65
- ☐ 66
- ☐ 67
- ☐ 68

- ☐ 69
- ☐ 70
- ☐ 71
- ☐ 72
- ☐ 73
- ☐ 74
- ☐ 75
- ☐ 76
- ☐ 77
- ☐ 78
- ☐ 79
- ☐ 80
- ☐ 81
- ☐ 82
- ☐ 83
- ☐ 84
- ☐ 85
- ☐ 86
- ☐ 87
- ☐ 88
- ☐ 89
- ☐ 90
- ☐ 91
- ☐ 92
- ☐ 93
- ☐ 94
- ☐ 95
- ☐ 96
- ☐ 97
- ☐ 98
- ☐ 99
- ☐ Don't know

At what age were you first told you had low blood pressure/hypotension

- ☐ 0
- ☐ 1
- ☐ 2
- ☐ 3
- ☐ 4
- ☐ 5
- ☐ 6
- ☐ 7
- ☐ 8
- ☐ 9
- ☐ 10
- ☐ 11
- ☐ 12
- ☐ 13
- ☐ 14
- ☐ 15
- ☐ 16
- ☐ 17
- ☐ 18
- ☐ 19
- ☐ 20
- ☐ 21
- ☐ 22
- ☐ 23
- ☐ 24
- ☐ 25
- ☐ 26
- ☐ 27
- ☐ 28
- ☐ 29
- ☐ 30
- ☐ 31
- ☐ 32
- ☐ 33
- ☐ 34
- ☐ 35
- ☐ 36
- ☐ 37
- ☐ 38
- ☐ 39
- ☐ 40
- ☐ 41
- ☐ 42
- ☐ 43
- ☐ 44
- ☐ 45
- ☐ 46
- ☐ 47
- ☐ 48
- ☐ 49
- ☐ 50
- ☐ 51
- ☐ 52
- ☐ 53
- ☐ 54
- ☐ 55
- ☐ 56
- ☐ 57
- ☐ 58
- ☐ 59
- ☐ 60
- ☐ 61
- ☐ 62
- ☐ 63
- ☐ 64
- ☐ 65
- ☐ 66
- ☐ 67
- ☐ 68



- ☐ 69
- ☐ 70
- ☐ 71
- ☐ 72
- ☐ 73
- ☐ 74
- ☐ 75
- ☐ 76
- ☐ 77
- ☐ 78
- ☐ 79
- ☐ 80
- ☐ 81
- ☐ 82
- ☐ 83
- ☐ 84
- ☐ 85
- ☐ 86
- ☐ 87
- ☐ 88
- ☐ 89
- ☐ 90
- ☐ 91
- ☐ 92
- ☐ 93
- ☐ 94
- ☐ 95
- ☐ 96
- ☐ 97
- ☐ 98
- ☐ 99
- ☐ Don't know

At what age were you first told you had hardening of the arteries/atherosclerosis/arteriosclerosis?

- ☐ 0
- ☐ 1
- ☐ 2
- ☐ 3
- ☐ 4
- ☐ 5
- ☐ 6
- ☐ 7
- ☐ 8
- ☐ 9
- ☐ 10
- ☐ 11
- ☐ 12
- ☐ 13
- ☐ 14
- ☐ 15
- ☐ 16
- ☐ 17
- ☐ 18
- ☐ 19
- ☐ 20
- ☐ 21
- ☐ 22
- ☐ 23
- ☐ 24
- ☐ 25
- ☐ 26
- ☐ 27
- ☐ 28
- ☐ 29
- ☐ 30
- ☐ 31
- ☐ 32
- ☐ 33
- ☐ 34
- ☐ 35
- ☐ 36
- ☐ 37
- ☐ 38
- ☐ 39
- ☐ 40
- ☐ 41
- ☐ 42
- ☐ 43
- ☐ 44
- ☐ 45
- ☐ 46
- ☐ 47
- ☐ 48
- ☐ 49
- ☐ 50
- ☐ 51
- ☐ 52
- ☐ 53
- ☐ 54
- ☐ 55
- ☐ 56
- ☐ 57
- ☐ 58
- ☐ 59
- ☐ 60
- ☐ 61
- ☐ 62
- ☐ 63
- ☐ 64
- ☐ 65
- ☐ 66
- ☐ 67
- ☐ 68

- ☐ 69
- ☐ 70
- ☐ 71
- ☐ 72
- ☐ 73
- ☐ 74
- ☐ 75
- ☐ 76
- ☐ 77
- ☐ 78
- ☐ 79
- ☐ 80
- ☐ 81
- ☐ 82
- ☐ 83
- ☐ 84
- ☐ 85
- ☐ 86
- ☐ 87
- ☐ 88
- ☐ 89
- ☐ 90
- ☐ 91
- ☐ 92
- ☐ 93
- ☐ 94
- ☐ 95
- ☐ 96
- ☐ 97
- ☐ 98
- ☐ 99
- ☐ Don't know

At what age were you first told you had fluid problems/fluid retention/oedema?

- ☐ 0
- ☐ 1
- ☐ 2
- ☐ 3
- ☐ 4
- ☐ 5
- ☐ 6
- ☐ 7
- ☐ 8
- ☐ 9
- ☐ 10
- ☐ 11
- ☐ 12
- ☐ 13
- ☐ 14
- ☐ 15
- ☐ 16
- ☐ 17
- ☐ 18
- ☐ 19
- ☐ 20
- ☐ 21
- ☐ 22
- ☐ 23
- ☐ 24
- ☐ 25
- ☐ 26
- ☐ 27
- ☐ 28
- ☐ 29
- ☐ 30
- ☐ 31
- ☐ 32
- ☐ 33
- ☐ 34
- ☐ 35
- ☐ 36
- ☐ 37
- ☐ 38
- ☐ 39
- ☐ 40
- ☐ 41
- ☐ 42
- ☐ 43
- ☐ 44
- ☐ 45
- ☐ 46
- ☐ 47
- ☐ 48
- ☐ 49
- ☐ 50
- ☐ 51
- ☐ 52
- ☐ 53
- ☐ 54
- ☐ 55
- ☐ 56
- ☐ 57
- ☐ 58
- ☐ 59
- ☐ 60
- ☐ 61
- ☐ 62
- ☐ 63
- ☐ 64
- ☐ 65
- ☐ 66
- ☐ 67
- ☐ 68

- ☐ 69
- ☐ 70
- ☐ 71
- ☐ 72
- ☐ 73
- ☐ 74
- ☐ 75
- ☐ 76
- ☐ 77
- ☐ 78
- ☐ 79
- ☐ 80
- ☐ 81
- ☐ 82
- ☐ 83
- ☐ 84
- ☐ 85
- ☐ 86
- ☐ 87
- ☐ 88
- ☐ 89
- ☐ 90
- ☐ 91
- ☐ 92
- ☐ 93
- ☐ 94
- ☐ 95
- ☐ 96
- ☐ 97
- ☐ 98
- ☐ 99
- ☐ Don't know

At what age were you first told you had high cholesterol?

- ☐ 0
- ☐ 1
- ☐ 2
- ☐ 3
- ☐ 4
- ☐ 5
- ☐ 6
- ☐ 7
- ☐ 8
- ☐ 9
- ☐ 10
- ☐ 11
- ☐ 12
- ☐ 13
- ☐ 14
- ☐ 15
- ☐ 16
- ☐ 17
- ☐ 18
- ☐ 19
- ☐ 20
- ☐ 21
- ☐ 22
- ☐ 23
- ☐ 24
- ☐ 25
- ☐ 26
- ☐ 27
- ☐ 28
- ☐ 29
- ☐ 30
- ☐ 31
- ☐ 32
- ☐ 33
- ☐ 34
- ☐ 35
- ☐ 36
- ☐ 37
- ☐ 38
- ☐ 39
- ☐ 40
- ☐ 41
- ☐ 42
- ☐ 43
- ☐ 44
- ☐ 45
- ☐ 46
- ☐ 47
- ☐ 48
- ☐ 49
- ☐ 50
- ☐ 51
- ☐ 52
- ☐ 53
- ☐ 54
- ☐ 55
- ☐ 56
- ☐ 57
- ☐ 58
- ☐ 59
- ☐ 60
- ☐ 61
- ☐ 62
- ☐ 63
- ☐ 64
- ☐ 65
- ☐ 66
- ☐ 67
- ☐ 68

- ☐ 69
- ☐ 70
- ☐ 71
- ☐ 72
- ☐ 73
- ☐ 74
- ☐ 75
- ☐ 76
- ☐ 77
- ☐ 78
- ☐ 79
- ☐ 80
- ☐ 81
- ☐ 82
- ☐ 83
- ☐ 84
- ☐ 85
- ☐ 86
- ☐ 87
- ☐ 88
- ☐ 89
- ☐ 90
- ☐ 91
- ☐ 92
- ☐ 93
- ☐ 94
- ☐ 95
- ☐ 96
- ☐ 97
- ☐ 98
- ☐ 99
- ☐ Don't know

At what age were you first told you had rapid or irregular heartbeats/tachycardia/palpitations?

- ☐ 0
- ☐ 1
- ☐ 2
- ☐ 3
- ☐ 4
- ☐ 5
- ☐ 6
- ☐ 7
- ☐ 8
- ☐ 9
- ☐ 10
- ☐ 11
- ☐ 12
- ☐ 13
- ☐ 14
- ☐ 15
- ☐ 16
- ☐ 17
- ☐ 18
- ☐ 19
- ☐ 20
- ☐ 21
- ☐ 22
- ☐ 23
- ☐ 24
- ☐ 25
- ☐ 26
- ☐ 27
- ☐ 28
- ☐ 29
- ☐ 30
- ☐ 31
- ☐ 32
- ☐ 33
- ☐ 34
- ☐ 35
- ☐ 36
- ☐ 37
- ☐ 38
- ☐ 39
- ☐ 40
- ☐ 41
- ☐ 42
- ☐ 43
- ☐ 44
- ☐ 45
- ☐ 46
- ☐ 47
- ☐ 48
- ☐ 49
- ☐ 50
- ☐ 51
- ☐ 52
- ☐ 53
- ☐ 54
- ☐ 55
- ☐ 56
- ☐ 57
- ☐ 58
- ☐ 59
- ☐ 60
- ☐ 61
- ☐ 62
- ☐ 63
- ☐ 64
- ☐ 65
- ☐ 66
- ☐ 67
- ☐ 68



- ☐ 69
- ☐ 70
- ☐ 71
- ☐ 72
- ☐ 73
- ☐ 74
- ☐ 75
- ☐ 76
- ☐ 77
- ☐ 78
- ☐ 79
- ☐ 80
- ☐ 81
- ☐ 82
- ☐ 83
- ☐ 84
- ☐ 85
- ☐ 86
- ☐ 87
- ☐ 88
- ☐ 89
- ☐ 90
- ☐ 91
- ☐ 92
- ☐ 93
- ☐ 94
- ☐ 95
- ☐ 96
- ☐ 97
- ☐ 98
- ☐ 99
- ☐ Don't know

At what age were you first told you had heart  
murmur/heart valve disorder?

- ☐ 0
- ☐ 1
- ☐ 2
- ☐ 3
- ☐ 4
- ☐ 5
- ☐ 6
- ☐ 7
- ☐ 8
- ☐ 9
- ☐ 10
- ☐ 11
- ☐ 12
- ☐ 13
- ☐ 14
- ☐ 15
- ☐ 16
- ☐ 17
- ☐ 18
- ☐ 19
- ☐ 20
- ☐ 21
- ☐ 22
- ☐ 23
- ☐ 24
- ☐ 25
- ☐ 26
- ☐ 27
- ☐ 28
- ☐ 29
- ☐ 30
- ☐ 31
- ☐ 32
- ☐ 33
- ☐ 34
- ☐ 35
- ☐ 36
- ☐ 37
- ☐ 38
- ☐ 39
- ☐ 40
- ☐ 41
- ☐ 42
- ☐ 43
- ☐ 44
- ☐ 45
- ☐ 46
- ☐ 47
- ☐ 48
- ☐ 49
- ☐ 50
- ☐ 51
- ☐ 52
- ☐ 53
- ☐ 54
- ☐ 55
- ☐ 56
- ☐ 57
- ☐ 58
- ☐ 59
- ☐ 60
- ☐ 61
- ☐ 62
- ☐ 63
- ☐ 64
- ☐ 65
- ☐ 66
- ☐ 67
- ☐ 68

- ☐ 69
- ☐ 70
- ☐ 71
- ☐ 72
- ☐ 73
- ☐ 74
- ☐ 75
- ☐ 76
- ☐ 77
- ☐ 78
- ☐ 79
- ☐ 80
- ☐ 81
- ☐ 82
- ☐ 83
- ☐ 84
- ☐ 85
- ☐ 86
- ☐ 87
- ☐ 88
- ☐ 89
- ☐ 90
- ☐ 91
- ☐ 92
- ☐ 93
- ☐ 94
- ☐ 95
- ☐ 96
- ☐ 97
- ☐ 98
- ☐ 99
- ☐ Don't know

---

At what age were you first told you had haemorrhoids?

- ☐ 0
- ☐ 1
- ☐ 2
- ☐ 3
- ☐ 4
- ☐ 5
- ☐ 6
- ☐ 7
- ☐ 8
- ☐ 9
- ☐ 10
- ☐ 11
- ☐ 12
- ☐ 13
- ☐ 14
- ☐ 15
- ☐ 16
- ☐ 17
- ☐ 18
- ☐ 19
- ☐ 20
- ☐ 21
- ☐ 22
- ☐ 23
- ☐ 24
- ☐ 25
- ☐ 26
- ☐ 27
- ☐ 28
- ☐ 29
- ☐ 30
- ☐ 31
- ☐ 32
- ☐ 33
- ☐ 34
- ☐ 35
- ☐ 36
- ☐ 37
- ☐ 38
- ☐ 39
- ☐ 40
- ☐ 41
- ☐ 42
- ☐ 43
- ☐ 44
- ☐ 45
- ☐ 46
- ☐ 47
- ☐ 48
- ☐ 49
- ☐ 50
- ☐ 51
- ☐ 52
- ☐ 53
- ☐ 54
- ☐ 55
- ☐ 56
- ☐ 57
- ☐ 58
- ☐ 59
- ☐ 60
- ☐ 61
- ☐ 62
- ☐ 63
- ☐ 64
- ☐ 65
- ☐ 66
- ☐ 67
- ☐ 68

- ☐ 69
- ☐ 70
- ☐ 71
- ☐ 72
- ☐ 73
- ☐ 74
- ☐ 75
- ☐ 76
- ☐ 77
- ☐ 78
- ☐ 79
- ☐ 80
- ☐ 81
- ☐ 82
- ☐ 83
- ☐ 84
- ☐ 85
- ☐ 86
- ☐ 87
- ☐ 88
- ☐ 89
- ☐ 90
- ☐ 91
- ☐ 92
- ☐ 93
- ☐ 94
- ☐ 95
- ☐ 96
- ☐ 97
- ☐ 98
- ☐ 99
- ☐ Don't know

At what age were you first told you had varicose veins?

- ☐ 0
- ☐ 1
- ☐ 2
- ☐ 3
- ☐ 4
- ☐ 5
- ☐ 6
- ☐ 7
- ☐ 8
- ☐ 9
- ☐ 10
- ☐ 11
- ☐ 12
- ☐ 13
- ☐ 14
- ☐ 15
- ☐ 16
- ☐ 17
- ☐ 18
- ☐ 19
- ☐ 20
- ☐ 21
- ☐ 22
- ☐ 23
- ☐ 24
- ☐ 25
- ☐ 26
- ☐ 27
- ☐ 28
- ☐ 29
- ☐ 30
- ☐ 31
- ☐ 32
- ☐ 33
- ☐ 34
- ☐ 35
- ☐ 36
- ☐ 37
- ☐ 38
- ☐ 39
- ☐ 40
- ☐ 41
- ☐ 42
- ☐ 43
- ☐ 44
- ☐ 45
- ☐ 46
- ☐ 47
- ☐ 48
- ☐ 49
- ☐ 50
- ☐ 51
- ☐ 52
- ☐ 53
- ☐ 54
- ☐ 55
- ☐ 56
- ☐ 57
- ☐ 58
- ☐ 59
- ☐ 60
- ☐ 61
- ☐ 62
- ☐ 63
- ☐ 64
- ☐ 65
- ☐ 66
- ☐ 67
- ☐ 68

- ☐ 69
- ☐ 70
- ☐ 71
- ☐ 72
- ☐ 73
- ☐ 74
- ☐ 75
- ☐ 76
- ☐ 77
- ☐ 78
- ☐ 79
- ☐ 80
- ☐ 81
- ☐ 82
- ☐ 83
- ☐ 84
- ☐ 85
- ☐ 86
- ☐ 87
- ☐ 88
- ☐ 89
- ☐ 90
- ☐ 91
- ☐ 92
- ☐ 93
- ☐ 94
- ☐ 95
- ☐ 96
- ☐ 97
- ☐ 98
- ☐ 99
- ☐ Don't know

At what age were you first told you had  
[heart\_others]?

- ☐ 0
- ☐ 1
- ☐ 2
- ☐ 3
- ☐ 4
- ☐ 5
- ☐ 6
- ☐ 7
- ☐ 8
- ☐ 9
- ☐ 10
- ☐ 11
- ☐ 12
- ☐ 13
- ☐ 14
- ☐ 15
- ☐ 16
- ☐ 17
- ☐ 18
- ☐ 19
- ☐ 20
- ☐ 21
- ☐ 22
- ☐ 23
- ☐ 24
- ☐ 25
- ☐ 26
- ☐ 27
- ☐ 28
- ☐ 29
- ☐ 30
- ☐ 31
- ☐ 32
- ☐ 33
- ☐ 34
- ☐ 35
- ☐ 36
- ☐ 37
- ☐ 38
- ☐ 39
- ☐ 40
- ☐ 41
- ☐ 42
- ☐ 43
- ☐ 44
- ☐ 45
- ☐ 46
- ☐ 47
- ☐ 48
- ☐ 49
- ☐ 50
- ☐ 51
- ☐ 52
- ☐ 53
- ☐ 54
- ☐ 55
- ☐ 56
- ☐ 57
- ☐ 58
- ☐ 59
- ☐ 60
- ☐ 61
- ☐ 62
- ☐ 63
- ☐ 64
- ☐ 65
- ☐ 66
- ☐ 67
- ☐ 68



- ☐ 69
- ☐ 70
- ☐ 71
- ☐ 72
- ☐ 73
- ☐ 74
- ☐ 75
- ☐ 76
- ☐ 77
- ☐ 78
- ☐ 79
- ☐ 80
- ☐ 81
- ☐ 82
- ☐ 83
- ☐ 84
- ☐ 85
- ☐ 86
- ☐ 87
- ☐ 88
- ☐ 89
- ☐ 90
- ☐ 91
- ☐ 92
- ☐ 93
- ☐ 94
- ☐ 95
- ☐ 96
- ☐ 97
- ☐ 98
- ☐ 99
- ☐ Don't know

At what age were you first told you had  
[heart\_others\_2]?

- ☐ 0
- ☐ 1
- ☐ 2
- ☐ 3
- ☐ 4
- ☐ 5
- ☐ 6
- ☐ 7
- ☐ 8
- ☐ 9
- ☐ 10
- ☐ 11
- ☐ 12
- ☐ 13
- ☐ 14
- ☐ 15
- ☐ 16
- ☐ 17
- ☐ 18
- ☐ 19
- ☐ 20
- ☐ 21
- ☐ 22
- ☐ 23
- ☐ 24
- ☐ 25
- ☐ 26
- ☐ 27
- ☐ 28
- ☐ 29
- ☐ 30
- ☐ 31
- ☐ 32
- ☐ 33
- ☐ 34
- ☐ 35
- ☐ 36
- ☐ 37
- ☐ 38
- ☐ 39
- ☐ 40
- ☐ 41
- ☐ 42
- ☐ 43
- ☐ 44
- ☐ 45
- ☐ 46
- ☐ 47
- ☐ 48
- ☐ 49
- ☐ 50
- ☐ 51
- ☐ 52
- ☐ 53
- ☐ 54
- ☐ 55
- ☐ 56
- ☐ 57
- ☐ 58
- ☐ 59
- ☐ 60
- ☐ 61
- ☐ 62
- ☐ 63
- ☐ 64
- ☐ 65
- ☐ 66
- ☐ 67
- ☐ 68

- ☐ 69
- ☐ 70
- ☐ 71
- ☐ 72
- ☐ 73
- ☐ 74
- ☐ 75
- ☐ 76
- ☐ 77
- ☐ 78
- ☐ 79
- ☐ 80
- ☐ 81
- ☐ 82
- ☐ 83
- ☐ 84
- ☐ 85
- ☐ 86
- ☐ 87
- ☐ 88
- ☐ 89
- ☐ 90
- ☐ 91
- ☐ 92
- ☐ 93
- ☐ 94
- ☐ 95
- ☐ 96
- ☐ 97
- ☐ 98
- ☐ 99
- ☐ Don't know

At what age were you first told you had  
[heart\_others\_3]?

- ☐ 0
- ☐ 1
- ☐ 2
- ☐ 3
- ☐ 4
- ☐ 5
- ☐ 6
- ☐ 7
- ☐ 8
- ☐ 9
- ☐ 10
- ☐ 11
- ☐ 12
- ☐ 13
- ☐ 14
- ☐ 15
- ☐ 16
- ☐ 17
- ☐ 18
- ☐ 19
- ☐ 20
- ☐ 21
- ☐ 22
- ☐ 23
- ☐ 24
- ☐ 25
- ☐ 26
- ☐ 27
- ☐ 28
- ☐ 29
- ☐ 30
- ☐ 31
- ☐ 32
- ☐ 33
- ☐ 34
- ☐ 35
- ☐ 36
- ☐ 37
- ☐ 38
- ☐ 39
- ☐ 40
- ☐ 41
- ☐ 42
- ☐ 43
- ☐ 44
- ☐ 45
- ☐ 46
- ☐ 47
- ☐ 48
- ☐ 49
- ☐ 50
- ☐ 51
- ☐ 52
- ☐ 53
- ☐ 54
- ☐ 55
- ☐ 56
- ☐ 57
- ☐ 58
- ☐ 59
- ☐ 60
- ☐ 61
- ☐ 62
- ☐ 63
- ☐ 64
- ☐ 65
- ☐ 66
- ☐ 67
- ☐ 68

- ☐ 69
- ☐ 70
- ☐ 71
- ☐ 72
- ☐ 73
- ☐ 74
- ☐ 75
- ☐ 76
- ☐ 77
- ☐ 78
- ☐ 79
- ☐ 80
- ☐ 81
- ☐ 82
- ☐ 83
- ☐ 84
- ☐ 85
- ☐ 86
- ☐ 87
- ☐ 88
- ☐ 89
- ☐ 90
- ☐ 91
- ☐ 92
- ☐ 93
- ☐ 94
- ☐ 95
- ☐ 96
- ☐ 97
- ☐ 98
- ☐ 99
- ☐ Don't know

At what age were you first told you had this condition?

- ☐ 0
- ☐ 1
- ☐ 2
- ☐ 3
- ☐ 4
- ☐ 5
- ☐ 6
- ☐ 7
- ☐ 8
- ☐ 9
- ☐ 10
- ☐ 11
- ☐ 12
- ☐ 13
- ☐ 14
- ☐ 15
- ☐ 16
- ☐ 17
- ☐ 18
- ☐ 19
- ☐ 20
- ☐ 21
- ☐ 22
- ☐ 23
- ☐ 24
- ☐ 25
- ☐ 26
- ☐ 27
- ☐ 28
- ☐ 29
- ☐ 30
- ☐ 31
- ☐ 32
- ☐ 33
- ☐ 34
- ☐ 35
- ☐ 36
- ☐ 37
- ☐ 38
- ☐ 39
- ☐ 40
- ☐ 41
- ☐ 42
- ☐ 43
- ☐ 44
- ☐ 45
- ☐ 46
- ☐ 47
- ☐ 48
- ☐ 49
- ☐ 50
- ☐ 51
- ☐ 52
- ☐ 53
- ☐ 54
- ☐ 55
- ☐ 56
- ☐ 57
- ☐ 58
- ☐ 59
- ☐ 60
- ☐ 61
- ☐ 62
- ☐ 63
- ☐ 64
- ☐ 65
- ☐ 66
- ☐ 67
- ☐ 68

- ☐ 69
- ☐ 70
- ☐ 71
- ☐ 72
- ☐ 73
- ☐ 74
- ☐ 75
- ☐ 76
- ☐ 77
- ☐ 78
- ☐ 79
- ☐ 80
- ☐ 81
- ☐ 82
- ☐ 83
- ☐ 84
- ☐ 85
- ☐ 86
- ☐ 87
- ☐ 88
- ☐ 89
- ☐ 90
- ☐ 91
- ☐ 92
- ☐ 93
- ☐ 94
- ☐ 95
- ☐ 96
- ☐ 97
- ☐ 98
- ☐ 99
- ☐ Don't know

---

Do you still have rheumatic heart disease?

- ☐ Yes
- ☐ No
- ☐ Don't know

---

Do you still have heart attack?

- ☐ Yes
- ☐ No
- ☐ Don't know

---

Do you still have heart failure?

- ☐ Yes
- ☐ No
- ☐ Don't know

---

Do you still have stroke (including after effects of stroke)?

- ☐ Yes
- ☐ No
- ☐ Don't know

---

Do you still have angina?

- ☐ Yes
- ☐ No
- ☐ Don't know

---

Do you still have high blood pressure/hypertension?

- ☐ Yes
- ☐ No
- ☐ Don't know

---

Do you still have low blood pressure/hypotension?

- ☐ Yes
- ☐ No
- ☐ Don't know

---

Do you still have hardening of the  
arteries/atherosclerosis/arteriosclerosis?

- ☐ Yes  
☐ No  
☐ Don't know
- 

Do you still have fluid problems/fluid  
retention/oedema?

- ☐ Yes  
☐ No  
☐ Don't know
- 

Do you still have high cholesterol?

- ☐ Yes  
☐ No  
☐ Don't know
- 

Do you still have rapid or irregular  
heartbeats/tachycardia/palpitations?

- ☐ Yes  
☐ No  
☐ Don't know
- 

Do you still have heart murmur/heart valve disorder

- ☐ Yes  
☐ No  
☐ Don't know
- 

Do you still have haemorrhoids?

- ☐ Yes  
☐ No  
☐ Don't know
- 

Do you still have varicose veins?

- ☐ Yes  
☐ No  
☐ Don't know
- 

Do you still have [heart\_others]?

- ☐ Yes  
☐ No  
☐ Don't know
- 

Do you still have [heart\_others\_2]?

- ☐ Yes  
☐ No  
☐ Don't know
- 

Do you still have [heart\_others\_3]?

- ☐ Yes  
☐ No  
☐ Don't know
- 

Do you still have this condition?

- ☐ Yes  
☐ No  
☐ Don't know
- 

How is rheumatic heart disease treated?  
(Tick all that apply)

- ☐ no treatment   ☐ diet   ☐ exercise   ☐ medication (please specify)   ☐ natural/herbal therapy (please specify)  
☐ weight management   ☐ supplements (please specify)   ☐ other (please specify)  
☐ Don't know
- 

please specify the medication

---

Please specify the natural/herbal therapy

---



---

please specify the supplements

---

---

please specify the treatment

---

---

How is heart attack treated?  
(Tick all that apply)

- ☐ no treatment   ☐ diet   ☐ exercise   ☐ medication (please specify)   ☐ natural/herbal therapy (please specify)   ☐ weight management   ☐ supplements (please specify)   ☐ other (please specify)  
☐ Don't know
- 

---

please specify the medication

---

---

please specify the natural/herbal therapy

---

---

please specify the supplements

---

---

please specify the treatment

---

---

How is heart failure treated?

- ☐ no treatment   ☐ diet  
☐ exercise   ☐ medication (please specify)  
☐ natural/herbal therapy (please specify)  
☐ weight management  
☐ supplements (please specify)  
☐ other (please specify)  
☐ Don't know  
(Tick all that apply)
- 

---

please specify the medication

---

---

please specify the natural/herbal therapy

---

---

please specify the supplements

---

---

please specify the treatment

---

---

How is stroke (including after effects of stroke) treated?  
(Tick all that apply)

- ☐ no treatment   ☐ diet   ☐ exercise   ☐ medication (please specify)   ☐ natural/herbal therapy (please specify)  
☐ weight management   ☐ supplements (please specify)   ☐ other (please specify)  
☐ Don't know

---

please specify the medication

---

---

please specify the natural/herbal therapy

---

---

please specify the supplements

---

---

please specify the treatment

---

---

How is angina treated?  
(Tick all that apply)

- ☐ no treatment   ☐ diet   ☐ exercise   ☐ medication (please specify)   ☐ natural/herbal therapy (please specify)  
☐ weight management   ☐ supplements (please specify)   ☐ other (please specify)  
☐ Don't know

---

please specify the medication

---

---

please specify the natural/herbal therapy

---

---

please specify the supplements

---

---

please specify the treatment

---

---

How is high blood pressure/hypertension treated?  
(Tick all that apply)

- ☐ no treatment   ☐ diet   ☐ exercise   ☐ medication (please specify)   ☐ natural/herbal therapy (please specify)  
☐ weight management   ☐ supplements (please specify)   ☐ other (please specify)  
☐ Don't know

---

please specify the medication

---

---

please specify the natural/herbal therapy

---

---

please specify the supplements

---

---

please specify the treatment

---

---

How is low blood pressure/hypotension treated?

(Tick all that apply)

- ☐ no treatment   ☐ diet   ☐ exercise   ☐ medication (please specify)   ☐ natural/herbal therapy (please specify)   ☐ weight management   ☐ supplements (please specify)   ☐ other (please specify)  
☐ Don't know

---

please specify the medication

---

---

please specify the natural/herbal therapy

---

---

please specify the supplements

---

---

please specify the treatment

---

---

How is hardening of the arteries/atherosclerosis/arteriosclerosis treated?

(Tick all that apply)

- ☐ no treatment   ☐ diet   ☐ exercise   ☐ medication (please specify)   ☐ natural/herbal therapy (please specify)   ☐ weight management   ☐ supplements (please specify)   ☐ other (please specify)  
☐ Don't know

---

please specify the medication

---

---

please specify the natural/herbal therapy

---

---

please specify the supplements

---

---

please specify the treatment

---

---

How is fluid problems/fluid retention/oedema treated?

(Tick all that apply)

- ☐ no treatment   ☐ diet   ☐ exercise   ☐ medication (please specify)   ☐ natural/herbal therapy (please specify)   ☐ weight management   ☐ supplements (please specify)   ☐ other (please specify)  
☐ Don't know

---

please specify the medication

---

---

please specify the natural/herbal therapy

---

---

please specify the supplements

---

---

please specify the treatment

---

---

How is high cholesterol treated?  
(Tick all that apply)

- ☐ no treatment   ☐ diet   ☐ exercise   ☐ medication (please specify)   ☐ natural/herbal therapy (please specify)  
☐ weight management   ☐ supplements (please specify)   ☐ other (please specify)  
☐ Don't know

---

please specify the medication

---

---

please specify the natural/herbal therapy

---

---

please specify the supplements

---

---

please specify the treatment

---

---

How is rapid or irregular heartbeats/tachycardia/palpitations treated?  
(Tick all that apply)

- ☐ no treatment   ☐ diet   ☐ exercise   ☐ medication (please specify)   ☐ natural/herbal therapy (please specify)  
☐ weight management   ☐ supplements (please specify)   ☐ other (please specify)  
☐ Don't know

---

please specify the medication

---

---

please specify the natural/herbal therapy

---

---

please specify the supplements

---

---

please specify the treatment

---

---

How is heart murmur/heart valve disorder treated/  
(Tick all that apply)

- ☐ no treatment   ☐ diet   ☐ exercise   ☐ medication (please specify)   ☐ natural/herbal therapy (please specify)  
☐ weight management   ☐ supplements (please specify)   ☐ other (please specify)  
☐ Don't know

---

please specify the medication

---

---

please specify the natural/herbal therapy

---

---

please specify the supplements

---

---

please specify the treatment

---

---

How is haemorrhoids treated?

(Tick all that apply)

- ☐ no treatment   ☐ diet   ☐ exercise   ☐ medication (please specify)   ☐ natural/herbal therapy (please specify)   ☐ weight management   ☐ supplements (please specify)   ☐ other (please specify)  
☐ Don't know

---

please specify the medication

---

---

please specify the natural/herbal therapy

---

---

please specify the supplements

---

---

please specify the treatment

---

---

How is varicose veins treated?

(Tick all that apply)

- ☐ no treatment   ☐ diet   ☐ exercise   ☐ medication (please specify)   ☐ natural/herbal therapy (please specify)   ☐ weight management   ☐ supplements (please specify)   ☐ other (please specify)  
☐ Don't know

---

please specify the medication

---

---

please specify the natural/herbal therapy

---

---

please specify the supplements

---

---

please specify the treatment

---

---

How is [heart\_others] treated?

(Tick all that apply)

- ☐ no treatment   ☐ diet   ☐ exercise   ☐ medication (please specify)   ☐ natural/herbal therapy (please specify)   ☐ weight management   ☐ supplements (please specify)   ☐ other (please specify)  
☐ Don't know

---

please specify the medication

---

---

please specify the natural/herbal therapy

---

---

please specify the supplements

---

---

please specify the treatment

---

---

How is [heart\_others\_2] treated?  
(Tick all that apply)

- ☐ no treatment   ☐ diet   ☐ exercise   ☐ medication (please specify)   ☐ natural/herbal therapy (please specify)   ☐ weight management   ☐ supplements (please specify)   ☐ other (please specify)  
☐ Don't know

---

please specify the medication

---

---

please specify the natural/herbal therapy

---

---

please specify the supplements

---

---

please specify the treatment

---

---

How is [heart\_others\_3] treated?  
(Tick all that apply)

- ☐ no treatment   ☐ diet   ☐ exercise   ☐ medication (please specify)   ☐ natural/herbal therapy (please specify)   ☐ weight management   ☐ supplements (please specify)   ☐ other (please specify)  
☐ Don't know

---

please specify the medication

---

---

please specify the natural/herbal therapy

---

---

please specify the supplements

---

---

please specify the treatment

---

---

How is this condition treated?  
(Tick all that apply)

- ☐ no treatment   ☐ diet   ☐ exercise   ☐ medication (please specify)   ☐ natural/herbal therapy (please specify)   ☐ weight management   ☐ supplements (please specify)   ☐ other (please specify)  
☐ Don't know

---

please specify the medication

---

---

please specify the natural/herbal therapy

---

---

please specify the supplements

---

---

please specify the treatment

---

---

Have either of your parents, or any of brothers or sisters ever been told by a doctor (GP or specialist) or nurse that they have any heart or circulatory conditions?

- ☐ Yes  
☐ No  
☐ Don't know

---

Including any conditions which can be controlled with medication, have you ever been told by a doctor (GP or specialist) or nurse that you have diabetes or pre-diabetes?

- ☐ Yes  
☐ No  
☐ Don't know

---

What are the names of this/these condition/s?  
(Tick any that apply)

- ☐ Diabetes insipidus  
☐ Gestational (pregnancy)  
☐ Pre-diabetes (impaired fasting glucose, impaired glucose tolerance)  
☐ Type 1 (Insulin Dependent Diabetes Mellitus/Juvenile onset Diabetes /Type A)  
☐ Type 2 (Non-insulin Dependent Diabetes Mellitus/Adult onset Diabetes/Type B)  
☐ Type unknown  
☐ Other (please specify)

---

please specify the condition

---

---

Do you have another diabetes condition need to be specified?

- ☐ Yes ☐ No

---

please specify the second condition

---

---

Do you have another diabetes condition need to be specified?

- ☐ Yes ☐ No

---

please specify the third condition

---

At what age were you first told you had Type 1  
diabetes (Insulin Dependent Diabetes Mellitus/Juvenile  
onset Diabetes /Type A)?

- |                                  |                          |                          |                          |
|----------------------------------|--------------------------|--------------------------|--------------------------|
| <input type="radio"/> 0          | <input type="radio"/> 1  | <input type="radio"/> 2  | <input type="radio"/> 3  |
| <input type="radio"/> 4          | <input type="radio"/> 5  | <input type="radio"/> 6  | <input type="radio"/> 7  |
| <input type="radio"/> 8          | <input type="radio"/> 9  | <input type="radio"/> 10 | <input type="radio"/> 11 |
| <input type="radio"/> 12         | <input type="radio"/> 13 | <input type="radio"/> 14 | <input type="radio"/> 15 |
| <input type="radio"/> 16         | <input type="radio"/> 17 | <input type="radio"/> 18 | <input type="radio"/> 19 |
| <input type="radio"/> 20         | <input type="radio"/> 21 | <input type="radio"/> 22 | <input type="radio"/> 23 |
| <input type="radio"/> 24         | <input type="radio"/> 25 | <input type="radio"/> 26 | <input type="radio"/> 27 |
| <input type="radio"/> 28         | <input type="radio"/> 29 | <input type="radio"/> 30 | <input type="radio"/> 31 |
| <input type="radio"/> 32         | <input type="radio"/> 33 | <input type="radio"/> 34 | <input type="radio"/> 35 |
| <input type="radio"/> 36         | <input type="radio"/> 37 | <input type="radio"/> 38 | <input type="radio"/> 39 |
| <input type="radio"/> 40         | <input type="radio"/> 41 | <input type="radio"/> 42 | <input type="radio"/> 43 |
| <input type="radio"/> 44         | <input type="radio"/> 45 | <input type="radio"/> 46 | <input type="radio"/> 47 |
| <input type="radio"/> 48         | <input type="radio"/> 49 | <input type="radio"/> 50 | <input type="radio"/> 51 |
| <input type="radio"/> 52         | <input type="radio"/> 53 | <input type="radio"/> 54 | <input type="radio"/> 55 |
| <input type="radio"/> 56         | <input type="radio"/> 57 | <input type="radio"/> 58 | <input type="radio"/> 59 |
| <input type="radio"/> 60         | <input type="radio"/> 61 | <input type="radio"/> 62 | <input type="radio"/> 63 |
| <input type="radio"/> 64         | <input type="radio"/> 65 | <input type="radio"/> 66 | <input type="radio"/> 67 |
| <input type="radio"/> 68         | <input type="radio"/> 69 | <input type="radio"/> 70 | <input type="radio"/> 71 |
| <input type="radio"/> 72         | <input type="radio"/> 73 | <input type="radio"/> 74 | <input type="radio"/> 75 |
| <input type="radio"/> 76         | <input type="radio"/> 77 | <input type="radio"/> 78 | <input type="radio"/> 79 |
| <input type="radio"/> 80         | <input type="radio"/> 81 | <input type="radio"/> 82 | <input type="radio"/> 83 |
| <input type="radio"/> 84         | <input type="radio"/> 85 | <input type="radio"/> 86 | <input type="radio"/> 87 |
| <input type="radio"/> 88         | <input type="radio"/> 89 | <input type="radio"/> 90 | <input type="radio"/> 91 |
| <input type="radio"/> 92         | <input type="radio"/> 93 | <input type="radio"/> 94 | <input type="radio"/> 95 |
| <input type="radio"/> 96         | <input type="radio"/> 97 | <input type="radio"/> 98 | <input type="radio"/> 99 |
| <input type="radio"/> Don't know |                          |                          |                          |



At what age were you first told you had Type 2  
diabetes (Non-insulin Dependent Diabetes  
Mellitus/Adult Onset  
Diabetes/Type B)?

- ☐ 0
- ☐ 1
- ☐ 2
- ☐ 3
- ☐ 4
- ☐ 5
- ☐ 6
- ☐ 7
- ☐ 8
- ☐ 9
- ☐ 10
- ☐ 11
- ☐ 12
- ☐ 13
- ☐ 14
- ☐ 15
- ☐ 16
- ☐ 17
- ☐ 18
- ☐ 19
- ☐ 20
- ☐ 21
- ☐ 22
- ☐ 23
- ☐ 24
- ☐ 25
- ☐ 26
- ☐ 27
- ☐ 28
- ☐ 29
- ☐ 30
- ☐ 31
- ☐ 32
- ☐ 33
- ☐ 34
- ☐ 35
- ☐ 36
- ☐ 37
- ☐ 38
- ☐ 39
- ☐ 40
- ☐ 41
- ☐ 42
- ☐ 43
- ☐ 44
- ☐ 45
- ☐ 46
- ☐ 47
- ☐ 48
- ☐ 49
- ☐ 50
- ☐ 51
- ☐ 52
- ☐ 53
- ☐ 54
- ☐ 55
- ☐ 56
- ☐ 57
- ☐ 58
- ☐ 59
- ☐ 60
- ☐ 61
- ☐ 62
- ☐ 63
- ☐ 64
- ☐ 65
- ☐ 66
- ☐ 67
- ☐ 68

- ☐ 69
- ☐ 70
- ☐ 71
- ☐ 72
- ☐ 73
- ☐ 74
- ☐ 75
- ☐ 76
- ☐ 77
- ☐ 78
- ☐ 79
- ☐ 80
- ☐ 81
- ☐ 82
- ☐ 83
- ☐ 84
- ☐ 85
- ☐ 86
- ☐ 87
- ☐ 88
- ☐ 89
- ☐ 90
- ☐ 91
- ☐ 92
- ☐ 93
- ☐ 94
- ☐ 95
- ☐ 96
- ☐ 97
- ☐ 98
- ☐ 99
- ☐ Don't know

At what age were you first told you had gestational  
(pregnancy) diabetes?

- ☐ 0
- ☐ 1
- ☐ 2
- ☐ 3
- ☐ 4
- ☐ 5
- ☐ 6
- ☐ 7
- ☐ 8
- ☐ 9
- ☐ 10
- ☐ 11
- ☐ 12
- ☐ 13
- ☐ 14
- ☐ 15
- ☐ 16
- ☐ 17
- ☐ 18
- ☐ 19
- ☐ 20
- ☐ 21
- ☐ 22
- ☐ 23
- ☐ 24
- ☐ 25
- ☐ 26
- ☐ 27
- ☐ 28
- ☐ 29
- ☐ 30
- ☐ 31
- ☐ 32
- ☐ 33
- ☐ 34
- ☐ 35
- ☐ 36
- ☐ 37
- ☐ 38
- ☐ 39
- ☐ 40
- ☐ 41
- ☐ 42
- ☐ 43
- ☐ 44
- ☐ 45
- ☐ 46
- ☐ 47
- ☐ 48
- ☐ 49
- ☐ 50
- ☐ 51
- ☐ 52
- ☐ 53
- ☐ 54
- ☐ 55
- ☐ 56
- ☐ 57
- ☐ 58
- ☐ 59
- ☐ 60
- ☐ 61
- ☐ 62
- ☐ 63
- ☐ 64
- ☐ 65
- ☐ 66
- ☐ 67
- ☐ 68

- ☐ 69
- ☐ 70
- ☐ 71
- ☐ 72
- ☐ 73
- ☐ 74
- ☐ 75
- ☐ 76
- ☐ 77
- ☐ 78
- ☐ 79
- ☐ 80
- ☐ 81
- ☐ 82
- ☐ 83
- ☐ 84
- ☐ 85
- ☐ 86
- ☐ 87
- ☐ 88
- ☐ 89
- ☐ 90
- ☐ 91
- ☐ 92
- ☐ 93
- ☐ 94
- ☐ 95
- ☐ 96
- ☐ 97
- ☐ 98
- ☐ 99
- ☐ Don't know

At what age were you first told you had diabetes insipidus?

- ☐ 0
- ☐ 1
- ☐ 2
- ☐ 3
- ☐ 4
- ☐ 5
- ☐ 6
- ☐ 7
- ☐ 8
- ☐ 9
- ☐ 10
- ☐ 11
- ☐ 12
- ☐ 13
- ☐ 14
- ☐ 15
- ☐ 16
- ☐ 17
- ☐ 18
- ☐ 19
- ☐ 20
- ☐ 21
- ☐ 22
- ☐ 23
- ☐ 24
- ☐ 25
- ☐ 26
- ☐ 27
- ☐ 28
- ☐ 29
- ☐ 30
- ☐ 31
- ☐ 32
- ☐ 33
- ☐ 34
- ☐ 35
- ☐ 36
- ☐ 37
- ☐ 38
- ☐ 39
- ☐ 40
- ☐ 41
- ☐ 42
- ☐ 43
- ☐ 44
- ☐ 45
- ☐ 46
- ☐ 47
- ☐ 48
- ☐ 49
- ☐ 50
- ☐ 51
- ☐ 52
- ☐ 53
- ☐ 54
- ☐ 55
- ☐ 56
- ☐ 57
- ☐ 58
- ☐ 59
- ☐ 60
- ☐ 61
- ☐ 62
- ☐ 63
- ☐ 64
- ☐ 65
- ☐ 66
- ☐ 67
- ☐ 68

- ☐ 69
- ☐ 70
- ☐ 71
- ☐ 72
- ☐ 73
- ☐ 74
- ☐ 75
- ☐ 76
- ☐ 77
- ☐ 78
- ☐ 79
- ☐ 80
- ☐ 81
- ☐ 82
- ☐ 83
- ☐ 84
- ☐ 85
- ☐ 86
- ☐ 87
- ☐ 88
- ☐ 89
- ☐ 90
- ☐ 91
- ☐ 92
- ☐ 93
- ☐ 94
- ☐ 95
- ☐ 96
- ☐ 97
- ☐ 98
- ☐ 99
- ☐ Don't know

At what age were you first told you had pre-diabetes  
(impaired fasting glucose, impaired glucose  
intolerance)?

- ☐ 0
- ☐ 1
- ☐ 2
- ☐ 3
- ☐ 4
- ☐ 5
- ☐ 6
- ☐ 7
- ☐ 8
- ☐ 9
- ☐ 10
- ☐ 11
- ☐ 12
- ☐ 13
- ☐ 14
- ☐ 15
- ☐ 16
- ☐ 17
- ☐ 18
- ☐ 19
- ☐ 20
- ☐ 21
- ☐ 22
- ☐ 23
- ☐ 24
- ☐ 25
- ☐ 26
- ☐ 27
- ☐ 28
- ☐ 29
- ☐ 30
- ☐ 31
- ☐ 32
- ☐ 33
- ☐ 34
- ☐ 35
- ☐ 36
- ☐ 37
- ☐ 38
- ☐ 39
- ☐ 40
- ☐ 41
- ☐ 42
- ☐ 43
- ☐ 44
- ☐ 45
- ☐ 46
- ☐ 47
- ☐ 48
- ☐ 49
- ☐ 50
- ☐ 51
- ☐ 52
- ☐ 53
- ☐ 54
- ☐ 55
- ☐ 56
- ☐ 57
- ☐ 58
- ☐ 59
- ☐ 60
- ☐ 61
- ☐ 62
- ☐ 63
- ☐ 64
- ☐ 65
- ☐ 66
- ☐ 67
- ☐ 68

- ☐ 69
- ☐ 70
- ☐ 71
- ☐ 72
- ☐ 73
- ☐ 74
- ☐ 75
- ☐ 76
- ☐ 77
- ☐ 78
- ☐ 79
- ☐ 80
- ☐ 81
- ☐ 82
- ☐ 83
- ☐ 84
- ☐ 85
- ☐ 86
- ☐ 87
- ☐ 88
- ☐ 89
- ☐ 90
- ☐ 91
- ☐ 92
- ☐ 93
- ☐ 94
- ☐ 95
- ☐ 96
- ☐ 97
- ☐ 98
- ☐ 99
- ☐ Don't know



At what age were you first told you had this condition?

- ☐ 0
- ☐ 1
- ☐ 2
- ☐ 3
- ☐ 4
- ☐ 5
- ☐ 6
- ☐ 7
- ☐ 8
- ☐ 9
- ☐ 10
- ☐ 11
- ☐ 12
- ☐ 13
- ☐ 14
- ☐ 15
- ☐ 16
- ☐ 17
- ☐ 18
- ☐ 19
- ☐ 20
- ☐ 21
- ☐ 22
- ☐ 23
- ☐ 24
- ☐ 25
- ☐ 26
- ☐ 27
- ☐ 28
- ☐ 29
- ☐ 30
- ☐ 31
- ☐ 32
- ☐ 33
- ☐ 34
- ☐ 35
- ☐ 36
- ☐ 37
- ☐ 38
- ☐ 39
- ☐ 40
- ☐ 41
- ☐ 42
- ☐ 43
- ☐ 44
- ☐ 45
- ☐ 46
- ☐ 47
- ☐ 48
- ☐ 49
- ☐ 50
- ☐ 51
- ☐ 52
- ☐ 53
- ☐ 54
- ☐ 55
- ☐ 56
- ☐ 57
- ☐ 58
- ☐ 59
- ☐ 60
- ☐ 61
- ☐ 62
- ☐ 63
- ☐ 64
- ☐ 65
- ☐ 66
- ☐ 67
- ☐ 68

- ☐ 69
- ☐ 70
- ☐ 71
- ☐ 72
- ☐ 73
- ☐ 74
- ☐ 75
- ☐ 76
- ☐ 77
- ☐ 78
- ☐ 79
- ☐ 80
- ☐ 81
- ☐ 82
- ☐ 83
- ☐ 84
- ☐ 85
- ☐ 86
- ☐ 87
- ☐ 88
- ☐ 89
- ☐ 90
- ☐ 91
- ☐ 92
- ☐ 93
- ☐ 94
- ☐ 95
- ☐ 96
- ☐ 97
- ☐ 98
- ☐ 99
- ☐ Don't know

At what age were you first told you had  
[diabetes\_others]?

- ☐ 0
- ☐ 1
- ☐ 2
- ☐ 3
- ☐ 4
- ☐ 5
- ☐ 6
- ☐ 7
- ☐ 8
- ☐ 9
- ☐ 10
- ☐ 11
- ☐ 12
- ☐ 13
- ☐ 14
- ☐ 15
- ☐ 16
- ☐ 17
- ☐ 18
- ☐ 19
- ☐ 20
- ☐ 21
- ☐ 22
- ☐ 23
- ☐ 24
- ☐ 25
- ☐ 26
- ☐ 27
- ☐ 28
- ☐ 29
- ☐ 30
- ☐ 31
- ☐ 32
- ☐ 33
- ☐ 34
- ☐ 35
- ☐ 36
- ☐ 37
- ☐ 38
- ☐ 39
- ☐ 40
- ☐ 41
- ☐ 42
- ☐ 43
- ☐ 44
- ☐ 45
- ☐ 46
- ☐ 47
- ☐ 48
- ☐ 49
- ☐ 50
- ☐ 51
- ☐ 52
- ☐ 53
- ☐ 54
- ☐ 55
- ☐ 56
- ☐ 57
- ☐ 58
- ☐ 59
- ☐ 60
- ☐ 61
- ☐ 62
- ☐ 63
- ☐ 64
- ☐ 65
- ☐ 66
- ☐ 67
- ☐ 68

- ☐ 69
- ☐ 70
- ☐ 71
- ☐ 72
- ☐ 73
- ☐ 74
- ☐ 75
- ☐ 76
- ☐ 77
- ☐ 78
- ☐ 79
- ☐ 80
- ☐ 81
- ☐ 82
- ☐ 83
- ☐ 84
- ☐ 85
- ☐ 86
- ☐ 87
- ☐ 88
- ☐ 89
- ☐ 90
- ☐ 91
- ☐ 92
- ☐ 93
- ☐ 94
- ☐ 95
- ☐ 96
- ☐ 97
- ☐ 98
- ☐ 99
- ☐ Don't know

At what age were you first told you had  
[diabetes\_others\_2]?

- ☐ 0
- ☐ 1
- ☐ 2
- ☐ 3
- ☐ 4
- ☐ 5
- ☐ 6
- ☐ 7
- ☐ 8
- ☐ 9
- ☐ 10
- ☐ 11
- ☐ 12
- ☐ 13
- ☐ 14
- ☐ 15
- ☐ 16
- ☐ 17
- ☐ 18
- ☐ 19
- ☐ 20
- ☐ 21
- ☐ 22
- ☐ 23
- ☐ 24
- ☐ 25
- ☐ 26
- ☐ 27
- ☐ 28
- ☐ 29
- ☐ 30
- ☐ 31
- ☐ 32
- ☐ 33
- ☐ 34
- ☐ 35
- ☐ 36
- ☐ 37
- ☐ 38
- ☐ 39
- ☐ 40
- ☐ 41
- ☐ 42
- ☐ 43
- ☐ 44
- ☐ 45
- ☐ 46
- ☐ 47
- ☐ 48
- ☐ 49
- ☐ 50
- ☐ 51
- ☐ 52
- ☐ 53
- ☐ 54
- ☐ 55
- ☐ 56
- ☐ 57
- ☐ 58
- ☐ 59
- ☐ 60
- ☐ 61
- ☐ 62
- ☐ 63
- ☐ 64
- ☐ 65
- ☐ 66
- ☐ 67
- ☐ 68

- ☐ 69
- ☐ 70
- ☐ 71
- ☐ 72
- ☐ 73
- ☐ 74
- ☐ 75
- ☐ 76
- ☐ 77
- ☐ 78
- ☐ 79
- ☐ 80
- ☐ 81
- ☐ 82
- ☐ 83
- ☐ 84
- ☐ 85
- ☐ 86
- ☐ 87
- ☐ 88
- ☐ 89
- ☐ 90
- ☐ 91
- ☐ 92
- ☐ 93
- ☐ 94
- ☐ 95
- ☐ 96
- ☐ 97
- ☐ 98
- ☐ 99
- ☐ Don't know

At what age were you first told you had  
[diabetes\_others\_3]?

- ☐ 0
- ☐ 1
- ☐ 2
- ☐ 3
- ☐ 4
- ☐ 5
- ☐ 6
- ☐ 7
- ☐ 8
- ☐ 9
- ☐ 10
- ☐ 11
- ☐ 12
- ☐ 13
- ☐ 14
- ☐ 15
- ☐ 16
- ☐ 17
- ☐ 18
- ☐ 19
- ☐ 20
- ☐ 21
- ☐ 22
- ☐ 23
- ☐ 24
- ☐ 25
- ☐ 26
- ☐ 27
- ☐ 28
- ☐ 29
- ☐ 30
- ☐ 31
- ☐ 32
- ☐ 33
- ☐ 34
- ☐ 35
- ☐ 36
- ☐ 37
- ☐ 38
- ☐ 39
- ☐ 40
- ☐ 41
- ☐ 42
- ☐ 43
- ☐ 44
- ☐ 45
- ☐ 46
- ☐ 47
- ☐ 48
- ☐ 49
- ☐ 50
- ☐ 51
- ☐ 52
- ☐ 53
- ☐ 54
- ☐ 55
- ☐ 56
- ☐ 57
- ☐ 58
- ☐ 59
- ☐ 60
- ☐ 61
- ☐ 62
- ☐ 63
- ☐ 64
- ☐ 65
- ☐ 66
- ☐ 67
- ☐ 68

- ☐ 69
- ☐ 70
- ☐ 71
- ☐ 72
- ☐ 73
- ☐ 74
- ☐ 75
- ☐ 76
- ☐ 77
- ☐ 78
- ☐ 79
- ☐ 80
- ☐ 81
- ☐ 82
- ☐ 83
- ☐ 84
- ☐ 85
- ☐ 86
- ☐ 87
- ☐ 88
- ☐ 89
- ☐ 90
- ☐ 91
- ☐ 92
- ☐ 93
- ☐ 94
- ☐ 95
- ☐ 96
- ☐ 97
- ☐ 98
- ☐ 99
- ☐ Don't know

---

Do you still have Type 1/Type A diabetes?

- ☐ Yes
- ☐ No
- ☐ Don't know

---

Do you still have Type 2/Type B diabetes?

- ☐ Yes
- ☐ No
- ☐ Don't know

---

Do you still have gestational diabetes?

- ☐ Yes
- ☐ No
- ☐ Don't know

---

Do you still have diabetes insipidus?

- ☐ Yes
- ☐ No
- ☐ Don't know

---

Do you still have pre-diabetes?

- ☐ Yes
- ☐ No
- ☐ Don't know

---

Do you still have this condition?

- ☐ Yes
- ☐ No
- ☐ Don't know

---

Do you still have [diabetes\_others]?

- ☐ Yes
- ☐ No
- ☐ Don't know



---

Do you still have [diabetes\_others\_2]?

- ☐ Yes  
☐ No  
☐ Don't know
- 

Do you still have [diabetes\_others\_3]?

- ☐ Yes  
☐ No  
☐ Don't know
- 

How is Type 1 diabetes (Insulin Dependent Diabetes Mellitus/Juvenile Onset Diabetes /Type A) treated?  
(Tick all that apply)

- ☐ no treatment   ☐ diet   ☐ exercise   ☐ medication (please specify)   ☐ natural/herbal therapy (please specify)  
☐ weight management   ☐ supplements (please specify)   ☐ other (please specify)  
☐ Don't know
- 

please specify the medication

---

please specify the natural/herbal therapy

---

please specify the supplements

---

please specify the treatment

---

How is Type 2 diabetes (Non-insulin Dependent Diabetes Mellitus/Adult Onset Diabetes/Type B treated?  
(Tick all that apply)

- ☐ no treatment   ☐ diet   ☐ exercise   ☐ medication (please specify)   ☐ natural/herbal therapy (please specify)  
☐ weight management   ☐ supplements (please specify)   ☐ other (please specify)  
☐ Don't know
- 

please specify the medication

---

please specify the natural/herbal therapy

---

please specify the supplements

---

please specify the treatment

---

---

How is gestational (pregnancy) diabetes treated?

(Tick all that apply)

- ☐ no treatment   ☐ diet   ☐ exercise   ☐ medication (please specify)   ☐ natural/herbal therapy (please specify)   ☐ weight management   ☐ supplements (please specify)   ☐ other (please specify)  
☐ Don't know

---

please specify the medication

---

---

please specify the natural/herbal therapy

---

---

please specify the supplements

---

---

please specify the treatment

---

---

How is diabetes insipidus treated?

(Tick all that apply)

- ☐ no treatment   ☐ diet   ☐ exercise   ☐ medication (please specify)   ☐ natural/herbal therapy (please specify)   ☐ weight management   ☐ supplements (please specify)   ☐ other (please specify)  
☐ Don't know

---

please specify the medication

---

---

please specify the natural/herbal therapy

---

---

please specify the supplements

---

---

please specify the treatment

---

---

How is pre-diabetes (impaired fasting glucose, impaired glucose tolerance) treated?

(Tick all that apply)

- ☐ no treatment   ☐ diet   ☐ exercise   ☐ medication (please specify)   ☐ natural/herbal therapy (please specify)   ☐ weight management   ☐ supplements (please specify)   ☐ other (please specify)  
☐ Don't know

---

please specify the medication

---

---

please specify the natural/herbal therapy

---

---

please specify the supplements

---

---

please specify the treatment

---

---

How is this condition treated?

(Tick all that apply)

- ☐ no treatment   ☐ diet   ☐ exercise   ☐ medication (please specify)   ☐ natural/herbal therapy (please specify)   ☐ weight management   ☐ supplements (please specify)   ☐ other (please specify)  
☐ Don't know

---

please specify the medication

---

---

please specify the natural/herbal therapy

---

---

please specify the supplements

---

---

please specify the treatment

---

---

How is [diabetes\_others] treated?

(Tick all that apply)

- ☐ no treatment   ☐ diet   ☐ exercise   ☐ medication (please specify)   ☐ natural/herbal therapy (please specify)   ☐ weight management   ☐ supplements (please specify)   ☐ other (please specify)  
☐ Don't know

---

please specify the medication

---

---

please specify the natural/herbal therapy

---

---

please specify the supplements

---

---

please specify the treatment

---

---

How is [diabetes\_others\_2] treated?

(Tick all that apply)

- ☐ no treatment   ☐ diet   ☐ exercise   ☐ medication (please specify)   ☐ natural/herbal therapy (please specify)   ☐ weight management   ☐ supplements (please specify)   ☐ other (please specify)  
☐ Don't know

---

please specify the medication

---

---

please specify the natural/herbal therapy

---

---

please specify the supplements

---

---

please specify the treatment

---

---

How is [diabetes\_others\_3] treated?

(Tick all that apply)

- ☐ no treatment   ☐ diet   ☐ exercise   ☐ medication (please specify)   ☐ natural/herbal therapy (please specify)   ☐ weight management   ☐ supplements (please specify)   ☐ other (please specify)  
☐ Don't know

---

please specify the medication

---

---

please specify the natural/herbal therapy

---

---

please specify the supplements

---

---

please specify the treatment

---

---

Have either of your parents, or any of brothers or sisters ever been told by a doctor (GP or specialist) or nurse that they have Diabetes?

- ☐ Yes  
☐ No  
☐ Don't know

---

Including any conditions which can be controlled with medication, have you ever been told by a doctor (GP or specialist) or nurse that you have osteoporosis or osteopenia?

(Osteopenia is a mild loss of bone density that may progress to osteoporosis.)

- ☐ Yes  
☐ No  
☐ Don't know

---

Which one were you told you have?

- ☐ Osteoporosis  
☐ Osteopenia  
☐ Don't Know  
(Tick all that apply)

---

At what age were you first told you had osteoporosis?

- ☐ 0
- ☐ 1
- ☐ 2
- ☐ 3
- ☐ 4
- ☐ 5
- ☐ 6
- ☐ 7
- ☐ 8
- ☐ 9
- ☐ 10
- ☐ 11
- ☐ 12
- ☐ 13
- ☐ 14
- ☐ 15
- ☐ 16
- ☐ 17
- ☐ 18
- ☐ 19
- ☐ 20
- ☐ 21
- ☐ 22
- ☐ 23
- ☐ 24
- ☐ 25
- ☐ 26
- ☐ 27
- ☐ 28
- ☐ 29
- ☐ 30
- ☐ 31
- ☐ 32
- ☐ 33
- ☐ 34
- ☐ 35
- ☐ 36
- ☐ 37
- ☐ 38
- ☐ 39
- ☐ 40
- ☐ 41
- ☐ 42
- ☐ 43
- ☐ 44
- ☐ 45
- ☐ 46
- ☐ 47
- ☐ 48
- ☐ 49
- ☐ 50
- ☐ 51
- ☐ 52
- ☐ 53
- ☐ 54
- ☐ 55
- ☐ 56
- ☐ 57
- ☐ 58
- ☐ 59
- ☐ 60
- ☐ 61
- ☐ 62
- ☐ 63
- ☐ 64
- ☐ 65
- ☐ 66
- ☐ 67
- ☐ 68

- ☐ 69
- ☐ 70
- ☐ 71
- ☐ 72
- ☐ 73
- ☐ 74
- ☐ 75
- ☐ 76
- ☐ 77
- ☐ 78
- ☐ 79
- ☐ 80
- ☐ 81
- ☐ 82
- ☐ 83
- ☐ 84
- ☐ 85
- ☐ 86
- ☐ 87
- ☐ 88
- ☐ 89
- ☐ 90
- ☐ 91
- ☐ 92
- ☐ 93
- ☐ 94
- ☐ 95
- ☐ 96
- ☐ 97
- ☐ 98
- ☐ 99
- ☐ Don't know

---

At what age were you first told you had osteopenia?

- ☐ 0
- ☐ 1
- ☐ 2
- ☐ 3
- ☐ 4
- ☐ 5
- ☐ 6
- ☐ 7
- ☐ 8
- ☐ 9
- ☐ 10
- ☐ 11
- ☐ 12
- ☐ 13
- ☐ 14
- ☐ 15
- ☐ 16
- ☐ 17
- ☐ 18
- ☐ 19
- ☐ 20
- ☐ 21
- ☐ 22
- ☐ 23
- ☐ 24
- ☐ 25
- ☐ 26
- ☐ 27
- ☐ 28
- ☐ 29
- ☐ 30
- ☐ 31
- ☐ 32
- ☐ 33
- ☐ 34
- ☐ 35
- ☐ 36
- ☐ 37
- ☐ 38
- ☐ 39
- ☐ 40
- ☐ 41
- ☐ 42
- ☐ 43
- ☐ 44
- ☐ 45
- ☐ 46
- ☐ 47
- ☐ 48
- ☐ 49
- ☐ 50
- ☐ 51
- ☐ 52
- ☐ 53
- ☐ 54
- ☐ 55
- ☐ 56
- ☐ 57
- ☐ 58
- ☐ 59
- ☐ 60
- ☐ 61
- ☐ 62
- ☐ 63
- ☐ 64
- ☐ 65
- ☐ 66
- ☐ 67
- ☐ 68

- ☐ 69
- ☐ 70
- ☐ 71
- ☐ 72
- ☐ 73
- ☐ 74
- ☐ 75
- ☐ 76
- ☐ 77
- ☐ 78
- ☐ 79
- ☐ 80
- ☐ 81
- ☐ 82
- ☐ 83
- ☐ 84
- ☐ 85
- ☐ 86
- ☐ 87
- ☐ 88
- ☐ 89
- ☐ 90
- ☐ 91
- ☐ 92
- ☐ 93
- ☐ 94
- ☐ 95
- ☐ 96
- ☐ 97
- ☐ 98
- ☐ 99
- ☐ Don't know



At what age were you first told you had this condition?

- ☐ 0
- ☐ 1
- ☐ 2
- ☐ 3
- ☐ 4
- ☐ 5
- ☐ 6
- ☐ 7
- ☐ 8
- ☐ 9
- ☐ 10
- ☐ 11
- ☐ 12
- ☐ 13
- ☐ 14
- ☐ 15
- ☐ 16
- ☐ 17
- ☐ 18
- ☐ 19
- ☐ 20
- ☐ 21
- ☐ 22
- ☐ 23
- ☐ 24
- ☐ 25
- ☐ 26
- ☐ 27
- ☐ 28
- ☐ 29
- ☐ 30
- ☐ 31
- ☐ 32
- ☐ 33
- ☐ 34
- ☐ 35
- ☐ 36
- ☐ 37
- ☐ 38
- ☐ 39
- ☐ 40
- ☐ 41
- ☐ 42
- ☐ 43
- ☐ 44
- ☐ 45
- ☐ 46
- ☐ 47
- ☐ 48
- ☐ 49
- ☐ 50
- ☐ 51
- ☐ 52
- ☐ 53
- ☐ 54
- ☐ 55
- ☐ 56
- ☐ 57
- ☐ 58
- ☐ 59
- ☐ 60
- ☐ 61
- ☐ 62
- ☐ 63
- ☐ 64
- ☐ 65
- ☐ 66
- ☐ 67
- ☐ 68

- ☐ 69
- ☐ 70
- ☐ 71
- ☐ 72
- ☐ 73
- ☐ 74
- ☐ 75
- ☐ 76
- ☐ 77
- ☐ 78
- ☐ 79
- ☐ 80
- ☐ 81
- ☐ 82
- ☐ 83
- ☐ 84
- ☐ 85
- ☐ 86
- ☐ 87
- ☐ 88
- ☐ 89
- ☐ 90
- ☐ 91
- ☐ 92
- ☐ 93
- ☐ 94
- ☐ 95
- ☐ 96
- ☐ 97
- ☐ 98
- ☐ 99
- ☐ Don't know

---

Do you still have osteoporosis?

- ☐ Yes
- ☐ No
- ☐ Don't know

---

Do you still have osteopenia?

- ☐ Yes
- ☐ No
- ☐ Don't know

---

Do you still have this condition?

- ☐ Yes
- ☐ No
- ☐ Don't know

---

How is osteoporosis treated?  
(Tick all that apply)

- ☐ no treatment  
 ☐ diet  
 ☐ exercise  
 ☐ medication (please specify)  
 ☐ natural/herbal therapy (please specify)  
 ☐ weight management  
 ☐ supplements (please specify)  
 ☐ other (please specify)  
 ☐ Don't know

---

please specify the medication

\_\_\_\_\_

---

please specify the natural/herbal therapy

\_\_\_\_\_

---

please specify the supplements

\_\_\_\_\_

---

please specify the treatment

---

---

How is osteopenia treated?  
(Tick all that apply)

- ☐ no treatment   ☐ diet   ☐ exercise   ☐ medication (please specify)   ☐ natural/herbal therapy (please specify)  
☐ weight management   ☐ supplements (please specify)   ☐ other (please specify)  
☐ Don't know
- 

please specify the medication

---

please specify the natural/herbal therapy

---

please specify the supplements

---

please specify the treatment

---

---

How is this condition treated?  
(Tick all that apply)

- ☐ no treatment   ☐ diet   ☐ exercise   ☐ medication (please specify)   ☐ natural/herbal therapy (please specify)  
☐ weight management   ☐ supplements (please specify)   ☐ other (please specify)  
☐ Don't know
- 

please specify the medication

---

please specify the natural/herbal therapy

---

please specify the supplements

---

please specify the treatment

---

---

Have either of your parents, or any of brothers or sisters ever been told by a doctor (GP or specialist) that they have osteoporosis or osteopaenia?

- ☐ Yes  
☐ No  
☐ Don't know
- 

Which best describes the \*regularity of your usual menstrual periods between ages 20 and 35 when you were neither pregnant nor using oral contraceptives?

- ☐ Very regular  
☐ Usually regular  
☐ Usually irregular  
☐ Very irregular
- 

\*Regular periods are between 26 and 34 days. Irregular periods are 35 days or more between periods

---

Between the ages of 20 and 35, did you ever experience amenorrhoea (no periods for more than 3 months) when you were neither pregnant nor using oral contraceptives?

- ☐ Yes  
☐ No  
☐ Don't know
-

---

Have you ever been told by a doctor (GP or specialist)  
or nurse that you have gout, osteoarthritis or  
rheumatoid arthritis?

- ☐ Yes  
☐ No  
☐ Don't know
- 

Which one were you told you have?  
(Tick any that apply)

☐ Gout   ☐ Osteoarthritis   ☐ Rheumatoid arthritis   ☐ Don't know

---

At what age were you first told you had gout?

- ☐ 0
- ☐ 1
- ☐ 2
- ☐ 3
- ☐ 4
- ☐ 5
- ☐ 6
- ☐ 7
- ☐ 8
- ☐ 9
- ☐ 10
- ☐ 11
- ☐ 12
- ☐ 13
- ☐ 14
- ☐ 15
- ☐ 16
- ☐ 17
- ☐ 18
- ☐ 19
- ☐ 20
- ☐ 21
- ☐ 22
- ☐ 23
- ☐ 24
- ☐ 25
- ☐ 26
- ☐ 27
- ☐ 28
- ☐ 29
- ☐ 30
- ☐ 31
- ☐ 32
- ☐ 33
- ☐ 34
- ☐ 35
- ☐ 36
- ☐ 37
- ☐ 38
- ☐ 39
- ☐ 40
- ☐ 41
- ☐ 42
- ☐ 43
- ☐ 44
- ☐ 45
- ☐ 46
- ☐ 47
- ☐ 48
- ☐ 49
- ☐ 50
- ☐ 51
- ☐ 52
- ☐ 53
- ☐ 54
- ☐ 55
- ☐ 56
- ☐ 57
- ☐ 58
- ☐ 59
- ☐ 60
- ☐ 61
- ☐ 62
- ☐ 63
- ☐ 64
- ☐ 65
- ☐ 66
- ☐ 67
- ☐ 68

- ☐ 69
- ☐ 70
- ☐ 71
- ☐ 72
- ☐ 73
- ☐ 74
- ☐ 75
- ☐ 76
- ☐ 77
- ☐ 78
- ☐ 79
- ☐ 80
- ☐ 81
- ☐ 82
- ☐ 83
- ☐ 84
- ☐ 85
- ☐ 86
- ☐ 87
- ☐ 88
- ☐ 89
- ☐ 90
- ☐ 91
- ☐ 92
- ☐ 93
- ☐ 94
- ☐ 95
- ☐ 96
- ☐ 97
- ☐ 98
- ☐ 99
- ☐ Don't know

At what age were you first told you had  
osteoarthritis?

- ☐ 0
- ☐ 1
- ☐ 2
- ☐ 3
- ☐ 4
- ☐ 5
- ☐ 6
- ☐ 7
- ☐ 8
- ☐ 9
- ☐ 10
- ☐ 11
- ☐ 12
- ☐ 13
- ☐ 14
- ☐ 15
- ☐ 16
- ☐ 17
- ☐ 18
- ☐ 19
- ☐ 20
- ☐ 21
- ☐ 22
- ☐ 23
- ☐ 24
- ☐ 25
- ☐ 26
- ☐ 27
- ☐ 28
- ☐ 29
- ☐ 30
- ☐ 31
- ☐ 32
- ☐ 33
- ☐ 34
- ☐ 35
- ☐ 36
- ☐ 37
- ☐ 38
- ☐ 39
- ☐ 40
- ☐ 41
- ☐ 42
- ☐ 43
- ☐ 44
- ☐ 45
- ☐ 46
- ☐ 47
- ☐ 48
- ☐ 49
- ☐ 50
- ☐ 51
- ☐ 52
- ☐ 53
- ☐ 54
- ☐ 55
- ☐ 56
- ☐ 57
- ☐ 58
- ☐ 59
- ☐ 60
- ☐ 61
- ☐ 62
- ☐ 63
- ☐ 64
- ☐ 65
- ☐ 66
- ☐ 67
- ☐ 68

- ☐ 69
- ☐ 70
- ☐ 71
- ☐ 72
- ☐ 73
- ☐ 74
- ☐ 75
- ☐ 76
- ☐ 77
- ☐ 78
- ☐ 79
- ☐ 80
- ☐ 81
- ☐ 82
- ☐ 83
- ☐ 84
- ☐ 85
- ☐ 86
- ☐ 87
- ☐ 88
- ☐ 89
- ☐ 90
- ☐ 91
- ☐ 92
- ☐ 93
- ☐ 94
- ☐ 95
- ☐ 96
- ☐ 97
- ☐ 98
- ☐ 99
- ☐ Don't know



At what age were you first told you had rheumatoid arthritis?

- ☐ 0
- ☐ 1
- ☐ 2
- ☐ 3
- ☐ 4
- ☐ 5
- ☐ 6
- ☐ 7
- ☐ 8
- ☐ 9
- ☐ 10
- ☐ 11
- ☐ 12
- ☐ 13
- ☐ 14
- ☐ 15
- ☐ 16
- ☐ 17
- ☐ 18
- ☐ 19
- ☐ 20
- ☐ 21
- ☐ 22
- ☐ 23
- ☐ 24
- ☐ 25
- ☐ 26
- ☐ 27
- ☐ 28
- ☐ 29
- ☐ 30
- ☐ 31
- ☐ 32
- ☐ 33
- ☐ 34
- ☐ 35
- ☐ 36
- ☐ 37
- ☐ 38
- ☐ 39
- ☐ 40
- ☐ 41
- ☐ 42
- ☐ 43
- ☐ 44
- ☐ 45
- ☐ 46
- ☐ 47
- ☐ 48
- ☐ 49
- ☐ 50
- ☐ 51
- ☐ 52
- ☐ 53
- ☐ 54
- ☐ 55
- ☐ 56
- ☐ 57
- ☐ 58
- ☐ 59
- ☐ 60
- ☐ 61
- ☐ 62
- ☐ 63
- ☐ 64
- ☐ 65
- ☐ 66
- ☐ 67
- ☐ 68

- ☐ 69
- ☐ 70
- ☐ 71
- ☐ 72
- ☐ 73
- ☐ 74
- ☐ 75
- ☐ 76
- ☐ 77
- ☐ 78
- ☐ 79
- ☐ 80
- ☐ 81
- ☐ 82
- ☐ 83
- ☐ 84
- ☐ 85
- ☐ 86
- ☐ 87
- ☐ 88
- ☐ 89
- ☐ 90
- ☐ 91
- ☐ 92
- ☐ 93
- ☐ 94
- ☐ 95
- ☐ 96
- ☐ 97
- ☐ 98
- ☐ 99
- ☐ Don't know

At what age were you first told you had this condition?

- ☐ 0
- ☐ 1
- ☐ 2
- ☐ 3
- ☐ 4
- ☐ 5
- ☐ 6
- ☐ 7
- ☐ 8
- ☐ 9
- ☐ 10
- ☐ 11
- ☐ 12
- ☐ 13
- ☐ 14
- ☐ 15
- ☐ 16
- ☐ 17
- ☐ 18
- ☐ 19
- ☐ 20
- ☐ 21
- ☐ 22
- ☐ 23
- ☐ 24
- ☐ 25
- ☐ 26
- ☐ 27
- ☐ 28
- ☐ 29
- ☐ 30
- ☐ 31
- ☐ 32
- ☐ 33
- ☐ 34
- ☐ 35
- ☐ 36
- ☐ 37
- ☐ 38
- ☐ 39
- ☐ 40
- ☐ 41
- ☐ 42
- ☐ 43
- ☐ 44
- ☐ 45
- ☐ 46
- ☐ 47
- ☐ 48
- ☐ 49
- ☐ 50
- ☐ 51
- ☐ 52
- ☐ 53
- ☐ 54
- ☐ 55
- ☐ 56
- ☐ 57
- ☐ 58
- ☐ 59
- ☐ 60
- ☐ 61
- ☐ 62
- ☐ 63
- ☐ 64
- ☐ 65
- ☐ 66
- ☐ 67
- ☐ 68

- ☐ 69
- ☐ 70
- ☐ 71
- ☐ 72
- ☐ 73
- ☐ 74
- ☐ 75
- ☐ 76
- ☐ 77
- ☐ 78
- ☐ 79
- ☐ 80
- ☐ 81
- ☐ 82
- ☐ 83
- ☐ 84
- ☐ 85
- ☐ 86
- ☐ 87
- ☐ 88
- ☐ 89
- ☐ 90
- ☐ 91
- ☐ 92
- ☐ 93
- ☐ 94
- ☐ 95
- ☐ 96
- ☐ 97
- ☐ 98
- ☐ 99
- ☐ Don't know

---

Do you still have gout?

- ☐ Yes
- ☐ No
- ☐ Don't know

---

Do you still have osteoarthritis?

- ☐ Yes
- ☐ No
- ☐ Don't know

---

Do you still have rheumatoid arthritis?

- ☐ Yes
- ☐ No
- ☐ Don't know

---

Do you still have this condition?

- ☐ Yes
- ☐ No
- ☐ Don't know

---

How is gout treated?  
(Tick all that apply)

- ☐ no treatment  
 ☐ diet  
 ☐ exercise  
 ☐ medication (please specify)  
 ☐ natural/herbal therapy (please specify)  
 ☐ weight management  
 ☐ supplements (please specify)  
 ☐ other (please specify)  
 ☐ Don't know

---

please specify the medication

---



---

please specify the natural/herbal therapy

---

---

please specify the supplements

---

---

please specify the treatment

---

---

How is osteoarthritis treated?  
(Tick all that apply)

- ☐ no treatment   ☐ diet   ☐ exercise   ☐ medication (please specify)   ☐ natural/herbal therapy (please specify)  
☐ weight management   ☐ supplements (please specify)   ☐ other (please specify)  
☐ Don't know
- 

---

please specify the medication

---

---

please specify the natural/herbal therapy

---

---

please specify the supplements

---

---

please specify the treatment

---

---

How is rheumatoid arthritis treated?  
(Tick all that apply)

- ☐ no treatment   ☐ diet   ☐ exercise   ☐ medication (please specify)   ☐ natural/herbal therapy (please specify)  
☐ weight management   ☐ supplements (please specify)   ☐ other (please specify)  
☐ Don't know
- 

---

please specify the medication

---

---

please specify the natural/herbal therapy

---

---

please specify the supplements

---

---

please specify the treatment

---

---

How is this condition treated?  
(Tick all that apply)

- ☐ no treatment   ☐ diet   ☐ exercise   ☐ medication (please specify)   ☐ natural/herbal therapy (please specify)  
☐ weight management   ☐ supplements (please specify)   ☐ other (please specify)  
☐ Don't know
- 

---

please specify the medication

---

---

please specify the natural/herbal therapy

---

---

please specify the supplements

---

---

please specify the treatment

---

---

Have either of your parents, or any of brothers or sisters ever been told by a doctor (GP or specialist) or nurse that they have gout, osteoarthritis or rheumatoid arthritis?

- ☐ Yes  
☐ No  
☐ Don't know

---

Have you ever been told by a doctor (GP or specialist) or nurse that you have any type of cancer?

- ☐ Yes  
☐ No  
☐ Don't know

---

What type/s of cancer were you told you had?  
(Tick all that apply)

- ☐ Bladder/kidney cancer  
☐ Breast cancer  
☐ Cancer of unknown primary site  
☐ Cervical cancer  
☐ Cancer of other female reproductive organs (include uterus, ovary)  
☐ Colon/rectum/bowel cancer (colorectal)  
☐ Leukaemia  
☐ Lung cancer (include trachea, pleura and bronchus)  
☐ Non-Hodgkin lymphoma  
☐ Other type of lymphoma  
☐ Prostate cancer  
☐ Skin cancer (include melanoma, basal cell carcinoma, squamous cell carcinoma)  
☐ Stomach cancer  
☐ Other cancer (please specify)  
☐ Don't Know

---

please specify the type of cancer

---

---

Do you have another type of cancer need to be specified?

- ☐ Yes ☐ No

---

please specify the second type of cancer

---

---

Do you have another type of cancer need to be specified?

- ☐ Yes ☐ No

---

please specify the type of cancer

---

At what age were you first told you had skin cancer  
(include melanoma, basal cell carcinoma, squamous cell  
carcinoma)?

- ☐ 0
- ☐ 1
- ☐ 2
- ☐ 3
- ☐ 4
- ☐ 5
- ☐ 6
- ☐ 7
- ☐ 8
- ☐ 9
- ☐ 10
- ☐ 11
- ☐ 12
- ☐ 13
- ☐ 14
- ☐ 15
- ☐ 16
- ☐ 17
- ☐ 18
- ☐ 19
- ☐ 20
- ☐ 21
- ☐ 22
- ☐ 23
- ☐ 24
- ☐ 25
- ☐ 26
- ☐ 27
- ☐ 28
- ☐ 29
- ☐ 30
- ☐ 31
- ☐ 32
- ☐ 33
- ☐ 34
- ☐ 35
- ☐ 36
- ☐ 37
- ☐ 38
- ☐ 39
- ☐ 40
- ☐ 41
- ☐ 42
- ☐ 43
- ☐ 44
- ☐ 45
- ☐ 46
- ☐ 47
- ☐ 48
- ☐ 49
- ☐ 50
- ☐ 51
- ☐ 52
- ☐ 53
- ☐ 54
- ☐ 55
- ☐ 56
- ☐ 57
- ☐ 58
- ☐ 59
- ☐ 60
- ☐ 61
- ☐ 62
- ☐ 63
- ☐ 64
- ☐ 65
- ☐ 66
- ☐ 67
- ☐ 68

- ☐ 69
- ☐ 70
- ☐ 71
- ☐ 72
- ☐ 73
- ☐ 74
- ☐ 75
- ☐ 76
- ☐ 77
- ☐ 78
- ☐ 79
- ☐ 80
- ☐ 81
- ☐ 82
- ☐ 83
- ☐ 84
- ☐ 85
- ☐ 86
- ☐ 87
- ☐ 88
- ☐ 89
- ☐ 90
- ☐ 91
- ☐ 92
- ☐ 93
- ☐ 94
- ☐ 95
- ☐ 96
- ☐ 97
- ☐ 98
- ☐ 99
- ☐ Don't know



At what age were you first told you had  
colon/rectum/bowel cancer (colorectal)?

- ☐ 0
- ☐ 1
- ☐ 2
- ☐ 3
- ☐ 4
- ☐ 5
- ☐ 6
- ☐ 7
- ☐ 8
- ☐ 9
- ☐ 10
- ☐ 11
- ☐ 12
- ☐ 13
- ☐ 14
- ☐ 15
- ☐ 16
- ☐ 17
- ☐ 18
- ☐ 19
- ☐ 20
- ☐ 21
- ☐ 22
- ☐ 23
- ☐ 24
- ☐ 25
- ☐ 26
- ☐ 27
- ☐ 28
- ☐ 29
- ☐ 30
- ☐ 31
- ☐ 32
- ☐ 33
- ☐ 34
- ☐ 35
- ☐ 36
- ☐ 37
- ☐ 38
- ☐ 39
- ☐ 40
- ☐ 41
- ☐ 42
- ☐ 43
- ☐ 44
- ☐ 45
- ☐ 46
- ☐ 47
- ☐ 48
- ☐ 49
- ☐ 50
- ☐ 51
- ☐ 52
- ☐ 53
- ☐ 54
- ☐ 55
- ☐ 56
- ☐ 57
- ☐ 58
- ☐ 59
- ☐ 60
- ☐ 61
- ☐ 62
- ☐ 63
- ☐ 64
- ☐ 65
- ☐ 66
- ☐ 67
- ☐ 68

- ☐ 69
- ☐ 70
- ☐ 71
- ☐ 72
- ☐ 73
- ☐ 74
- ☐ 75
- ☐ 76
- ☐ 77
- ☐ 78
- ☐ 79
- ☐ 80
- ☐ 81
- ☐ 82
- ☐ 83
- ☐ 84
- ☐ 85
- ☐ 86
- ☐ 87
- ☐ 88
- ☐ 89
- ☐ 90
- ☐ 91
- ☐ 92
- ☐ 93
- ☐ 94
- ☐ 95
- ☐ 96
- ☐ 97
- ☐ 98
- ☐ 99
- ☐ Don't know

---

At what age were you first told you had breast cancer?

- ☐ 0
- ☐ 1
- ☐ 2
- ☐ 3
- ☐ 4
- ☐ 5
- ☐ 6
- ☐ 7
- ☐ 8
- ☐ 9
- ☐ 10
- ☐ 11
- ☐ 12
- ☐ 13
- ☐ 14
- ☐ 15
- ☐ 16
- ☐ 17
- ☐ 18
- ☐ 19
- ☐ 20
- ☐ 21
- ☐ 22
- ☐ 23
- ☐ 24
- ☐ 25
- ☐ 26
- ☐ 27
- ☐ 28
- ☐ 29
- ☐ 30
- ☐ 31
- ☐ 32
- ☐ 33
- ☐ 34
- ☐ 35
- ☐ 36
- ☐ 37
- ☐ 38
- ☐ 39
- ☐ 40
- ☐ 41
- ☐ 42
- ☐ 43
- ☐ 44
- ☐ 45
- ☐ 46
- ☐ 47
- ☐ 48
- ☐ 49
- ☐ 50
- ☐ 51
- ☐ 52
- ☐ 53
- ☐ 54
- ☐ 55
- ☐ 56
- ☐ 57
- ☐ 58
- ☐ 59
- ☐ 60
- ☐ 61
- ☐ 62
- ☐ 63
- ☐ 64
- ☐ 65
- ☐ 66
- ☐ 67
- ☐ 68

- ☐ 69
- ☐ 70
- ☐ 71
- ☐ 72
- ☐ 73
- ☐ 74
- ☐ 75
- ☐ 76
- ☐ 77
- ☐ 78
- ☐ 79
- ☐ 80
- ☐ 81
- ☐ 82
- ☐ 83
- ☐ 84
- ☐ 85
- ☐ 86
- ☐ 87
- ☐ 88
- ☐ 89
- ☐ 90
- ☐ 91
- ☐ 92
- ☐ 93
- ☐ 94
- ☐ 95
- ☐ 96
- ☐ 97
- ☐ 98
- ☐ 99
- ☐ Don't know

At what age were you first told you had prostate cancer?

- ☐ 0
- ☐ 1
- ☐ 2
- ☐ 3
- ☐ 4
- ☐ 5
- ☐ 6
- ☐ 7
- ☐ 8
- ☐ 9
- ☐ 10
- ☐ 11
- ☐ 12
- ☐ 13
- ☐ 14
- ☐ 15
- ☐ 16
- ☐ 17
- ☐ 18
- ☐ 19
- ☐ 20
- ☐ 21
- ☐ 22
- ☐ 23
- ☐ 24
- ☐ 25
- ☐ 26
- ☐ 27
- ☐ 28
- ☐ 29
- ☐ 30
- ☐ 31
- ☐ 32
- ☐ 33
- ☐ 34
- ☐ 35
- ☐ 36
- ☐ 37
- ☐ 38
- ☐ 39
- ☐ 40
- ☐ 41
- ☐ 42
- ☐ 43
- ☐ 44
- ☐ 45
- ☐ 46
- ☐ 47
- ☐ 48
- ☐ 49
- ☐ 50
- ☐ 51
- ☐ 52
- ☐ 53
- ☐ 54
- ☐ 55
- ☐ 56
- ☐ 57
- ☐ 58
- ☐ 59
- ☐ 60
- ☐ 61
- ☐ 62
- ☐ 63
- ☐ 64
- ☐ 65
- ☐ 66
- ☐ 67
- ☐ 68

- ☐ 69
- ☐ 70
- ☐ 71
- ☐ 72
- ☐ 73
- ☐ 74
- ☐ 75
- ☐ 76
- ☐ 77
- ☐ 78
- ☐ 79
- ☐ 80
- ☐ 81
- ☐ 82
- ☐ 83
- ☐ 84
- ☐ 85
- ☐ 86
- ☐ 87
- ☐ 88
- ☐ 89
- ☐ 90
- ☐ 91
- ☐ 92
- ☐ 93
- ☐ 94
- ☐ 95
- ☐ 96
- ☐ 97
- ☐ 98
- ☐ 99
- ☐ Don't know

At what age were you first told you had lung cancer  
(include trachea, pleura and bronchus)?

- ☐ 0
- ☐ 1
- ☐ 2
- ☐ 3
- ☐ 4
- ☐ 5
- ☐ 6
- ☐ 7
- ☐ 8
- ☐ 9
- ☐ 10
- ☐ 11
- ☐ 12
- ☐ 13
- ☐ 14
- ☐ 15
- ☐ 16
- ☐ 17
- ☐ 18
- ☐ 19
- ☐ 20
- ☐ 21
- ☐ 22
- ☐ 23
- ☐ 24
- ☐ 25
- ☐ 26
- ☐ 27
- ☐ 28
- ☐ 29
- ☐ 30
- ☐ 31
- ☐ 32
- ☐ 33
- ☐ 34
- ☐ 35
- ☐ 36
- ☐ 37
- ☐ 38
- ☐ 39
- ☐ 40
- ☐ 41
- ☐ 42
- ☐ 43
- ☐ 44
- ☐ 45
- ☐ 46
- ☐ 47
- ☐ 48
- ☐ 49
- ☐ 50
- ☐ 51
- ☐ 52
- ☐ 53
- ☐ 54
- ☐ 55
- ☐ 56
- ☐ 57
- ☐ 58
- ☐ 59
- ☐ 60
- ☐ 61
- ☐ 62
- ☐ 63
- ☐ 64
- ☐ 65
- ☐ 66
- ☐ 67
- ☐ 68

- ☐ 69
- ☐ 70
- ☐ 71
- ☐ 72
- ☐ 73
- ☐ 74
- ☐ 75
- ☐ 76
- ☐ 77
- ☐ 78
- ☐ 79
- ☐ 80
- ☐ 81
- ☐ 82
- ☐ 83
- ☐ 84
- ☐ 85
- ☐ 86
- ☐ 87
- ☐ 88
- ☐ 89
- ☐ 90
- ☐ 91
- ☐ 92
- ☐ 93
- ☐ 94
- ☐ 95
- ☐ 96
- ☐ 97
- ☐ 98
- ☐ 99
- ☐ Don't know



At what age were you first told you had cervical cancer?

- ☐ 0
- ☐ 1
- ☐ 2
- ☐ 3
- ☐ 4
- ☐ 5
- ☐ 6
- ☐ 7
- ☐ 8
- ☐ 9
- ☐ 10
- ☐ 11
- ☐ 12
- ☐ 13
- ☐ 14
- ☐ 15
- ☐ 16
- ☐ 17
- ☐ 18
- ☐ 19
- ☐ 20
- ☐ 21
- ☐ 22
- ☐ 23
- ☐ 24
- ☐ 25
- ☐ 26
- ☐ 27
- ☐ 28
- ☐ 29
- ☐ 30
- ☐ 31
- ☐ 32
- ☐ 33
- ☐ 34
- ☐ 35
- ☐ 36
- ☐ 37
- ☐ 38
- ☐ 39
- ☐ 40
- ☐ 41
- ☐ 42
- ☐ 43
- ☐ 44
- ☐ 45
- ☐ 46
- ☐ 47
- ☐ 48
- ☐ 49
- ☐ 50
- ☐ 51
- ☐ 52
- ☐ 53
- ☐ 54
- ☐ 55
- ☐ 56
- ☐ 57
- ☐ 58
- ☐ 59
- ☐ 60
- ☐ 61
- ☐ 62
- ☐ 63
- ☐ 64
- ☐ 65
- ☐ 66
- ☐ 67
- ☐ 68

- ☐ 69
- ☐ 70
- ☐ 71
- ☐ 72
- ☐ 73
- ☐ 74
- ☐ 75
- ☐ 76
- ☐ 77
- ☐ 78
- ☐ 79
- ☐ 80
- ☐ 81
- ☐ 82
- ☐ 83
- ☐ 84
- ☐ 85
- ☐ 86
- ☐ 87
- ☐ 88
- ☐ 89
- ☐ 90
- ☐ 91
- ☐ 92
- ☐ 93
- ☐ 94
- ☐ 95
- ☐ 96
- ☐ 97
- ☐ 98
- ☐ 99
- ☐ Don't know

At what age were you first told you had cancer of  
other female reproductive organs (include uterus,  
ovary) ?

- ☐ 0
- ☐ 1
- ☐ 2
- ☐ 3
- ☐ 4
- ☐ 5
- ☐ 6
- ☐ 7
- ☐ 8
- ☐ 9
- ☐ 10
- ☐ 11
- ☐ 12
- ☐ 13
- ☐ 14
- ☐ 15
- ☐ 16
- ☐ 17
- ☐ 18
- ☐ 19
- ☐ 20
- ☐ 21
- ☐ 22
- ☐ 23
- ☐ 24
- ☐ 25
- ☐ 26
- ☐ 27
- ☐ 28
- ☐ 29
- ☐ 30
- ☐ 31
- ☐ 32
- ☐ 33
- ☐ 34
- ☐ 35
- ☐ 36
- ☐ 37
- ☐ 38
- ☐ 39
- ☐ 40
- ☐ 41
- ☐ 42
- ☐ 43
- ☐ 44
- ☐ 45
- ☐ 46
- ☐ 47
- ☐ 48
- ☐ 49
- ☐ 50
- ☐ 51
- ☐ 52
- ☐ 53
- ☐ 54
- ☐ 55
- ☐ 56
- ☐ 57
- ☐ 58
- ☐ 59
- ☐ 60
- ☐ 61
- ☐ 62
- ☐ 63
- ☐ 64
- ☐ 65
- ☐ 66
- ☐ 67
- ☐ 68

- ☐ 69
- ☐ 70
- ☐ 71
- ☐ 72
- ☐ 73
- ☐ 74
- ☐ 75
- ☐ 76
- ☐ 77
- ☐ 78
- ☐ 79
- ☐ 80
- ☐ 81
- ☐ 82
- ☐ 83
- ☐ 84
- ☐ 85
- ☐ 86
- ☐ 87
- ☐ 88
- ☐ 89
- ☐ 90
- ☐ 91
- ☐ 92
- ☐ 93
- ☐ 94
- ☐ 95
- ☐ 96
- ☐ 97
- ☐ 98
- ☐ 99
- ☐ Don't know

At what age were you first told you had bladder/kidney cancer?

- ☐ 0
- ☐ 1
- ☐ 2
- ☐ 3
- ☐ 4
- ☐ 5
- ☐ 6
- ☐ 7
- ☐ 8
- ☐ 9
- ☐ 10
- ☐ 11
- ☐ 12
- ☐ 13
- ☐ 14
- ☐ 15
- ☐ 16
- ☐ 17
- ☐ 18
- ☐ 19
- ☐ 20
- ☐ 21
- ☐ 22
- ☐ 23
- ☐ 24
- ☐ 25
- ☐ 26
- ☐ 27
- ☐ 28
- ☐ 29
- ☐ 30
- ☐ 31
- ☐ 32
- ☐ 33
- ☐ 34
- ☐ 35
- ☐ 36
- ☐ 37
- ☐ 38
- ☐ 39
- ☐ 40
- ☐ 41
- ☐ 42
- ☐ 43
- ☐ 44
- ☐ 45
- ☐ 46
- ☐ 47
- ☐ 48
- ☐ 49
- ☐ 50
- ☐ 51
- ☐ 52
- ☐ 53
- ☐ 54
- ☐ 55
- ☐ 56
- ☐ 57
- ☐ 58
- ☐ 59
- ☐ 60
- ☐ 61
- ☐ 62
- ☐ 63
- ☐ 64
- ☐ 65
- ☐ 66
- ☐ 67
- ☐ 68

- ☐ 69
- ☐ 70
- ☐ 71
- ☐ 72
- ☐ 73
- ☐ 74
- ☐ 75
- ☐ 76
- ☐ 77
- ☐ 78
- ☐ 79
- ☐ 80
- ☐ 81
- ☐ 82
- ☐ 83
- ☐ 84
- ☐ 85
- ☐ 86
- ☐ 87
- ☐ 88
- ☐ 89
- ☐ 90
- ☐ 91
- ☐ 92
- ☐ 93
- ☐ 94
- ☐ 95
- ☐ 96
- ☐ 97
- ☐ 98
- ☐ 99
- ☐ Don't know

At what age were you first told you had stomach cancer?

- ☐ 0
- ☐ 1
- ☐ 2
- ☐ 3
- ☐ 4
- ☐ 5
- ☐ 6
- ☐ 7
- ☐ 8
- ☐ 9
- ☐ 10
- ☐ 11
- ☐ 12
- ☐ 13
- ☐ 14
- ☐ 15
- ☐ 16
- ☐ 17
- ☐ 18
- ☐ 19
- ☐ 20
- ☐ 21
- ☐ 22
- ☐ 23
- ☐ 24
- ☐ 25
- ☐ 26
- ☐ 27
- ☐ 28
- ☐ 29
- ☐ 30
- ☐ 31
- ☐ 32
- ☐ 33
- ☐ 34
- ☐ 35
- ☐ 36
- ☐ 37
- ☐ 38
- ☐ 39
- ☐ 40
- ☐ 41
- ☐ 42
- ☐ 43
- ☐ 44
- ☐ 45
- ☐ 46
- ☐ 47
- ☐ 48
- ☐ 49
- ☐ 50
- ☐ 51
- ☐ 52
- ☐ 53
- ☐ 54
- ☐ 55
- ☐ 56
- ☐ 57
- ☐ 58
- ☐ 59
- ☐ 60
- ☐ 61
- ☐ 62
- ☐ 63
- ☐ 64
- ☐ 65
- ☐ 66
- ☐ 67
- ☐ 68

- ☐ 69
- ☐ 70
- ☐ 71
- ☐ 72
- ☐ 73
- ☐ 74
- ☐ 75
- ☐ 76
- ☐ 77
- ☐ 78
- ☐ 79
- ☐ 80
- ☐ 81
- ☐ 82
- ☐ 83
- ☐ 84
- ☐ 85
- ☐ 86
- ☐ 87
- ☐ 88
- ☐ 89
- ☐ 90
- ☐ 91
- ☐ 92
- ☐ 93
- ☐ 94
- ☐ 95
- ☐ 96
- ☐ 97
- ☐ 98
- ☐ 99
- ☐ Don't know



---

At what age were you first told you had leukaemia?

- ☐ 0
- ☐ 1
- ☐ 2
- ☐ 3
- ☐ 4
- ☐ 5
- ☐ 6
- ☐ 7
- ☐ 8
- ☐ 9
- ☐ 10
- ☐ 11
- ☐ 12
- ☐ 13
- ☐ 14
- ☐ 15
- ☐ 16
- ☐ 17
- ☐ 18
- ☐ 19
- ☐ 20
- ☐ 21
- ☐ 22
- ☐ 23
- ☐ 24
- ☐ 25
- ☐ 26
- ☐ 27
- ☐ 28
- ☐ 29
- ☐ 30
- ☐ 31
- ☐ 32
- ☐ 33
- ☐ 34
- ☐ 35
- ☐ 36
- ☐ 37
- ☐ 38
- ☐ 39
- ☐ 40
- ☐ 41
- ☐ 42
- ☐ 43
- ☐ 44
- ☐ 45
- ☐ 46
- ☐ 47
- ☐ 48
- ☐ 49
- ☐ 50
- ☐ 51
- ☐ 52
- ☐ 53
- ☐ 54
- ☐ 55
- ☐ 56
- ☐ 57
- ☐ 58
- ☐ 59
- ☐ 60
- ☐ 61
- ☐ 62
- ☐ 63
- ☐ 64
- ☐ 65
- ☐ 66
- ☐ 67
- ☐ 68

- ☐ 69
- ☐ 70
- ☐ 71
- ☐ 72
- ☐ 73
- ☐ 74
- ☐ 75
- ☐ 76
- ☐ 77
- ☐ 78
- ☐ 79
- ☐ 80
- ☐ 81
- ☐ 82
- ☐ 83
- ☐ 84
- ☐ 85
- ☐ 86
- ☐ 87
- ☐ 88
- ☐ 89
- ☐ 90
- ☐ 91
- ☐ 92
- ☐ 93
- ☐ 94
- ☐ 95
- ☐ 96
- ☐ 97
- ☐ 98
- ☐ 99
- ☐ Don't know

At what age were you first told you had non-Hodgkin  
lymphoma

- ☐ 0
- ☐ 1
- ☐ 2
- ☐ 3
- ☐ 4
- ☐ 5
- ☐ 6
- ☐ 7
- ☐ 8
- ☐ 9
- ☐ 10
- ☐ 11
- ☐ 12
- ☐ 13
- ☐ 14
- ☐ 15
- ☐ 16
- ☐ 17
- ☐ 18
- ☐ 19
- ☐ 20
- ☐ 21
- ☐ 22
- ☐ 23
- ☐ 24
- ☐ 25
- ☐ 26
- ☐ 27
- ☐ 28
- ☐ 29
- ☐ 30
- ☐ 31
- ☐ 32
- ☐ 33
- ☐ 34
- ☐ 35
- ☐ 36
- ☐ 37
- ☐ 38
- ☐ 39
- ☐ 40
- ☐ 41
- ☐ 42
- ☐ 43
- ☐ 44
- ☐ 45
- ☐ 46
- ☐ 47
- ☐ 48
- ☐ 49
- ☐ 50
- ☐ 51
- ☐ 52
- ☐ 53
- ☐ 54
- ☐ 55
- ☐ 56
- ☐ 57
- ☐ 58
- ☐ 59
- ☐ 60
- ☐ 61
- ☐ 62
- ☐ 63
- ☐ 64
- ☐ 65
- ☐ 66
- ☐ 67
- ☐ 68

- ☐ 69
- ☐ 70
- ☐ 71
- ☐ 72
- ☐ 73
- ☐ 74
- ☐ 75
- ☐ 76
- ☐ 77
- ☐ 78
- ☐ 79
- ☐ 80
- ☐ 81
- ☐ 82
- ☐ 83
- ☐ 84
- ☐ 85
- ☐ 86
- ☐ 87
- ☐ 88
- ☐ 89
- ☐ 90
- ☐ 91
- ☐ 92
- ☐ 93
- ☐ 94
- ☐ 95
- ☐ 96
- ☐ 97
- ☐ 98
- ☐ 99
- ☐ Don't know

At what age were you first told you had other type of lymphoma?

- ☐ 0
- ☐ 1
- ☐ 2
- ☐ 3
- ☐ 4
- ☐ 5
- ☐ 6
- ☐ 7
- ☐ 8
- ☐ 9
- ☐ 10
- ☐ 11
- ☐ 12
- ☐ 13
- ☐ 14
- ☐ 15
- ☐ 16
- ☐ 17
- ☐ 18
- ☐ 19
- ☐ 20
- ☐ 21
- ☐ 22
- ☐ 23
- ☐ 24
- ☐ 25
- ☐ 26
- ☐ 27
- ☐ 28
- ☐ 29
- ☐ 30
- ☐ 31
- ☐ 32
- ☐ 33
- ☐ 34
- ☐ 35
- ☐ 36
- ☐ 37
- ☐ 38
- ☐ 39
- ☐ 40
- ☐ 41
- ☐ 42
- ☐ 43
- ☐ 44
- ☐ 45
- ☐ 46
- ☐ 47
- ☐ 48
- ☐ 49
- ☐ 50
- ☐ 51
- ☐ 52
- ☐ 53
- ☐ 54
- ☐ 55
- ☐ 56
- ☐ 57
- ☐ 58
- ☐ 59
- ☐ 60
- ☐ 61
- ☐ 62
- ☐ 63
- ☐ 64
- ☐ 65
- ☐ 66
- ☐ 67
- ☐ 68

- ☐ 69
- ☐ 70
- ☐ 71
- ☐ 72
- ☐ 73
- ☐ 74
- ☐ 75
- ☐ 76
- ☐ 77
- ☐ 78
- ☐ 79
- ☐ 80
- ☐ 81
- ☐ 82
- ☐ 83
- ☐ 84
- ☐ 85
- ☐ 86
- ☐ 87
- ☐ 88
- ☐ 89
- ☐ 90
- ☐ 91
- ☐ 92
- ☐ 93
- ☐ 94
- ☐ 95
- ☐ 96
- ☐ 97
- ☐ 98
- ☐ 99
- ☐ Don't know

At what age were you first told you had cancer of  
unknown primary site?

- ☐ 0
- ☐ 1
- ☐ 2
- ☐ 3
- ☐ 4
- ☐ 5
- ☐ 6
- ☐ 7
- ☐ 8
- ☐ 9
- ☐ 10
- ☐ 11
- ☐ 12
- ☐ 13
- ☐ 14
- ☐ 15
- ☐ 16
- ☐ 17
- ☐ 18
- ☐ 19
- ☐ 20
- ☐ 21
- ☐ 22
- ☐ 23
- ☐ 24
- ☐ 25
- ☐ 26
- ☐ 27
- ☐ 28
- ☐ 29
- ☐ 30
- ☐ 31
- ☐ 32
- ☐ 33
- ☐ 34
- ☐ 35
- ☐ 36
- ☐ 37
- ☐ 38
- ☐ 39
- ☐ 40
- ☐ 41
- ☐ 42
- ☐ 43
- ☐ 44
- ☐ 45
- ☐ 46
- ☐ 47
- ☐ 48
- ☐ 49
- ☐ 50
- ☐ 51
- ☐ 52
- ☐ 53
- ☐ 54
- ☐ 55
- ☐ 56
- ☐ 57
- ☐ 58
- ☐ 59
- ☐ 60
- ☐ 61
- ☐ 62
- ☐ 63
- ☐ 64
- ☐ 65
- ☐ 66
- ☐ 67
- ☐ 68

- ☐ 69
- ☐ 70
- ☐ 71
- ☐ 72
- ☐ 73
- ☐ 74
- ☐ 75
- ☐ 76
- ☐ 77
- ☐ 78
- ☐ 79
- ☐ 80
- ☐ 81
- ☐ 82
- ☐ 83
- ☐ 84
- ☐ 85
- ☐ 86
- ☐ 87
- ☐ 88
- ☐ 89
- ☐ 90
- ☐ 91
- ☐ 92
- ☐ 93
- ☐ 94
- ☐ 95
- ☐ 96
- ☐ 97
- ☐ 98
- ☐ 99
- ☐ Don't know



At what age were you first told you had  
[cancer\_others]?

- ☐ 0
- ☐ 1
- ☐ 2
- ☐ 3
- ☐ 4
- ☐ 5
- ☐ 6
- ☐ 7
- ☐ 8
- ☐ 9
- ☐ 10
- ☐ 11
- ☐ 12
- ☐ 13
- ☐ 14
- ☐ 15
- ☐ 16
- ☐ 17
- ☐ 18
- ☐ 19
- ☐ 20
- ☐ 21
- ☐ 22
- ☐ 23
- ☐ 24
- ☐ 25
- ☐ 26
- ☐ 27
- ☐ 28
- ☐ 29
- ☐ 30
- ☐ 31
- ☐ 32
- ☐ 33
- ☐ 34
- ☐ 35
- ☐ 36
- ☐ 37
- ☐ 38
- ☐ 39
- ☐ 40
- ☐ 41
- ☐ 42
- ☐ 43
- ☐ 44
- ☐ 45
- ☐ 46
- ☐ 47
- ☐ 48
- ☐ 49
- ☐ 50
- ☐ 51
- ☐ 52
- ☐ 53
- ☐ 54
- ☐ 55
- ☐ 56
- ☐ 57
- ☐ 58
- ☐ 59
- ☐ 60
- ☐ 61
- ☐ 62
- ☐ 63
- ☐ 64
- ☐ 65
- ☐ 66
- ☐ 67
- ☐ 68

- ☐ 69
- ☐ 70
- ☐ 71
- ☐ 72
- ☐ 73
- ☐ 74
- ☐ 75
- ☐ 76
- ☐ 77
- ☐ 78
- ☐ 79
- ☐ 80
- ☐ 81
- ☐ 82
- ☐ 83
- ☐ 84
- ☐ 85
- ☐ 86
- ☐ 87
- ☐ 88
- ☐ 89
- ☐ 90
- ☐ 91
- ☐ 92
- ☐ 93
- ☐ 94
- ☐ 95
- ☐ 96
- ☐ 97
- ☐ 98
- ☐ 99
- ☐ Don't know

At what age were you first told you had this condition?

- ☐ 0
- ☐ 1
- ☐ 2
- ☐ 3
- ☐ 4
- ☐ 5
- ☐ 6
- ☐ 7
- ☐ 8
- ☐ 9
- ☐ 10
- ☐ 11
- ☐ 12
- ☐ 13
- ☐ 14
- ☐ 15
- ☐ 16
- ☐ 17
- ☐ 18
- ☐ 19
- ☐ 20
- ☐ 21
- ☐ 22
- ☐ 23
- ☐ 24
- ☐ 25
- ☐ 26
- ☐ 27
- ☐ 28
- ☐ 29
- ☐ 30
- ☐ 31
- ☐ 32
- ☐ 33
- ☐ 34
- ☐ 35
- ☐ 36
- ☐ 37
- ☐ 38
- ☐ 39
- ☐ 40
- ☐ 41
- ☐ 42
- ☐ 43
- ☐ 44
- ☐ 45
- ☐ 46
- ☐ 47
- ☐ 48
- ☐ 49
- ☐ 50
- ☐ 51
- ☐ 52
- ☐ 53
- ☐ 54
- ☐ 55
- ☐ 56
- ☐ 57
- ☐ 58
- ☐ 59
- ☐ 60
- ☐ 61
- ☐ 62
- ☐ 63
- ☐ 64
- ☐ 65
- ☐ 66
- ☐ 67
- ☐ 68

- ☐ 69
- ☐ 70
- ☐ 71
- ☐ 72
- ☐ 73
- ☐ 74
- ☐ 75
- ☐ 76
- ☐ 77
- ☐ 78
- ☐ 79
- ☐ 80
- ☐ 81
- ☐ 82
- ☐ 83
- ☐ 84
- ☐ 85
- ☐ 86
- ☐ 87
- ☐ 88
- ☐ 89
- ☐ 90
- ☐ 91
- ☐ 92
- ☐ 93
- ☐ 94
- ☐ 95
- ☐ 96
- ☐ 97
- ☐ 98
- ☐ 99
- ☐ Don't know

At what age were you first told you had  
[cancer\_others\_2]?

- ☐ 0
- ☐ 1
- ☐ 2
- ☐ 3
- ☐ 4
- ☐ 5
- ☐ 6
- ☐ 7
- ☐ 8
- ☐ 9
- ☐ 10
- ☐ 11
- ☐ 12
- ☐ 13
- ☐ 14
- ☐ 15
- ☐ 16
- ☐ 17
- ☐ 18
- ☐ 19
- ☐ 20
- ☐ 21
- ☐ 22
- ☐ 23
- ☐ 24
- ☐ 25
- ☐ 26
- ☐ 27
- ☐ 28
- ☐ 29
- ☐ 30
- ☐ 31
- ☐ 32
- ☐ 33
- ☐ 34
- ☐ 35
- ☐ 36
- ☐ 37
- ☐ 38
- ☐ 39
- ☐ 40
- ☐ 41
- ☐ 42
- ☐ 43
- ☐ 44
- ☐ 45
- ☐ 46
- ☐ 47
- ☐ 48
- ☐ 49
- ☐ 50
- ☐ 51
- ☐ 52
- ☐ 53
- ☐ 54
- ☐ 55
- ☐ 56
- ☐ 57
- ☐ 58
- ☐ 59
- ☐ 60
- ☐ 61
- ☐ 62
- ☐ 63
- ☐ 64
- ☐ 65
- ☐ 66
- ☐ 67
- ☐ 68

- ☐ 69
- ☐ 70
- ☐ 71
- ☐ 72
- ☐ 73
- ☐ 74
- ☐ 75
- ☐ 76
- ☐ 77
- ☐ 78
- ☐ 79
- ☐ 80
- ☐ 81
- ☐ 82
- ☐ 83
- ☐ 84
- ☐ 85
- ☐ 86
- ☐ 87
- ☐ 88
- ☐ 89
- ☐ 90
- ☐ 91
- ☐ 92
- ☐ 93
- ☐ 94
- ☐ 95
- ☐ 96
- ☐ 97
- ☐ 98
- ☐ 99
- ☐ Don't know

At what age were you first told you had  
[cancer\_others\_3]?

- ☐ 0
- ☐ 1
- ☐ 2
- ☐ 3
- ☐ 4
- ☐ 5
- ☐ 6
- ☐ 7
- ☐ 8
- ☐ 9
- ☐ 10
- ☐ 11
- ☐ 12
- ☐ 13
- ☐ 14
- ☐ 15
- ☐ 16
- ☐ 17
- ☐ 18
- ☐ 19
- ☐ 20
- ☐ 21
- ☐ 22
- ☐ 23
- ☐ 24
- ☐ 25
- ☐ 26
- ☐ 27
- ☐ 28
- ☐ 29
- ☐ 30
- ☐ 31
- ☐ 32
- ☐ 33
- ☐ 34
- ☐ 35
- ☐ 36
- ☐ 37
- ☐ 38
- ☐ 39
- ☐ 40
- ☐ 41
- ☐ 42
- ☐ 43
- ☐ 44
- ☐ 45
- ☐ 46
- ☐ 47
- ☐ 48
- ☐ 49
- ☐ 50
- ☐ 51
- ☐ 52
- ☐ 53
- ☐ 54
- ☐ 55
- ☐ 56
- ☐ 57
- ☐ 58
- ☐ 59
- ☐ 60
- ☐ 61
- ☐ 62
- ☐ 63
- ☐ 64
- ☐ 65
- ☐ 66
- ☐ 67
- ☐ 68

- ☐ 69
- ☐ 70
- ☐ 71
- ☐ 72
- ☐ 73
- ☐ 74
- ☐ 75
- ☐ 76
- ☐ 77
- ☐ 78
- ☐ 79
- ☐ 80
- ☐ 81
- ☐ 82
- ☐ 83
- ☐ 84
- ☐ 85
- ☐ 86
- ☐ 87
- ☐ 88
- ☐ 89
- ☐ 90
- ☐ 91
- ☐ 92
- ☐ 93
- ☐ 94
- ☐ 95
- ☐ 96
- ☐ 97
- ☐ 98
- ☐ 99
- ☐ Don't know

---

Do you still have Skin cancer (include melanoma, basal cell carcinoma, squamous cell carcinoma)?

- ☐ Yes
- ☐ No
- ☐ Don't know

---

Do you still have colon/rectum/bowel cancer (colorectal)?

- ☐ Yes
- ☐ No
- ☐ Don't know

---

Do you still have breast cancer?

- ☐ Yes
- ☐ No
- ☐ Don't know

---

Do you still have prostate cancer?

- ☐ Yes
- ☐ No
- ☐ Don't know

---

Do you still have lung cancer (include trachea, pleura and bronchus)?

- ☐ Yes
- ☐ No
- ☐ Don't know

---

Do you still have cervical cancer?

- ☐ Yes
- ☐ No
- ☐ Don't know

---

Do you still have cancer of other female reproductive organs (include uterus, ovary)?

- ☐ Yes
- ☐ No
- ☐ Don't know



---

Do you still have bladder/kidney cancer?

☐ Yes  
☐ No  
☐ Don't know

---

Do you still have stomach cancer?

☐ Yes  
☐ No  
☐ Don't know

---

Do you still have leukaemia?

☐ Yes  
☐ No  
☐ Don't know

---

Do you still have non- Hodgkin leukaemia?

☐ Yes  
☐ No  
☐ Don't know

---

Do you still have other type of lymphoma?

☐ Yes  
☐ No  
☐ Don't know

---

Do you still have cancer of unknown primary site?

☐ Yes  
☐ No  
☐ Don't know

---

Do you still have [cancer\_others]?

☐ Yes  
☐ No  
☐ Don't know

---

Do you still have this condition?

☐ Yes  
☐ No  
☐ Don't know

---

Do you still have [cancer\_others\_2]?

☐ Yes  
☐ No  
☐ Don't know

---

Do you still have [cancer\_others\_3]?

☐ Yes  
☐ No  
☐ Don't know

---

How was/is skin cancer (include melanoma, basal cell carcinoma, squamous cell carcinoma) treated?  
(Tick all that apply)

- ☐ no treatment
  - ☐ diet
  - ☐ exercise
  - ☐ medication/chemotherapy
  - ☐ natural/herbal therapy (please specify)
  - ☐ radiotherapy
  - ☐ supplements (please specify)
  - ☐ surgery
  - ☐ weight management
  - ☐ other (please specify)
  - ☐ Don't know
- 

please specify the natural/herbal therapy

---

---

please specify the supplements

---

---

please specify the treatment

---

---

How was/is colon/rectum/bowel cancer (colorectal) treated?  
(Tick all that apply)

- ☐ no treatment
- ☐ diet
- ☐ exercise
- ☐ medication/chemotherapy
- ☐ natural/herbal therapy (please specify)
- ☐ radiotherapy
- ☐ supplements (please specify)
- ☐ surgery
- ☐ weight management
- ☐ other (please specify)
- ☐ Don't know

---

please specify the natural/herbal therapy

---

---

please specify the supplements

---

---

please specify the treatment

---

---

How was/is breast cancer treated?  
(Tick all that apply)

- ☐ no treatment
- ☐ diet
- ☐ exercise
- ☐ medication/chemotherapy
- ☐ natural/herbal therapy (please specify)
- ☐ radiotherapy
- ☐ supplements (please specify)
- ☐ surgery
- ☐ weight management
- ☐ other (please specify)
- ☐ Don't know

---

please specify the natural/herbal therapy

---

---

please specify the supplements

---

---

please specify the treatment

---

---

How was/is prostate cancer treated?  
(Tick all that apply)

- ☐ no treatment
- ☐ diet
- ☐ exercise
- ☐ medication/chemotherapy
- ☐ natural/herbal therapy (please specify)
- ☐ radiotherapy
- ☐ supplements (please specify)
- ☐ surgery
- ☐ weight management
- ☐ other (please specify)
- ☐ Don't know

---

please specify the natural/herbal therapy

---

---

please specify the supplements

---

---

please specify the treatment

---

---

How was/is lung cancer (include trachea, pleura and bronchus) treated?  
(Tick all that apply)

- ☐ no treatment
- ☐ diet
- ☐ exercise
- ☐ medication/chemotherapy
- ☐ natural/herbal therapy (please specify)
- ☐ radiotherapy
- ☐ supplements (please specify)
- ☐ surgery
- ☐ weight management
- ☐ other (please specify)
- ☐ Don't know

---

please specify the natural/herbal therapy

---

---

please specify the supplements

---

---

please specify the treatment

---

---

How was/is cervical cancer treated?  
(Tick all that apply)

- ☐ no treatment
- ☐ diet
- ☐ exercise
- ☐ medication/chemotherapy
- ☐ natural/herbal therapy (please specify)
- ☐ radiotherapy
- ☐ supplements (please specify)
- ☐ surgery
- ☐ weight management
- ☐ other (please specify)
- ☐ Don't know

---

please specify the natural/herbal therapy

---

---

please specify the supplements

---

---

please specify the treatment

---

---

How was/is cancer of other female reproductive organs (include uterus, ovary) treated?  
(Tick all that apply)

- ☐ no treatment
- ☐ diet
- ☐ exercise
- ☐ medication/chemotherapy
- ☐ natural/herbal therapy (please specify)
- ☐ radiotherapy
- ☐ supplements (please specify)
- ☐ surgery
- ☐ weight management
- ☐ other (please specify)
- ☐ Don't know

---

please specify the natural/herbal therapy

---

---

please specify the supplements

---

---

please specify the treatment

---

---

How was/is bladder/kidney cancer treated?

- ☐ no treatment
- ☐ diet
- ☐ exercise
- ☐ medication/chemotherapy
- ☐ natural/herbal therapy (please specify)
- ☐ radiotherapy
- ☐ supplements (please specify)
- ☐ surgery
- ☐ weight management
- ☐ other (please specify)
- ☐ Don't know

---

please specify the natural/herbal therapy

---

---

please specify the supplements

---

---

please specify the treatment

---

---

How was/is stomach cancer treated?  
(Tick all that apply)

- ☐ no treatment
- ☐ diet
- ☐ exercise
- ☐ medication/chemotherapy
- ☐ natural/herbal therapy (please specify)
- ☐ radiotherapy
- ☐ supplements (please specify)
- ☐ surgery
- ☐ weight management
- ☐ other (please specify)
- ☐ Don't know

---

please specify the natural/herbal therapy

---

---

please specify the supplements

---

---

please specify the treatment

---

---

How was/is leukaemia treated?  
(Tick all that apply)

- ☐ no treatment
- ☐ diet
- ☐ exercise
- ☐ medication/chemotherapy
- ☐ natural/herbal therapy (please specify)
- ☐ radiotherapy
- ☐ supplements (please specify)
- ☐ surgery
- ☐ weight management
- ☐ other (please specify)
- ☐ Don't know

---

please specify the natural/herbal therapy

---

---

please specify the supplements

---

---

please specify the treatment

---

---

How was/is non-Hodgkin lymphoma treated?  
(Tick all that apply)

- ☐ no treatment
- ☐ diet
- ☐ exercise
- ☐ medication/chemotherapy
- ☐ natural/herbal therapy (please specify)
- ☐ radiotherapy
- ☐ supplements (please specify)
- ☐ surgery
- ☐ weight management
- ☐ other (please specify)
- ☐ Don't know

---

please specify the natural/herbal therapy

---

---

please specify the supplements

---

---

please specify the treatment

---

---

How was/is other type of lymphoma treated?  
(Tick all that apply)

- ☐ no treatment
- ☐ diet
- ☐ exercise
- ☐ medication/chemotherapy
- ☐ natural/herbal therapy (please specify)
- ☐ radiotherapy
- ☐ supplements (please specify)
- ☐ surgery
- ☐ weight management
- ☐ other (please specify)
- ☐ Don't know

---

please specify the natural/herbal therapy

---

---

please specify the supplements

---

---

please specify the treatment

---

---

How was/is cancer of unknown primary site treated?  
(Tick all that apply)

- ☐ no treatment
- ☐ diet
- ☐ exercise
- ☐ medication/chemotherapy
- ☐ natural/herbal therapy (please specify)
- ☐ radiotherapy
- ☐ supplements (please specify)
- ☐ surgery
- ☐ weight management
- ☐ other (please specify)
- ☐ Don't know

---

please specify the natural/herbal therapy

---

---

please specify the supplements

---

---

please specify the treatment

---

---

How was/is [cancer\_others] treated?  
(Tick all that apply)

- ☐ no treatment
- ☐ diet
- ☐ exercise
- ☐ medication/chemotherapy
- ☐ natural/herbal therapy (please specify)
- ☐ radiotherapy
- ☐ supplements (please specify)
- ☐ surgery
- ☐ weight management
- ☐ other (please specify)
- ☐ Don't know

---

please specify the natural/herbal therapy

---

---

please specify the supplements

---

---

please specify the treatment

---

---

How was/is this condition treated?  
(Tick all that apply)

- ☐ no treatment
- ☐ diet
- ☐ exercise
- ☐ medication/chemotherapy
- ☐ natural/herbal therapy (please specify)
- ☐ radiotherapy
- ☐ supplements (please specify)
- ☐ surgery
- ☐ weight management
- ☐ other (please specify)
- ☐ Don't know

---

please specify the natural/herbal therapy

---

---

please specify the supplements

---

---

please specify the treatment

---

---

please specify the treatment

---



---

How was/is [cancer\_others\_2] treated?  
(Tick all that apply)

- ☐ no treatment
- ☐ diet
- ☐ exercise
- ☐ medication/chemotherapy
- ☐ natural/herbal therapy (please specify)
- ☐ radiotherapy
- ☐ supplements (please specify)
- ☐ surgery
- ☐ weight management
- ☐ other (please specify)
- ☐ Don't know

---

please specify the natural/herbal therapy

---

---

please specify the supplements

---

---

please specify the treatment

---

---

How was/is [cancer\_others\_3] treated?  
(Tick all that apply)

- ☐ no treatment
- ☐ diet
- ☐ exercise
- ☐ medication/chemotherapy
- ☐ natural/herbal therapy (please specify)
- ☐ radiotherapy
- ☐ supplements (please specify)
- ☐ surgery
- ☐ weight management
- ☐ other (please specify)
- ☐ Don't know

---

please specify the natural/herbal therapy

---

---

please specify the supplements

---

---

please specify the treatment

---

---

Have either of your parents, or any of brothers or sisters ever been told by a doctor (GP or specialist) or nurse that they have any type of cancer?

- ☐ Yes
- ☐ No
- ☐ Don't know

---

This question is about your mental and emotional well-being. Have you ever been told by a doctor (GP or specialist) or psychologist that you have depression, an anxiety condition, or memory loss?

- ☐ Yes
- ☐ No
- ☐ Don't know
- ☐ Prefer not to say

---

Which condition/s have been confirmed by a doctor (GP or specialist) or psychologist?  
(Tick all that apply)

- ☐ Alzheimer's Disease
- ☐ Anxiety condition (such as post-traumatic stress disorder, panic attacks, obsessive compulsive disorder, phobias)
- ☐ Dementia
- ☐ Depression (including post-natal depression)
- ☐ Mild cognitive impairment (MCI)
- ☐ Other anxiety condition
- ☐ Other mood condition
- ☐ Other (please specify)
- ☐ Don't Know

---

please specify the condition

---

---

Do you have another mental health or emotional health condition that needs to be specified?

☐ Yes ☐ No

---

please specify the second condition

---

---

Do you have another mental health or emotional health condition that needs to be specified?

☐ Yes ☐ No

---

please specify the third condition

---

At what age were you first told you had Alzheimer's disease?

- ☐ 0
- ☐ 1
- ☐ 2
- ☐ 3
- ☐ 4
- ☐ 5
- ☐ 6
- ☐ 7
- ☐ 8
- ☐ 9
- ☐ 10
- ☐ 11
- ☐ 12
- ☐ 13
- ☐ 14
- ☐ 15
- ☐ 16
- ☐ 17
- ☐ 18
- ☐ 19
- ☐ 20
- ☐ 21
- ☐ 22
- ☐ 23
- ☐ 24
- ☐ 25
- ☐ 26
- ☐ 27
- ☐ 28
- ☐ 29
- ☐ 30
- ☐ 31
- ☐ 32
- ☐ 33
- ☐ 34
- ☐ 35
- ☐ 36
- ☐ 37
- ☐ 38
- ☐ 39
- ☐ 40
- ☐ 41
- ☐ 42
- ☐ 43
- ☐ 44
- ☐ 45
- ☐ 46
- ☐ 47
- ☐ 48
- ☐ 49
- ☐ 50
- ☐ 51
- ☐ 52
- ☐ 53
- ☐ 54
- ☐ 55
- ☐ 56
- ☐ 57
- ☐ 58
- ☐ 59
- ☐ 60
- ☐ 61
- ☐ 62
- ☐ 63
- ☐ 64
- ☐ 65
- ☐ 66
- ☐ 67
- ☐ 68

- ☐ 69
- ☐ 70
- ☐ 71
- ☐ 72
- ☐ 73
- ☐ 74
- ☐ 75
- ☐ 76
- ☐ 77
- ☐ 78
- ☐ 79
- ☐ 80
- ☐ 81
- ☐ 82
- ☐ 83
- ☐ 84
- ☐ 85
- ☐ 86
- ☐ 87
- ☐ 88
- ☐ 89
- ☐ 90
- ☐ 91
- ☐ 92
- ☐ 93
- ☐ 94
- ☐ 95
- ☐ 96
- ☐ 97
- ☐ 98
- ☐ 99
- ☐ Don't know

At what age were you first told you had anxiety  
(post-traumatic stress disorder, panic attacks,  
obsessive compulsive disorder, phobias)?

- ☐ 0
- ☐ 1
- ☐ 2
- ☐ 3
- ☐ 4
- ☐ 5
- ☐ 6
- ☐ 7
- ☐ 8
- ☐ 9
- ☐ 10
- ☐ 11
- ☐ 12
- ☐ 13
- ☐ 14
- ☐ 15
- ☐ 16
- ☐ 17
- ☐ 18
- ☐ 19
- ☐ 20
- ☐ 21
- ☐ 22
- ☐ 23
- ☐ 24
- ☐ 25
- ☐ 26
- ☐ 27
- ☐ 28
- ☐ 29
- ☐ 30
- ☐ 31
- ☐ 32
- ☐ 33
- ☐ 34
- ☐ 35
- ☐ 36
- ☐ 37
- ☐ 38
- ☐ 39
- ☐ 40
- ☐ 41
- ☐ 42
- ☐ 43
- ☐ 44
- ☐ 45
- ☐ 46
- ☐ 47
- ☐ 48
- ☐ 49
- ☐ 50
- ☐ 51
- ☐ 52
- ☐ 53
- ☐ 54
- ☐ 55
- ☐ 56
- ☐ 57
- ☐ 58
- ☐ 59
- ☐ 60
- ☐ 61
- ☐ 62
- ☐ 63
- ☐ 64
- ☐ 65
- ☐ 66
- ☐ 67
- ☐ 68

- ☐ 69
- ☐ 70
- ☐ 71
- ☐ 72
- ☐ 73
- ☐ 74
- ☐ 75
- ☐ 76
- ☐ 77
- ☐ 78
- ☐ 79
- ☐ 80
- ☐ 81
- ☐ 82
- ☐ 83
- ☐ 84
- ☐ 85
- ☐ 86
- ☐ 87
- ☐ 88
- ☐ 89
- ☐ 90
- ☐ 91
- ☐ 92
- ☐ 93
- ☐ 94
- ☐ 95
- ☐ 96
- ☐ 97
- ☐ 98
- ☐ 99
- ☐ Don't know

---

At what age were you first told you had dementia?

- ☐ 0
- ☐ 1
- ☐ 2
- ☐ 3
- ☐ 4
- ☐ 5
- ☐ 6
- ☐ 7
- ☐ 8
- ☐ 9
- ☐ 10
- ☐ 11
- ☐ 12
- ☐ 13
- ☐ 14
- ☐ 15
- ☐ 16
- ☐ 17
- ☐ 18
- ☐ 19
- ☐ 20
- ☐ 21
- ☐ 22
- ☐ 23
- ☐ 24
- ☐ 25
- ☐ 26
- ☐ 27
- ☐ 28
- ☐ 29
- ☐ 30
- ☐ 31
- ☐ 32
- ☐ 33
- ☐ 34
- ☐ 35
- ☐ 36
- ☐ 37
- ☐ 38
- ☐ 39
- ☐ 40
- ☐ 41
- ☐ 42
- ☐ 43
- ☐ 44
- ☐ 45
- ☐ 46
- ☐ 47
- ☐ 48
- ☐ 49
- ☐ 50
- ☐ 51
- ☐ 52
- ☐ 53
- ☐ 54
- ☐ 55
- ☐ 56
- ☐ 57
- ☐ 58
- ☐ 59
- ☐ 60
- ☐ 61
- ☐ 62
- ☐ 63
- ☐ 64
- ☐ 65
- ☐ 66
- ☐ 67
- ☐ 68

- ☐ 69
- ☐ 70
- ☐ 71
- ☐ 72
- ☐ 73
- ☐ 74
- ☐ 75
- ☐ 76
- ☐ 77
- ☐ 78
- ☐ 79
- ☐ 80
- ☐ 81
- ☐ 82
- ☐ 83
- ☐ 84
- ☐ 85
- ☐ 86
- ☐ 87
- ☐ 88
- ☐ 89
- ☐ 90
- ☐ 91
- ☐ 92
- ☐ 93
- ☐ 94
- ☐ 95
- ☐ 96
- ☐ 97
- ☐ 98
- ☐ 99
- ☐ Don't know



At what age were you first told you had depression  
(including post-natal depression)?

- ☐ 0
- ☐ 1
- ☐ 2
- ☐ 3
- ☐ 4
- ☐ 5
- ☐ 6
- ☐ 7
- ☐ 8
- ☐ 9
- ☐ 10
- ☐ 11
- ☐ 12
- ☐ 13
- ☐ 14
- ☐ 15
- ☐ 16
- ☐ 17
- ☐ 18
- ☐ 19
- ☐ 20
- ☐ 21
- ☐ 22
- ☐ 23
- ☐ 24
- ☐ 25
- ☐ 26
- ☐ 27
- ☐ 28
- ☐ 29
- ☐ 30
- ☐ 31
- ☐ 32
- ☐ 33
- ☐ 34
- ☐ 35
- ☐ 36
- ☐ 37
- ☐ 38
- ☐ 39
- ☐ 40
- ☐ 41
- ☐ 42
- ☐ 43
- ☐ 44
- ☐ 45
- ☐ 46
- ☐ 47
- ☐ 48
- ☐ 49
- ☐ 50
- ☐ 51
- ☐ 52
- ☐ 53
- ☐ 54
- ☐ 55
- ☐ 56
- ☐ 57
- ☐ 58
- ☐ 59
- ☐ 60
- ☐ 61
- ☐ 62
- ☐ 63
- ☐ 64
- ☐ 65
- ☐ 66
- ☐ 67
- ☐ 68

- ☐ 69
- ☐ 70
- ☐ 71
- ☐ 72
- ☐ 73
- ☐ 74
- ☐ 75
- ☐ 76
- ☐ 77
- ☐ 78
- ☐ 79
- ☐ 80
- ☐ 81
- ☐ 82
- ☐ 83
- ☐ 84
- ☐ 85
- ☐ 86
- ☐ 87
- ☐ 88
- ☐ 89
- ☐ 90
- ☐ 91
- ☐ 92
- ☐ 93
- ☐ 94
- ☐ 95
- ☐ 96
- ☐ 97
- ☐ 98
- ☐ 99
- ☐ Don't know

At what age were you first told you had Mild cognitive impairment (MCI)?

- ☐ 0
- ☐ 1
- ☐ 2
- ☐ 3
- ☐ 4
- ☐ 5
- ☐ 6
- ☐ 7
- ☐ 8
- ☐ 9
- ☐ 10
- ☐ 11
- ☐ 12
- ☐ 13
- ☐ 14
- ☐ 15
- ☐ 16
- ☐ 17
- ☐ 18
- ☐ 19
- ☐ 20
- ☐ 21
- ☐ 22
- ☐ 23
- ☐ 24
- ☐ 25
- ☐ 26
- ☐ 27
- ☐ 28
- ☐ 29
- ☐ 30
- ☐ 31
- ☐ 32
- ☐ 33
- ☐ 34
- ☐ 35
- ☐ 36
- ☐ 37
- ☐ 38
- ☐ 39
- ☐ 40
- ☐ 41
- ☐ 42
- ☐ 43
- ☐ 44
- ☐ 45
- ☐ 46
- ☐ 47
- ☐ 48
- ☐ 49
- ☐ 50
- ☐ 51
- ☐ 52
- ☐ 53
- ☐ 54
- ☐ 55
- ☐ 56
- ☐ 57
- ☐ 58
- ☐ 59
- ☐ 60
- ☐ 61
- ☐ 62
- ☐ 63
- ☐ 64
- ☐ 65
- ☐ 66
- ☐ 67
- ☐ 68

- ☐ 69
- ☐ 70
- ☐ 71
- ☐ 72
- ☐ 73
- ☐ 74
- ☐ 75
- ☐ 76
- ☐ 77
- ☐ 78
- ☐ 79
- ☐ 80
- ☐ 81
- ☐ 82
- ☐ 83
- ☐ 84
- ☐ 85
- ☐ 86
- ☐ 87
- ☐ 88
- ☐ 89
- ☐ 90
- ☐ 91
- ☐ 92
- ☐ 93
- ☐ 94
- ☐ 95
- ☐ 96
- ☐ 97
- ☐ 98
- ☐ 99
- ☐ Don't know

At what age were you first told you had the anxiety condition?

- ☐ 0
- ☐ 1
- ☐ 2
- ☐ 3
- ☐ 4
- ☐ 5
- ☐ 6
- ☐ 7
- ☐ 8
- ☐ 9
- ☐ 10
- ☐ 11
- ☐ 12
- ☐ 13
- ☐ 14
- ☐ 15
- ☐ 16
- ☐ 17
- ☐ 18
- ☐ 19
- ☐ 20
- ☐ 21
- ☐ 22
- ☐ 23
- ☐ 24
- ☐ 25
- ☐ 26
- ☐ 27
- ☐ 28
- ☐ 29
- ☐ 30
- ☐ 31
- ☐ 32
- ☐ 33
- ☐ 34
- ☐ 35
- ☐ 36
- ☐ 37
- ☐ 38
- ☐ 39
- ☐ 40
- ☐ 41
- ☐ 42
- ☐ 43
- ☐ 44
- ☐ 45
- ☐ 46
- ☐ 47
- ☐ 48
- ☐ 49
- ☐ 50
- ☐ 51
- ☐ 52
- ☐ 53
- ☐ 54
- ☐ 55
- ☐ 56
- ☐ 57
- ☐ 58
- ☐ 59
- ☐ 60
- ☐ 61
- ☐ 62
- ☐ 63
- ☐ 64
- ☐ 65
- ☐ 66
- ☐ 67
- ☐ 68

- ☐ 69
- ☐ 70
- ☐ 71
- ☐ 72
- ☐ 73
- ☐ 74
- ☐ 75
- ☐ 76
- ☐ 77
- ☐ 78
- ☐ 79
- ☐ 80
- ☐ 81
- ☐ 82
- ☐ 83
- ☐ 84
- ☐ 85
- ☐ 86
- ☐ 87
- ☐ 88
- ☐ 89
- ☐ 90
- ☐ 91
- ☐ 92
- ☐ 93
- ☐ 94
- ☐ 95
- ☐ 96
- ☐ 97
- ☐ 98
- ☐ 99
- ☐ Don't know

At what age were you first told you had the mood condition?

- ☐ 0
- ☐ 1
- ☐ 2
- ☐ 3
- ☐ 4
- ☐ 5
- ☐ 6
- ☐ 7
- ☐ 8
- ☐ 9
- ☐ 10
- ☐ 11
- ☐ 12
- ☐ 13
- ☐ 14
- ☐ 15
- ☐ 16
- ☐ 17
- ☐ 18
- ☐ 19
- ☐ 20
- ☐ 21
- ☐ 22
- ☐ 23
- ☐ 24
- ☐ 25
- ☐ 26
- ☐ 27
- ☐ 28
- ☐ 29
- ☐ 30
- ☐ 31
- ☐ 32
- ☐ 33
- ☐ 34
- ☐ 35
- ☐ 36
- ☐ 37
- ☐ 38
- ☐ 39
- ☐ 40
- ☐ 41
- ☐ 42
- ☐ 43
- ☐ 44
- ☐ 45
- ☐ 46
- ☐ 47
- ☐ 48
- ☐ 49
- ☐ 50
- ☐ 51
- ☐ 52
- ☐ 53
- ☐ 54
- ☐ 55
- ☐ 56
- ☐ 57
- ☐ 58
- ☐ 59
- ☐ 60
- ☐ 61
- ☐ 62
- ☐ 63
- ☐ 64
- ☐ 65
- ☐ 66
- ☐ 67
- ☐ 68

- ☐ 69
- ☐ 70
- ☐ 71
- ☐ 72
- ☐ 73
- ☐ 74
- ☐ 75
- ☐ 76
- ☐ 77
- ☐ 78
- ☐ 79
- ☐ 80
- ☐ 81
- ☐ 82
- ☐ 83
- ☐ 84
- ☐ 85
- ☐ 86
- ☐ 87
- ☐ 88
- ☐ 89
- ☐ 90
- ☐ 91
- ☐ 92
- ☐ 93
- ☐ 94
- ☐ 95
- ☐ 96
- ☐ 97
- ☐ 98
- ☐ 99
- ☐ Don't know



At what age were you first told you had  
[mental\_others]?

- ☐ 0
- ☐ 1
- ☐ 2
- ☐ 3
- ☐ 4
- ☐ 5
- ☐ 6
- ☐ 7
- ☐ 8
- ☐ 9
- ☐ 10
- ☐ 11
- ☐ 12
- ☐ 13
- ☐ 14
- ☐ 15
- ☐ 16
- ☐ 17
- ☐ 18
- ☐ 19
- ☐ 20
- ☐ 21
- ☐ 22
- ☐ 23
- ☐ 24
- ☐ 25
- ☐ 26
- ☐ 27
- ☐ 28
- ☐ 29
- ☐ 30
- ☐ 31
- ☐ 32
- ☐ 33
- ☐ 34
- ☐ 35
- ☐ 36
- ☐ 37
- ☐ 38
- ☐ 39
- ☐ 40
- ☐ 41
- ☐ 42
- ☐ 43
- ☐ 44
- ☐ 45
- ☐ 46
- ☐ 47
- ☐ 48
- ☐ 49
- ☐ 50
- ☐ 51
- ☐ 52
- ☐ 53
- ☐ 54
- ☐ 55
- ☐ 56
- ☐ 57
- ☐ 58
- ☐ 59
- ☐ 60
- ☐ 61
- ☐ 62
- ☐ 63
- ☐ 64
- ☐ 65
- ☐ 66
- ☐ 67
- ☐ 68

- ☐ 69
- ☐ 70
- ☐ 71
- ☐ 72
- ☐ 73
- ☐ 74
- ☐ 75
- ☐ 76
- ☐ 77
- ☐ 78
- ☐ 79
- ☐ 80
- ☐ 81
- ☐ 82
- ☐ 83
- ☐ 84
- ☐ 85
- ☐ 86
- ☐ 87
- ☐ 88
- ☐ 89
- ☐ 90
- ☐ 91
- ☐ 92
- ☐ 93
- ☐ 94
- ☐ 95
- ☐ 96
- ☐ 97
- ☐ 98
- ☐ 99
- ☐ Don't know

---

At what age were you first told you [mental\_others\_2]?

- ☐ 0
- ☐ 1
- ☐ 2
- ☐ 3
- ☐ 4
- ☐ 5
- ☐ 6
- ☐ 7
- ☐ 8
- ☐ 9
- ☐ 10
- ☐ 11
- ☐ 12
- ☐ 13
- ☐ 14
- ☐ 15
- ☐ 16
- ☐ 17
- ☐ 18
- ☐ 19
- ☐ 20
- ☐ 21
- ☐ 22
- ☐ 23
- ☐ 24
- ☐ 25
- ☐ 26
- ☐ 27
- ☐ 28
- ☐ 29
- ☐ 30
- ☐ 31
- ☐ 32
- ☐ 33
- ☐ 34
- ☐ 35
- ☐ 36
- ☐ 37
- ☐ 38
- ☐ 39
- ☐ 40
- ☐ 41
- ☐ 42
- ☐ 43
- ☐ 44
- ☐ 45
- ☐ 46
- ☐ 47
- ☐ 48
- ☐ 49
- ☐ 50
- ☐ 51
- ☐ 52
- ☐ 53
- ☐ 54
- ☐ 55
- ☐ 56
- ☐ 57
- ☐ 58
- ☐ 59
- ☐ 60
- ☐ 61
- ☐ 62
- ☐ 63
- ☐ 64
- ☐ 65
- ☐ 66
- ☐ 67
- ☐ 68

- ☐ 69
- ☐ 70
- ☐ 71
- ☐ 72
- ☐ 73
- ☐ 74
- ☐ 75
- ☐ 76
- ☐ 77
- ☐ 78
- ☐ 79
- ☐ 80
- ☐ 81
- ☐ 82
- ☐ 83
- ☐ 84
- ☐ 85
- ☐ 86
- ☐ 87
- ☐ 88
- ☐ 89
- ☐ 90
- ☐ 91
- ☐ 92
- ☐ 93
- ☐ 94
- ☐ 95
- ☐ 96
- ☐ 97
- ☐ 98
- ☐ 99
- ☐ Don't know

---

At what age were you first told you [mental\_others\_3]?

- ☐ 0
- ☐ 1
- ☐ 2
- ☐ 3
- ☐ 4
- ☐ 5
- ☐ 6
- ☐ 7
- ☐ 8
- ☐ 9
- ☐ 10
- ☐ 11
- ☐ 12
- ☐ 13
- ☐ 14
- ☐ 15
- ☐ 16
- ☐ 17
- ☐ 18
- ☐ 19
- ☐ 20
- ☐ 21
- ☐ 22
- ☐ 23
- ☐ 24
- ☐ 25
- ☐ 26
- ☐ 27
- ☐ 28
- ☐ 29
- ☐ 30
- ☐ 31
- ☐ 32
- ☐ 33
- ☐ 34
- ☐ 35
- ☐ 36
- ☐ 37
- ☐ 38
- ☐ 39
- ☐ 40
- ☐ 41
- ☐ 42
- ☐ 43
- ☐ 44
- ☐ 45
- ☐ 46
- ☐ 47
- ☐ 48
- ☐ 49
- ☐ 50
- ☐ 51
- ☐ 52
- ☐ 53
- ☐ 54
- ☐ 55
- ☐ 56
- ☐ 57
- ☐ 58
- ☐ 59
- ☐ 60
- ☐ 61
- ☐ 62
- ☐ 63
- ☐ 64
- ☐ 65
- ☐ 66
- ☐ 67
- ☐ 68

- ☐ 69
- ☐ 70
- ☐ 71
- ☐ 72
- ☐ 73
- ☐ 74
- ☐ 75
- ☐ 76
- ☐ 77
- ☐ 78
- ☐ 79
- ☐ 80
- ☐ 81
- ☐ 82
- ☐ 83
- ☐ 84
- ☐ 85
- ☐ 86
- ☐ 87
- ☐ 88
- ☐ 89
- ☐ 90
- ☐ 91
- ☐ 92
- ☐ 93
- ☐ 94
- ☐ 95
- ☐ 96
- ☐ 97
- ☐ 98
- ☐ 99
- ☐ Don't know

At what age were you first told you had this condition?

- ☐ 0
- ☐ 1
- ☐ 2
- ☐ 3
- ☐ 4
- ☐ 5
- ☐ 6
- ☐ 7
- ☐ 8
- ☐ 9
- ☐ 10
- ☐ 11
- ☐ 12
- ☐ 13
- ☐ 14
- ☐ 15
- ☐ 16
- ☐ 17
- ☐ 18
- ☐ 19
- ☐ 20
- ☐ 21
- ☐ 22
- ☐ 23
- ☐ 24
- ☐ 25
- ☐ 26
- ☐ 27
- ☐ 28
- ☐ 29
- ☐ 30
- ☐ 31
- ☐ 32
- ☐ 33
- ☐ 34
- ☐ 35
- ☐ 36
- ☐ 37
- ☐ 38
- ☐ 39
- ☐ 40
- ☐ 41
- ☐ 42
- ☐ 43
- ☐ 44
- ☐ 45
- ☐ 46
- ☐ 47
- ☐ 48
- ☐ 49
- ☐ 50
- ☐ 51
- ☐ 52
- ☐ 53
- ☐ 54
- ☐ 55
- ☐ 56
- ☐ 57
- ☐ 58
- ☐ 59
- ☐ 60
- ☐ 61
- ☐ 62
- ☐ 63
- ☐ 64
- ☐ 65
- ☐ 66
- ☐ 67
- ☐ 68

- ☐ 69
- ☐ 70
- ☐ 71
- ☐ 72
- ☐ 73
- ☐ 74
- ☐ 75
- ☐ 76
- ☐ 77
- ☐ 78
- ☐ 79
- ☐ 80
- ☐ 81
- ☐ 82
- ☐ 83
- ☐ 84
- ☐ 85
- ☐ 86
- ☐ 87
- ☐ 88
- ☐ 89
- ☐ 90
- ☐ 91
- ☐ 92
- ☐ 93
- ☐ 94
- ☐ 95
- ☐ 96
- ☐ 97
- ☐ 98
- ☐ 99
- ☐ Don't know

---

Do you still have depression (including post-natal depression)?

- ☐ Yes
- ☐ No
- ☐ Don't know

---

Do you still have this mood condition?

- ☐ Yes
- ☐ No
- ☐ Don't know

---

Do you still have anxiety (post-traumatic stress disorder, panic attacks, obsessive compulsive disorder, phobias)?

- ☐ Yes
- ☐ No
- ☐ Don't know

---

Do you still have this anxiety condition?

- ☐ Yes
- ☐ No
- ☐ Don't know

---

Do you still have Mild cognitive impairment (MCI)?

- ☐ Yes
- ☐ No
- ☐ Don't know

---

Do you still have dementia?

- ☐ Yes
- ☐ No
- ☐ Don't know

---

Do you still have Alzheimer's disease?

- ☐ Yes
- ☐ No
- ☐ Don't know



---

Do you still have [mental\_others]?

- ☐ Yes  
☐ No  
☐ Don't know
- 

Do you still have this condition?

- ☐ Yes  
☐ No  
☐ Don't know
- 

Do you still have [mental\_others\_2]?

- ☐ Yes  
☐ No  
☐ Don't know
- 

Do you still have [mental\_others\_3]?

- ☐ Yes  
☐ No  
☐ Don't know
- 

How is depression (including post-natal depression) treated?  
(Tick all that apply)

- ☐ no treatment   ☐ diet   ☐ exercise   ☐ medication (please specify)   ☐ natural/herbal therapy (please specify)  
☐ weight management   ☐ supplements (please specify)   ☐ other (please specify)  
☐ Don't know
- 

please specify the medication

---

please specify the natural/herbal therapy

---

please specify the supplements

---

please specify the treatment

---

---

How is this mood condition treated?  
(Tick all that apply)

- ☐ no treatment   ☐ diet   ☐ exercise   ☐ medication (please specify)   ☐ natural/herbal therapy (please specify)  
☐ weight management   ☐ supplements (please specify)   ☐ other (please specify)  
☐ Don't know
- 

please specify the medication

---

please specify the natural/herbal therapy

---

please specify the supplements

---

please specify the treatment

---

---

How is anxiety condition (such as post-traumatic stress disorder, panic attacks, obsessive compulsive disorder, phobias) treated?

(Tick all that apply)

- ☐ no treatment   ☐ diet   ☐ exercise   ☐ medication (please specify)   ☐ natural/herbal therapy (please specify)   ☐ weight management   ☐ supplements (please specify)   ☐ other (please specify)  
☐ Don't know

---

please specify the medication

---

---

please specify the natural/herbal therapy

---

---

please specify the supplements

---

---

please specify the treatment

---

---

How is this anxiety condition treated?

(Tick all that apply)

- ☐ no treatment   ☐ diet   ☐ exercise   ☐ medication (please specify)   ☐ natural/herbal therapy (please specify)   ☐ weight management   ☐ supplements (please specify)   ☐ other (please specify)  
☐ Don't know

---

please specify the medication

---

---

please specify the natural/herbal therapy

---

---

please specify the supplements

---

---

please specify the treatment

---

---

How is mild cognitive impairment (MCI) treated?

(Tick all that apply)

- ☐ no treatment   ☐ diet   ☐ exercise   ☐ medication (please specify)   ☐ natural/herbal therapy (please specify)   ☐ weight management   ☐ supplements (please specify)   ☐ other (please specify)  
☐ Don't know

---

please specify the medication

---

---

please specify the natural/herbal therapy

---

---

please specify the supplements

---

---

please specify the treatment

---

---

How is dimentia treated?

(Tick all that apply)

- ☐ no treatment   ☐ diet   ☐ exercise   ☐ medication (please specify)   ☐ natural/herbal therapy (please specify)   ☐ weight management   ☐ supplements (please specify)   ☐ other (please specify)  
☐ Don't know

---

please specify the medication

---

---

please specify the natural/herbal therapy

---

---

please specify the supplements

---

---

please specify the treatment

---

---

How is Alzhiemer's Disease treated?

(Tick all that apply)

- ☐ no treatment   ☐ diet   ☐ exercise   ☐ medication (please specify)   ☐ natural/herbal therapy (please specify)   ☐ weight management   ☐ supplements (please specify)   ☐ other (please specify)  
☐ Don't know

---

please specify the medication

---

---

please specify the natural/herbal therapy

---

---

please specify the supplements

---

---

please specify the treatment

---

---

How is [mental\_others] treated?

(Tick all that apply)

- ☐ no treatment   ☐ diet   ☐ exercise   ☐ medication (please specify)   ☐ natural/herbal therapy (please specify)   ☐ weight management   ☐ supplements (please specify)   ☐ other (please specify)  
☐ Don't know

---

please specify the medication

---

---

please specify the natural/herbal therapy

---

---

please specify the supplements

---

---

please specify the treatment

---

---

How is [mental\_others\_2] treated?

(Tick all that apply)

- ☐ no treatment   ☐ diet   ☐ exercise   ☐ medication (please specify)   ☐ natural/herbal therapy (please specify)   ☐ weight management   ☐ supplements (please specify)   ☐ other (please specify)  
☐ Don't know

---

please specify the medication

---

---

please specify the natural/herbal therapy

---

---

please specify the supplements

---

---

please specify the treatment

---

---

How is [mental\_others\_2] treated?

(Tick all that apply)

- ☐ no treatment   ☐ diet   ☐ exercise   ☐ medication (please specify)   ☐ natural/herbal therapy (please specify)   ☐ weight management   ☐ supplements (please specify)   ☐ other (please specify)  
☐ Don't know

---

please specify the medication

---

---

please specify the natural/herbal therapy

---

---

please specify the supplements

---

---

please specify the treatment

---

---

How is this condition treated?

(Tick all that apply)

- ☐ no treatment   ☐ diet   ☐ exercise   ☐ medication (please specify)   ☐ natural/herbal therapy (please specify)   ☐ weight management   ☐ supplements (please specify)   ☐ other (please specify)  
☐ Don't know

---

please specify the medication

---

---

please specify the natural/herbal therapy

---

---

please specify the supplements

---

---

please specify the treatment

---

---

Have either of your parents, or any of brothers or sisters ever been told by a doctor (GP or specialist) or psychologist that they have any depression, an anxiety condition, or memory loss?

- ☐ Yes  
☐ No  
☐ Don't know

---

This question is about past or present eating disorders. Have you ever been told by a doctor (GP or specialist), dietitian, or psychologist that you have an eating disorder?

- ☐ Yes   ☐ No   ☐ Don't know  
☐ Prefer not to say

---

Which condition/s have been confirmed by a doctor (GP or specialist), dietitian, or psychologist?  
(Tick all that apply)

- ☐ Anorexia nervosa   ☐ Binge eating disorder   ☐ Bulimia nervosa   ☐ Other (please specify)  
☐ Don't Know

---

please specify the condition

---

---

Do you have another eating disorder condition need to be specified?

- ☐ Yes   ☐ No

---

please specify the second condition

---

---

Do you have another eating disorder condition need to be specified?

- ☐ Yes   ☐ No

---

please specify the third condition

---

At what age were you first told you had anorexia nervosa?

- ☐ 0
- ☐ 1
- ☐ 2
- ☐ 3
- ☐ 4
- ☐ 5
- ☐ 6
- ☐ 7
- ☐ 8
- ☐ 9
- ☐ 10
- ☐ 11
- ☐ 12
- ☐ 13
- ☐ 14
- ☐ 15
- ☐ 16
- ☐ 17
- ☐ 18
- ☐ 19
- ☐ 20
- ☐ 21
- ☐ 22
- ☐ 23
- ☐ 24
- ☐ 25
- ☐ 26
- ☐ 27
- ☐ 28
- ☐ 29
- ☐ 30
- ☐ 31
- ☐ 32
- ☐ 33
- ☐ 34
- ☐ 35
- ☐ 36
- ☐ 37
- ☐ 38
- ☐ 39
- ☐ 40
- ☐ 41
- ☐ 42
- ☐ 43
- ☐ 44
- ☐ 45
- ☐ 46
- ☐ 47
- ☐ 48
- ☐ 49
- ☐ 50
- ☐ 51
- ☐ 52
- ☐ 53
- ☐ 54
- ☐ 55
- ☐ 56
- ☐ 57
- ☐ 58
- ☐ 59
- ☐ 60
- ☐ 61
- ☐ 62
- ☐ 63
- ☐ 64
- ☐ 65
- ☐ 66
- ☐ 67
- ☐ 68

- ☐ 69
- ☐ 70
- ☐ 71
- ☐ 72
- ☐ 73
- ☐ 74
- ☐ 75
- ☐ 76
- ☐ 77
- ☐ 78
- ☐ 79
- ☐ 80
- ☐ 81
- ☐ 82
- ☐ 83
- ☐ 84
- ☐ 85
- ☐ 86
- ☐ 87
- ☐ 88
- ☐ 89
- ☐ 90
- ☐ 91
- ☐ 92
- ☐ 93
- ☐ 94
- ☐ 95
- ☐ 96
- ☐ 97
- ☐ 98
- ☐ 99
- ☐ Don't know

At what age were you first told you had binge eating disorder?

- ☐ 0
- ☐ 1
- ☐ 2
- ☐ 3
- ☐ 4
- ☐ 5
- ☐ 6
- ☐ 7
- ☐ 8
- ☐ 9
- ☐ 10
- ☐ 11
- ☐ 12
- ☐ 13
- ☐ 14
- ☐ 15
- ☐ 16
- ☐ 17
- ☐ 18
- ☐ 19
- ☐ 20
- ☐ 21
- ☐ 22
- ☐ 23
- ☐ 24
- ☐ 25
- ☐ 26
- ☐ 27
- ☐ 28
- ☐ 29
- ☐ 30
- ☐ 31
- ☐ 32
- ☐ 33
- ☐ 34
- ☐ 35
- ☐ 36
- ☐ 37
- ☐ 38
- ☐ 39
- ☐ 40
- ☐ 41
- ☐ 42
- ☐ 43
- ☐ 44
- ☐ 45
- ☐ 46
- ☐ 47
- ☐ 48
- ☐ 49
- ☐ 50
- ☐ 51
- ☐ 52
- ☐ 53
- ☐ 54
- ☐ 55
- ☐ 56
- ☐ 57
- ☐ 58
- ☐ 59
- ☐ 60
- ☐ 61
- ☐ 62
- ☐ 63
- ☐ 64
- ☐ 65
- ☐ 66
- ☐ 67
- ☐ 68



- ☐ 69
- ☐ 70
- ☐ 71
- ☐ 72
- ☐ 73
- ☐ 74
- ☐ 75
- ☐ 76
- ☐ 77
- ☐ 78
- ☐ 79
- ☐ 80
- ☐ 81
- ☐ 82
- ☐ 83
- ☐ 84
- ☐ 85
- ☐ 86
- ☐ 87
- ☐ 88
- ☐ 89
- ☐ 90
- ☐ 91
- ☐ 92
- ☐ 93
- ☐ 94
- ☐ 95
- ☐ 96
- ☐ 97
- ☐ 98
- ☐ 99
- ☐ Don't know

At what age were you first told you had bulimia  
nervosa?

- ☐ 0
- ☐ 1
- ☐ 2
- ☐ 3
- ☐ 4
- ☐ 5
- ☐ 6
- ☐ 7
- ☐ 8
- ☐ 9
- ☐ 10
- ☐ 11
- ☐ 12
- ☐ 13
- ☐ 14
- ☐ 15
- ☐ 16
- ☐ 17
- ☐ 18
- ☐ 19
- ☐ 20
- ☐ 21
- ☐ 22
- ☐ 23
- ☐ 24
- ☐ 25
- ☐ 26
- ☐ 27
- ☐ 28
- ☐ 29
- ☐ 30
- ☐ 31
- ☐ 32
- ☐ 33
- ☐ 34
- ☐ 35
- ☐ 36
- ☐ 37
- ☐ 38
- ☐ 39
- ☐ 40
- ☐ 41
- ☐ 42
- ☐ 43
- ☐ 44
- ☐ 45
- ☐ 46
- ☐ 47
- ☐ 48
- ☐ 49
- ☐ 50
- ☐ 51
- ☐ 52
- ☐ 53
- ☐ 54
- ☐ 55
- ☐ 56
- ☐ 57
- ☐ 58
- ☐ 59
- ☐ 60
- ☐ 61
- ☐ 62
- ☐ 63
- ☐ 64
- ☐ 65
- ☐ 66
- ☐ 67
- ☐ 68

- ☐ 69
- ☐ 70
- ☐ 71
- ☐ 72
- ☐ 73
- ☐ 74
- ☐ 75
- ☐ 76
- ☐ 77
- ☐ 78
- ☐ 79
- ☐ 80
- ☐ 81
- ☐ 82
- ☐ 83
- ☐ 84
- ☐ 85
- ☐ 86
- ☐ 87
- ☐ 88
- ☐ 89
- ☐ 90
- ☐ 91
- ☐ 92
- ☐ 93
- ☐ 94
- ☐ 95
- ☐ 96
- ☐ 97
- ☐ 98
- ☐ 99
- ☐ Don't know

---

At what age were you first told you had [ed\_others]?

- ☐ 0
- ☐ 1
- ☐ 2
- ☐ 3
- ☐ 4
- ☐ 5
- ☐ 6
- ☐ 7
- ☐ 8
- ☐ 9
- ☐ 10
- ☐ 11
- ☐ 12
- ☐ 13
- ☐ 14
- ☐ 15
- ☐ 16
- ☐ 17
- ☐ 18
- ☐ 19
- ☐ 20
- ☐ 21
- ☐ 22
- ☐ 23
- ☐ 24
- ☐ 25
- ☐ 26
- ☐ 27
- ☐ 28
- ☐ 29
- ☐ 30
- ☐ 31
- ☐ 32
- ☐ 33
- ☐ 34
- ☐ 35
- ☐ 36
- ☐ 37
- ☐ 38
- ☐ 39
- ☐ 40
- ☐ 41
- ☐ 42
- ☐ 43
- ☐ 44
- ☐ 45
- ☐ 46
- ☐ 47
- ☐ 48
- ☐ 49
- ☐ 50
- ☐ 51
- ☐ 52
- ☐ 53
- ☐ 54
- ☐ 55
- ☐ 56
- ☐ 57
- ☐ 58
- ☐ 59
- ☐ 60
- ☐ 61
- ☐ 62
- ☐ 63
- ☐ 64
- ☐ 65
- ☐ 66
- ☐ 67
- ☐ 68

- ☐ 69
- ☐ 70
- ☐ 71
- ☐ 72
- ☐ 73
- ☐ 74
- ☐ 75
- ☐ 76
- ☐ 77
- ☐ 78
- ☐ 79
- ☐ 80
- ☐ 81
- ☐ 82
- ☐ 83
- ☐ 84
- ☐ 85
- ☐ 86
- ☐ 87
- ☐ 88
- ☐ 89
- ☐ 90
- ☐ 91
- ☐ 92
- ☐ 93
- ☐ 94
- ☐ 95
- ☐ 96
- ☐ 97
- ☐ 98
- ☐ 99
- ☐ Don't know

---

At what age were you first told you had [ed\_others\_2]?

- ☐ 0
- ☐ 1
- ☐ 2
- ☐ 3
- ☐ 4
- ☐ 5
- ☐ 6
- ☐ 7
- ☐ 8
- ☐ 9
- ☐ 10
- ☐ 11
- ☐ 12
- ☐ 13
- ☐ 14
- ☐ 15
- ☐ 16
- ☐ 17
- ☐ 18
- ☐ 19
- ☐ 20
- ☐ 21
- ☐ 22
- ☐ 23
- ☐ 24
- ☐ 25
- ☐ 26
- ☐ 27
- ☐ 28
- ☐ 29
- ☐ 30
- ☐ 31
- ☐ 32
- ☐ 33
- ☐ 34
- ☐ 35
- ☐ 36
- ☐ 37
- ☐ 38
- ☐ 39
- ☐ 40
- ☐ 41
- ☐ 42
- ☐ 43
- ☐ 44
- ☐ 45
- ☐ 46
- ☐ 47
- ☐ 48
- ☐ 49
- ☐ 50
- ☐ 51
- ☐ 52
- ☐ 53
- ☐ 54
- ☐ 55
- ☐ 56
- ☐ 57
- ☐ 58
- ☐ 59
- ☐ 60
- ☐ 61
- ☐ 62
- ☐ 63
- ☐ 64
- ☐ 65
- ☐ 66
- ☐ 67
- ☐ 68

- ☐ 69
- ☐ 70
- ☐ 71
- ☐ 72
- ☐ 73
- ☐ 74
- ☐ 75
- ☐ 76
- ☐ 77
- ☐ 78
- ☐ 79
- ☐ 80
- ☐ 81
- ☐ 82
- ☐ 83
- ☐ 84
- ☐ 85
- ☐ 86
- ☐ 87
- ☐ 88
- ☐ 89
- ☐ 90
- ☐ 91
- ☐ 92
- ☐ 93
- ☐ 94
- ☐ 95
- ☐ 96
- ☐ 97
- ☐ 98
- ☐ 99
- ☐ Don't know

---

At what age were you first told you had [ed\_others\_3]?

- ☐ 0
- ☐ 1
- ☐ 2
- ☐ 3
- ☐ 4
- ☐ 5
- ☐ 6
- ☐ 7
- ☐ 8
- ☐ 9
- ☐ 10
- ☐ 11
- ☐ 12
- ☐ 13
- ☐ 14
- ☐ 15
- ☐ 16
- ☐ 17
- ☐ 18
- ☐ 19
- ☐ 20
- ☐ 21
- ☐ 22
- ☐ 23
- ☐ 24
- ☐ 25
- ☐ 26
- ☐ 27
- ☐ 28
- ☐ 29
- ☐ 30
- ☐ 31
- ☐ 32
- ☐ 33
- ☐ 34
- ☐ 35
- ☐ 36
- ☐ 37
- ☐ 38
- ☐ 39
- ☐ 40
- ☐ 41
- ☐ 42
- ☐ 43
- ☐ 44
- ☐ 45
- ☐ 46
- ☐ 47
- ☐ 48
- ☐ 49
- ☐ 50
- ☐ 51
- ☐ 52
- ☐ 53
- ☐ 54
- ☐ 55
- ☐ 56
- ☐ 57
- ☐ 58
- ☐ 59
- ☐ 60
- ☐ 61
- ☐ 62
- ☐ 63
- ☐ 64
- ☐ 65
- ☐ 66
- ☐ 67
- ☐ 68



- ☐ 69
- ☐ 70
- ☐ 71
- ☐ 72
- ☐ 73
- ☐ 74
- ☐ 75
- ☐ 76
- ☐ 77
- ☐ 78
- ☐ 79
- ☐ 80
- ☐ 81
- ☐ 82
- ☐ 83
- ☐ 84
- ☐ 85
- ☐ 86
- ☐ 87
- ☐ 88
- ☐ 89
- ☐ 90
- ☐ 91
- ☐ 92
- ☐ 93
- ☐ 94
- ☐ 95
- ☐ 96
- ☐ 97
- ☐ 98
- ☐ 99
- ☐ Don't know

---

At what age were you first told you had the condition?

- ☐ 0
- ☐ 1
- ☐ 2
- ☐ 3
- ☐ 4
- ☐ 5
- ☐ 6
- ☐ 7
- ☐ 8
- ☐ 9
- ☐ 10
- ☐ 11
- ☐ 12
- ☐ 13
- ☐ 14
- ☐ 15
- ☐ 16
- ☐ 17
- ☐ 18
- ☐ 19
- ☐ 20
- ☐ 21
- ☐ 22
- ☐ 23
- ☐ 24
- ☐ 25
- ☐ 26
- ☐ 27
- ☐ 28
- ☐ 29
- ☐ 30
- ☐ 31
- ☐ 32
- ☐ 33
- ☐ 34
- ☐ 35
- ☐ 36
- ☐ 37
- ☐ 38
- ☐ 39
- ☐ 40
- ☐ 41
- ☐ 42
- ☐ 43
- ☐ 44
- ☐ 45
- ☐ 46
- ☐ 47
- ☐ 48
- ☐ 49
- ☐ 50
- ☐ 51
- ☐ 52
- ☐ 53
- ☐ 54
- ☐ 55
- ☐ 56
- ☐ 57
- ☐ 58
- ☐ 59
- ☐ 60
- ☐ 61
- ☐ 62
- ☐ 63
- ☐ 64
- ☐ 65
- ☐ 66
- ☐ 67
- ☐ 68

- ☐ 69
- ☐ 70
- ☐ 71
- ☐ 72
- ☐ 73
- ☐ 74
- ☐ 75
- ☐ 76
- ☐ 77
- ☐ 78
- ☐ 79
- ☐ 80
- ☐ 81
- ☐ 82
- ☐ 83
- ☐ 84
- ☐ 85
- ☐ 86
- ☐ 87
- ☐ 88
- ☐ 89
- ☐ 90
- ☐ 91
- ☐ 92
- ☐ 93
- ☐ 94
- ☐ 95
- ☐ 96
- ☐ 97
- ☐ 98
- ☐ 99
- ☐ Don't know

---

Do you still have anorexia nervosa?

- ☐ Yes
- ☐ No
- ☐ Don't know

---

Do you still have binge eating disorder?

- ☐ Yes
- ☐ No
- ☐ Don't know

---

Do you still have bulimia nervosa?

- ☐ Yes
- ☐ No
- ☐ Don't know

---

Do you still have [ed\_others]?

- ☐ Yes
- ☐ No
- ☐ Don't know

---

Do you still have [ed\_others\_2]?

- ☐ Yes
- ☐ No
- ☐ Don't know

---

Do you still have [ed\_others\_3]?

- ☐ Yes
- ☐ No
- ☐ Don't know

---

Do you still have the condition?

- ☐ Yes
- ☐ No
- ☐ Don't know

---

How is anorexia nervosa treated?  
(Tick all that apply)

- ☐ no treatment  
☐ medication (please specify)  
☐ natural/herbal therapy (please specify)  
☐ supplements (please specify)  
☐ specialist consultations (please specify)  
☐ other (please specify)  
☐ Don't Know

---

please specify the medication

---

---

please specify the natural/herbal therapy

---

---

please specify the supplements

---

---

please specify the specialist consultations

---

---

please specify the treatment

---

---

How is binge eating disorder treated?  
(Tick all that apply)

- ☐ no treatment  
☐ medication (please specify)  
☐ natural/herbal therapy (please specify)  
☐ supplements (please specify)  
☐ specialist consultations (please specify)  
☐ other (please specify)  
☐ Don't Know

---

please specify the medication

---

---

please specify the natural/herbal therapy

---

---

please specify the supplements

---

---

please specify the specialist consultations

---

---

please specify the treatment

---

---

How is bulimia nervosa treated?  
(Tick all that apply)

- ☐ no treatment  
☐ medication (please specify)  
☐ natural/herbal therapy (please specify)  
☐ supplements (please specify)  
☐ specialist consultations (please specify)  
☐ other (please specify)  
☐ Don't Know

---

please specify the medication

---

---

please specify the natural/herbal therapy

---

---

please specify the supplements

---

---

please specify the specialist consultations

---

---

please specify the treatment

---

---

How is [ed\_others] treated?  
(Tick all that apply)

- ☐ no treatment  
☐ medication (please specify)  
☐ natural/herbal therapy (please specify)  
☐ supplements (please specify)  
☐ specialist consultations (please specify)  
☐ other (please specify)  
☐ Don't Know

---

please specify the medication

---

---

please specify the natural/herbal therapy

---

---

please specify the supplements

---

---

please specify the specialist consultations

---

---

please specify the treatment

---

---

How is [ed\_others\_2] treated?  
(Tick all that apply)

- ☐ no treatment  
☐ medication (please specify)  
☐ natural/herbal therapy (please specify)  
☐ supplements (please specify)  
☐ specialist consultations (please specify)  
☐ other (please specify)  
☐ Don't Know

---

please specify the medication

---

---

please specify the natural/herbal therapy

---

---

please specify the supplements

---

---

please specify the specialist consultations

---

---

please specify the treatment

---

---

How is [ed\_others\_3] treated?  
(Tick all that apply)

- ☐ no treatment  
☐ medication (please specify)  
☐ natural/herbal therapy (please specify)  
☐ supplements (please specify)  
☐ specialist consultations (please specify)  
☐ other (please specify)  
☐ Don't Know

---

please specify the medication

---

---

please specify the natural/herbal therapy

---

---

please specify the supplements

---

---

please specify the specialist consultations

---

---

please specify the treatment

---

---

How is this condition treated?  
(Tick all that apply)

- ☐ no treatment  
☐ medication (please specify)  
☐ natural/herbal therapy (please specify)  
☐ supplements (please specify)  
☐ specialist consultations (please specify)  
☐ other (please specify)  
☐ Don't Know

---

please specify the medication

---

---

please specify the natural/herbal therapy

---

---

please specify the supplements

---

---

please specify the specialist consultations

---

---

please specify the treatment

---

---

Have you ever been told by a doctor (GP or specialist)  
or nurse that you have asthma?

- ☐ Yes  
☐ No  
☐ Don't know

---

At what age were you first told you had asthma?

- ☐ 0
- ☐ 1
- ☐ 2
- ☐ 3
- ☐ 4
- ☐ 5
- ☐ 6
- ☐ 7
- ☐ 8
- ☐ 9
- ☐ 10
- ☐ 11
- ☐ 12
- ☐ 13
- ☐ 14
- ☐ 15
- ☐ 16
- ☐ 17
- ☐ 18
- ☐ 19
- ☐ 20
- ☐ 21
- ☐ 22
- ☐ 23
- ☐ 24
- ☐ 25
- ☐ 26
- ☐ 27
- ☐ 28
- ☐ 29
- ☐ 30
- ☐ 31
- ☐ 32
- ☐ 33
- ☐ 34
- ☐ 35
- ☐ 36
- ☐ 37
- ☐ 38
- ☐ 39
- ☐ 40
- ☐ 41
- ☐ 42
- ☐ 43
- ☐ 44
- ☐ 45
- ☐ 46
- ☐ 47
- ☐ 48
- ☐ 49
- ☐ 50
- ☐ 51
- ☐ 52
- ☐ 53
- ☐ 54
- ☐ 55
- ☐ 56
- ☐ 57
- ☐ 58
- ☐ 59
- ☐ 60
- ☐ 61
- ☐ 62
- ☐ 63
- ☐ 64
- ☐ 65
- ☐ 66
- ☐ 67
- ☐ 68



- ☐ 69
- ☐ 70
- ☐ 71
- ☐ 72
- ☐ 73
- ☐ 74
- ☐ 75
- ☐ 76
- ☐ 77
- ☐ 78
- ☐ 79
- ☐ 80
- ☐ 81
- ☐ 82
- ☐ 83
- ☐ 84
- ☐ 85
- ☐ 86
- ☐ 87
- ☐ 88
- ☐ 89
- ☐ 90
- ☐ 91
- ☐ 92
- ☐ 93
- ☐ 94
- ☐ 95
- ☐ 96
- ☐ 97
- ☐ 98
- ☐ 99
- ☐ Don't know

---

Do you still get asthma?

- ☐ Yes
- ☐ No
- ☐ Don't know

---

How is your asthma treated?  
(Tick all that apply)

- ☐ no treatment   ☐ diet   ☐ exercise   ☐ medication (please specify)   ☐ natural/herbal therapy (please specify)   ☐ weight management   ☐ supplements (please specify)   ☐ other (please specify)
- ☐ Don't know

---

please specify the medication

\_\_\_\_\_

---

please specify the natural/herbal therapy

\_\_\_\_\_

---

please specify the supplements

\_\_\_\_\_

---

please specify the treatment

\_\_\_\_\_

---

Have either of your parents, or any of brothers or sisters ever been told by a doctor (GP or specialist), or nurse that they have asthma?

- ☐ Yes
- ☐ No
- ☐ Don't know

---

Do you currently have a food allergy or intolerance?

- ☐ Yes  
☐ No  
☐ Don't know

---

Which food allergy/allergies or intolerance/s have been confirmed by blood test, skin prick test, biopsy, or elimination diet prescribed by a dietitian?  
(Tick all that apply)

- ☐ None have been confirmed  
☐ amine intolerance  
☐ cow's milk/dairy allergy  
☐ cow's milk/dairy/lactose intolerance  
☐ coeliac disease (confirmed by biopsy)  
☐ colour/flavour/preservative (e.g. sulphite) intolerance  
☐ egg allergy  
☐ fish allergy  
☐ FODMAPS intolerance (e.g. fructans, fructose)  
☐ glutamate intolerance  
☐ gluten/wheat sensitivity (non-coeliac disease)  
☐ lupin allergy  
☐ peanut allergy  
☐ salicylate intolerance  
☐ shellfish allergy  
☐ soy allergy  
☐ tree nut allergy (e.g. cashew, hazelnut, walnut)  
☐ wheat allergy  
☐ yeast allergy  
☐ Other (please specify)  
☐ Don't Know

---

please specify the allergy or intolerance

---

---

Do you have another food allergy or intolerance need to be specified?

- ☐ Yes ☐ No

---

please specify the second allergy or intolerance

---

---

Do you have another food allergy or intolerance need to be specified?

- ☐ Yes ☐ No

---

please specify the third allergy or intolerance

---

---

At what age were you first told you had egg allergy?

- ☐ 0
- ☐ 1
- ☐ 2
- ☐ 3
- ☐ 4
- ☐ 5
- ☐ 6
- ☐ 7
- ☐ 8
- ☐ 9
- ☐ 10
- ☐ 11
- ☐ 12
- ☐ 13
- ☐ 14
- ☐ 15
- ☐ 16
- ☐ 17
- ☐ 18
- ☐ 19
- ☐ 20
- ☐ 21
- ☐ 22
- ☐ 23
- ☐ 24
- ☐ 25
- ☐ 26
- ☐ 27
- ☐ 28
- ☐ 29
- ☐ 30
- ☐ 31
- ☐ 32
- ☐ 33
- ☐ 34
- ☐ 35
- ☐ 36
- ☐ 37
- ☐ 38
- ☐ 39
- ☐ 40
- ☐ 41
- ☐ 42
- ☐ 43
- ☐ 44
- ☐ 45
- ☐ 46
- ☐ 47
- ☐ 48
- ☐ 49
- ☐ 50
- ☐ 51
- ☐ 52
- ☐ 53
- ☐ 54
- ☐ 55
- ☐ 56
- ☐ 57
- ☐ 58
- ☐ 59
- ☐ 60
- ☐ 61
- ☐ 62
- ☐ 63
- ☐ 64
- ☐ 65
- ☐ 66
- ☐ 67
- ☐ 68

- ☐ 69
- ☐ 70
- ☐ 71
- ☐ 72
- ☐ 73
- ☐ 74
- ☐ 75
- ☐ 76
- ☐ 77
- ☐ 78
- ☐ 79
- ☐ 80
- ☐ 81
- ☐ 82
- ☐ 83
- ☐ 84
- ☐ 85
- ☐ 86
- ☐ 87
- ☐ 88
- ☐ 89
- ☐ 90
- ☐ 91
- ☐ 92
- ☐ 93
- ☐ 94
- ☐ 95
- ☐ 96
- ☐ 97
- ☐ 98
- ☐ 99
- ☐ Don't know

At what age were you first told you had cow's milk/dairy allergy?

- ☐ 0
- ☐ 1
- ☐ 2
- ☐ 3
- ☐ 4
- ☐ 5
- ☐ 6
- ☐ 7
- ☐ 8
- ☐ 9
- ☐ 10
- ☐ 11
- ☐ 12
- ☐ 13
- ☐ 14
- ☐ 15
- ☐ 16
- ☐ 17
- ☐ 18
- ☐ 19
- ☐ 20
- ☐ 21
- ☐ 22
- ☐ 23
- ☐ 24
- ☐ 25
- ☐ 26
- ☐ 27
- ☐ 28
- ☐ 29
- ☐ 30
- ☐ 31
- ☐ 32
- ☐ 33
- ☐ 34
- ☐ 35
- ☐ 36
- ☐ 37
- ☐ 38
- ☐ 39
- ☐ 40
- ☐ 41
- ☐ 42
- ☐ 43
- ☐ 44
- ☐ 45
- ☐ 46
- ☐ 47
- ☐ 48
- ☐ 49
- ☐ 50
- ☐ 51
- ☐ 52
- ☐ 53
- ☐ 54
- ☐ 55
- ☐ 56
- ☐ 57
- ☐ 58
- ☐ 59
- ☐ 60
- ☐ 61
- ☐ 62
- ☐ 63
- ☐ 64
- ☐ 65
- ☐ 66
- ☐ 67
- ☐ 68

- ☐ 69
- ☐ 70
- ☐ 71
- ☐ 72
- ☐ 73
- ☐ 74
- ☐ 75
- ☐ 76
- ☐ 77
- ☐ 78
- ☐ 79
- ☐ 80
- ☐ 81
- ☐ 82
- ☐ 83
- ☐ 84
- ☐ 85
- ☐ 86
- ☐ 87
- ☐ 88
- ☐ 89
- ☐ 90
- ☐ 91
- ☐ 92
- ☐ 93
- ☐ 94
- ☐ 95
- ☐ 96
- ☐ 97
- ☐ 98
- ☐ 99
- ☐ Don't know

At what age were you first told you had cow's  
milk/dairy/lactose intolerance?

- ☐ 0
- ☐ 1
- ☐ 2
- ☐ 3
- ☐ 4
- ☐ 5
- ☐ 6
- ☐ 7
- ☐ 8
- ☐ 9
- ☐ 10
- ☐ 11
- ☐ 12
- ☐ 13
- ☐ 14
- ☐ 15
- ☐ 16
- ☐ 17
- ☐ 18
- ☐ 19
- ☐ 20
- ☐ 21
- ☐ 22
- ☐ 23
- ☐ 24
- ☐ 25
- ☐ 26
- ☐ 27
- ☐ 28
- ☐ 29
- ☐ 30
- ☐ 31
- ☐ 32
- ☐ 33
- ☐ 34
- ☐ 35
- ☐ 36
- ☐ 37
- ☐ 38
- ☐ 39
- ☐ 40
- ☐ 41
- ☐ 42
- ☐ 43
- ☐ 44
- ☐ 45
- ☐ 46
- ☐ 47
- ☐ 48
- ☐ 49
- ☐ 50
- ☐ 51
- ☐ 52
- ☐ 53
- ☐ 54
- ☐ 55
- ☐ 56
- ☐ 57
- ☐ 58
- ☐ 59
- ☐ 60
- ☐ 61
- ☐ 62
- ☐ 63
- ☐ 64
- ☐ 65
- ☐ 66
- ☐ 67
- ☐ 68

- ☐ 69
- ☐ 70
- ☐ 71
- ☐ 72
- ☐ 73
- ☐ 74
- ☐ 75
- ☐ 76
- ☐ 77
- ☐ 78
- ☐ 79
- ☐ 80
- ☐ 81
- ☐ 82
- ☐ 83
- ☐ 84
- ☐ 85
- ☐ 86
- ☐ 87
- ☐ 88
- ☐ 89
- ☐ 90
- ☐ 91
- ☐ 92
- ☐ 93
- ☐ 94
- ☐ 95
- ☐ 96
- ☐ 97
- ☐ 98
- ☐ 99
- ☐ Don't know



At what age were you first told you had peanut allergy?

- ☐ 0
- ☐ 1
- ☐ 2
- ☐ 3
- ☐ 4
- ☐ 5
- ☐ 6
- ☐ 7
- ☐ 8
- ☐ 9
- ☐ 10
- ☐ 11
- ☐ 12
- ☐ 13
- ☐ 14
- ☐ 15
- ☐ 16
- ☐ 17
- ☐ 18
- ☐ 19
- ☐ 20
- ☐ 21
- ☐ 22
- ☐ 23
- ☐ 24
- ☐ 25
- ☐ 26
- ☐ 27
- ☐ 28
- ☐ 29
- ☐ 30
- ☐ 31
- ☐ 32
- ☐ 33
- ☐ 34
- ☐ 35
- ☐ 36
- ☐ 37
- ☐ 38
- ☐ 39
- ☐ 40
- ☐ 41
- ☐ 42
- ☐ 43
- ☐ 44
- ☐ 45
- ☐ 46
- ☐ 47
- ☐ 48
- ☐ 49
- ☐ 50
- ☐ 51
- ☐ 52
- ☐ 53
- ☐ 54
- ☐ 55
- ☐ 56
- ☐ 57
- ☐ 58
- ☐ 59
- ☐ 60
- ☐ 61
- ☐ 62
- ☐ 63
- ☐ 64
- ☐ 65
- ☐ 66
- ☐ 67
- ☐ 68

- ☐ 69
- ☐ 70
- ☐ 71
- ☐ 72
- ☐ 73
- ☐ 74
- ☐ 75
- ☐ 76
- ☐ 77
- ☐ 78
- ☐ 79
- ☐ 80
- ☐ 81
- ☐ 82
- ☐ 83
- ☐ 84
- ☐ 85
- ☐ 86
- ☐ 87
- ☐ 88
- ☐ 89
- ☐ 90
- ☐ 91
- ☐ 92
- ☐ 93
- ☐ 94
- ☐ 95
- ☐ 96
- ☐ 97
- ☐ 98
- ☐ 99
- ☐ Don't know

At what age were you first told you had tree nut allergy (e.g. cashew, hazelnut, walnut)?

- ☐ 0
- ☐ 1
- ☐ 2
- ☐ 3
- ☐ 4
- ☐ 5
- ☐ 6
- ☐ 7
- ☐ 8
- ☐ 9
- ☐ 10
- ☐ 11
- ☐ 12
- ☐ 13
- ☐ 14
- ☐ 15
- ☐ 16
- ☐ 17
- ☐ 18
- ☐ 19
- ☐ 20
- ☐ 21
- ☐ 22
- ☐ 23
- ☐ 24
- ☐ 25
- ☐ 26
- ☐ 27
- ☐ 28
- ☐ 29
- ☐ 30
- ☐ 31
- ☐ 32
- ☐ 33
- ☐ 34
- ☐ 35
- ☐ 36
- ☐ 37
- ☐ 38
- ☐ 39
- ☐ 40
- ☐ 41
- ☐ 42
- ☐ 43
- ☐ 44
- ☐ 45
- ☐ 46
- ☐ 47
- ☐ 48
- ☐ 49
- ☐ 50
- ☐ 51
- ☐ 52
- ☐ 53
- ☐ 54
- ☐ 55
- ☐ 56
- ☐ 57
- ☐ 58
- ☐ 59
- ☐ 60
- ☐ 61
- ☐ 62
- ☐ 63
- ☐ 64
- ☐ 65
- ☐ 66
- ☐ 67
- ☐ 68

- ☐ 69
- ☐ 70
- ☐ 71
- ☐ 72
- ☐ 73
- ☐ 74
- ☐ 75
- ☐ 76
- ☐ 77
- ☐ 78
- ☐ 79
- ☐ 80
- ☐ 81
- ☐ 82
- ☐ 83
- ☐ 84
- ☐ 85
- ☐ 86
- ☐ 87
- ☐ 88
- ☐ 89
- ☐ 90
- ☐ 91
- ☐ 92
- ☐ 93
- ☐ 94
- ☐ 95
- ☐ 96
- ☐ 97
- ☐ 98
- ☐ 99
- ☐ Don't know

---

At what age were you first told you had fish allergy?

- ☐ 0
- ☐ 1
- ☐ 2
- ☐ 3
- ☐ 4
- ☐ 5
- ☐ 6
- ☐ 7
- ☐ 8
- ☐ 9
- ☐ 10
- ☐ 11
- ☐ 12
- ☐ 13
- ☐ 14
- ☐ 15
- ☐ 16
- ☐ 17
- ☐ 18
- ☐ 19
- ☐ 20
- ☐ 21
- ☐ 22
- ☐ 23
- ☐ 24
- ☐ 25
- ☐ 26
- ☐ 27
- ☐ 28
- ☐ 29
- ☐ 30
- ☐ 31
- ☐ 32
- ☐ 33
- ☐ 34
- ☐ 35
- ☐ 36
- ☐ 37
- ☐ 38
- ☐ 39
- ☐ 40
- ☐ 41
- ☐ 42
- ☐ 43
- ☐ 44
- ☐ 45
- ☐ 46
- ☐ 47
- ☐ 48
- ☐ 49
- ☐ 50
- ☐ 51
- ☐ 52
- ☐ 53
- ☐ 54
- ☐ 55
- ☐ 56
- ☐ 57
- ☐ 58
- ☐ 59
- ☐ 60
- ☐ 61
- ☐ 62
- ☐ 63
- ☐ 64
- ☐ 65
- ☐ 66
- ☐ 67
- ☐ 68

- ☐ 69
- ☐ 70
- ☐ 71
- ☐ 72
- ☐ 73
- ☐ 74
- ☐ 75
- ☐ 76
- ☐ 77
- ☐ 78
- ☐ 79
- ☐ 80
- ☐ 81
- ☐ 82
- ☐ 83
- ☐ 84
- ☐ 85
- ☐ 86
- ☐ 87
- ☐ 88
- ☐ 89
- ☐ 90
- ☐ 91
- ☐ 92
- ☐ 93
- ☐ 94
- ☐ 95
- ☐ 96
- ☐ 97
- ☐ 98
- ☐ 99
- ☐ Don't know

At what age were you first told you had shellfish allergy?

- ☐ 0
- ☐ 1
- ☐ 2
- ☐ 3
- ☐ 4
- ☐ 5
- ☐ 6
- ☐ 7
- ☐ 8
- ☐ 9
- ☐ 10
- ☐ 11
- ☐ 12
- ☐ 13
- ☐ 14
- ☐ 15
- ☐ 16
- ☐ 17
- ☐ 18
- ☐ 19
- ☐ 20
- ☐ 21
- ☐ 22
- ☐ 23
- ☐ 24
- ☐ 25
- ☐ 26
- ☐ 27
- ☐ 28
- ☐ 29
- ☐ 30
- ☐ 31
- ☐ 32
- ☐ 33
- ☐ 34
- ☐ 35
- ☐ 36
- ☐ 37
- ☐ 38
- ☐ 39
- ☐ 40
- ☐ 41
- ☐ 42
- ☐ 43
- ☐ 44
- ☐ 45
- ☐ 46
- ☐ 47
- ☐ 48
- ☐ 49
- ☐ 50
- ☐ 51
- ☐ 52
- ☐ 53
- ☐ 54
- ☐ 55
- ☐ 56
- ☐ 57
- ☐ 58
- ☐ 59
- ☐ 60
- ☐ 61
- ☐ 62
- ☐ 63
- ☐ 64
- ☐ 65
- ☐ 66
- ☐ 67
- ☐ 68

- ☐ 69
- ☐ 70
- ☐ 71
- ☐ 72
- ☐ 73
- ☐ 74
- ☐ 75
- ☐ 76
- ☐ 77
- ☐ 78
- ☐ 79
- ☐ 80
- ☐ 81
- ☐ 82
- ☐ 83
- ☐ 84
- ☐ 85
- ☐ 86
- ☐ 87
- ☐ 88
- ☐ 89
- ☐ 90
- ☐ 91
- ☐ 92
- ☐ 93
- ☐ 94
- ☐ 95
- ☐ 96
- ☐ 97
- ☐ 98
- ☐ 99
- ☐ Don't know



---

At what age were you first told you had soy allergy?

- ☐ 0
- ☐ 1
- ☐ 2
- ☐ 3
- ☐ 4
- ☐ 5
- ☐ 6
- ☐ 7
- ☐ 8
- ☐ 9
- ☐ 10
- ☐ 11
- ☐ 12
- ☐ 13
- ☐ 14
- ☐ 15
- ☐ 16
- ☐ 17
- ☐ 18
- ☐ 19
- ☐ 20
- ☐ 21
- ☐ 22
- ☐ 23
- ☐ 24
- ☐ 25
- ☐ 26
- ☐ 27
- ☐ 28
- ☐ 29
- ☐ 30
- ☐ 31
- ☐ 32
- ☐ 33
- ☐ 34
- ☐ 35
- ☐ 36
- ☐ 37
- ☐ 38
- ☐ 39
- ☐ 40
- ☐ 41
- ☐ 42
- ☐ 43
- ☐ 44
- ☐ 45
- ☐ 46
- ☐ 47
- ☐ 48
- ☐ 49
- ☐ 50
- ☐ 51
- ☐ 52
- ☐ 53
- ☐ 54
- ☐ 55
- ☐ 56
- ☐ 57
- ☐ 58
- ☐ 59
- ☐ 60
- ☐ 61
- ☐ 62
- ☐ 63
- ☐ 64
- ☐ 65
- ☐ 66
- ☐ 67
- ☐ 68

- ☐ 69
- ☐ 70
- ☐ 71
- ☐ 72
- ☐ 73
- ☐ 74
- ☐ 75
- ☐ 76
- ☐ 77
- ☐ 78
- ☐ 79
- ☐ 80
- ☐ 81
- ☐ 82
- ☐ 83
- ☐ 84
- ☐ 85
- ☐ 86
- ☐ 87
- ☐ 88
- ☐ 89
- ☐ 90
- ☐ 91
- ☐ 92
- ☐ 93
- ☐ 94
- ☐ 95
- ☐ 96
- ☐ 97
- ☐ 98
- ☐ 99
- ☐ Don't know

---

At what age were you first told you had lupin allergy?

- ☐ 0
- ☐ 1
- ☐ 2
- ☐ 3
- ☐ 4
- ☐ 5
- ☐ 6
- ☐ 7
- ☐ 8
- ☐ 9
- ☐ 10
- ☐ 11
- ☐ 12
- ☐ 13
- ☐ 14
- ☐ 15
- ☐ 16
- ☐ 17
- ☐ 18
- ☐ 19
- ☐ 20
- ☐ 21
- ☐ 22
- ☐ 23
- ☐ 24
- ☐ 25
- ☐ 26
- ☐ 27
- ☐ 28
- ☐ 29
- ☐ 30
- ☐ 31
- ☐ 32
- ☐ 33
- ☐ 34
- ☐ 35
- ☐ 36
- ☐ 37
- ☐ 38
- ☐ 39
- ☐ 40
- ☐ 41
- ☐ 42
- ☐ 43
- ☐ 44
- ☐ 45
- ☐ 46
- ☐ 47
- ☐ 48
- ☐ 49
- ☐ 50
- ☐ 51
- ☐ 52
- ☐ 53
- ☐ 54
- ☐ 55
- ☐ 56
- ☐ 57
- ☐ 58
- ☐ 59
- ☐ 60
- ☐ 61
- ☐ 62
- ☐ 63
- ☐ 64
- ☐ 65
- ☐ 66
- ☐ 67
- ☐ 68

- ☐ 69
- ☐ 70
- ☐ 71
- ☐ 72
- ☐ 73
- ☐ 74
- ☐ 75
- ☐ 76
- ☐ 77
- ☐ 78
- ☐ 79
- ☐ 80
- ☐ 81
- ☐ 82
- ☐ 83
- ☐ 84
- ☐ 85
- ☐ 86
- ☐ 87
- ☐ 88
- ☐ 89
- ☐ 90
- ☐ 91
- ☐ 92
- ☐ 93
- ☐ 94
- ☐ 95
- ☐ 96
- ☐ 97
- ☐ 98
- ☐ 99
- ☐ Don't know

At what age were you first told you had coeliac disease (confirmed by biopsy)?

- ☐ 0
- ☐ 1
- ☐ 2
- ☐ 3
- ☐ 4
- ☐ 5
- ☐ 6
- ☐ 7
- ☐ 8
- ☐ 9
- ☐ 10
- ☐ 11
- ☐ 12
- ☐ 13
- ☐ 14
- ☐ 15
- ☐ 16
- ☐ 17
- ☐ 18
- ☐ 19
- ☐ 20
- ☐ 21
- ☐ 22
- ☐ 23
- ☐ 24
- ☐ 25
- ☐ 26
- ☐ 27
- ☐ 28
- ☐ 29
- ☐ 30
- ☐ 31
- ☐ 32
- ☐ 33
- ☐ 34
- ☐ 35
- ☐ 36
- ☐ 37
- ☐ 38
- ☐ 39
- ☐ 40
- ☐ 41
- ☐ 42
- ☐ 43
- ☐ 44
- ☐ 45
- ☐ 46
- ☐ 47
- ☐ 48
- ☐ 49
- ☐ 50
- ☐ 51
- ☐ 52
- ☐ 53
- ☐ 54
- ☐ 55
- ☐ 56
- ☐ 57
- ☐ 58
- ☐ 59
- ☐ 60
- ☐ 61
- ☐ 62
- ☐ 63
- ☐ 64
- ☐ 65
- ☐ 66
- ☐ 67
- ☐ 68

- ☐ 69
- ☐ 70
- ☐ 71
- ☐ 72
- ☐ 73
- ☐ 74
- ☐ 75
- ☐ 76
- ☐ 77
- ☐ 78
- ☐ 79
- ☐ 80
- ☐ 81
- ☐ 82
- ☐ 83
- ☐ 84
- ☐ 85
- ☐ 86
- ☐ 87
- ☐ 88
- ☐ 89
- ☐ 90
- ☐ 91
- ☐ 92
- ☐ 93
- ☐ 94
- ☐ 95
- ☐ 96
- ☐ 97
- ☐ 98
- ☐ 99
- ☐ Don't know

At what age were you first told you had gluten/wheat sensitivity (non-coeliac disease)?

- ☐ 0
- ☐ 1
- ☐ 2
- ☐ 3
- ☐ 4
- ☐ 5
- ☐ 6
- ☐ 7
- ☐ 8
- ☐ 9
- ☐ 10
- ☐ 11
- ☐ 12
- ☐ 13
- ☐ 14
- ☐ 15
- ☐ 16
- ☐ 17
- ☐ 18
- ☐ 19
- ☐ 20
- ☐ 21
- ☐ 22
- ☐ 23
- ☐ 24
- ☐ 25
- ☐ 26
- ☐ 27
- ☐ 28
- ☐ 29
- ☐ 30
- ☐ 31
- ☐ 32
- ☐ 33
- ☐ 34
- ☐ 35
- ☐ 36
- ☐ 37
- ☐ 38
- ☐ 39
- ☐ 40
- ☐ 41
- ☐ 42
- ☐ 43
- ☐ 44
- ☐ 45
- ☐ 46
- ☐ 47
- ☐ 48
- ☐ 49
- ☐ 50
- ☐ 51
- ☐ 52
- ☐ 53
- ☐ 54
- ☐ 55
- ☐ 56
- ☐ 57
- ☐ 58
- ☐ 59
- ☐ 60
- ☐ 61
- ☐ 62
- ☐ 63
- ☐ 64
- ☐ 65
- ☐ 66
- ☐ 67
- ☐ 68

- ☐ 69
- ☐ 70
- ☐ 71
- ☐ 72
- ☐ 73
- ☐ 74
- ☐ 75
- ☐ 76
- ☐ 77
- ☐ 78
- ☐ 79
- ☐ 80
- ☐ 81
- ☐ 82
- ☐ 83
- ☐ 84
- ☐ 85
- ☐ 86
- ☐ 87
- ☐ 88
- ☐ 89
- ☐ 90
- ☐ 91
- ☐ 92
- ☐ 93
- ☐ 94
- ☐ 95
- ☐ 96
- ☐ 97
- ☐ 98
- ☐ 99
- ☐ Don't know



---

At what age were you first told you had wheat allergy?

- ☐ 0
- ☐ 1
- ☐ 2
- ☐ 3
- ☐ 4
- ☐ 5
- ☐ 6
- ☐ 7
- ☐ 8
- ☐ 9
- ☐ 10
- ☐ 11
- ☐ 12
- ☐ 13
- ☐ 14
- ☐ 15
- ☐ 16
- ☐ 17
- ☐ 18
- ☐ 19
- ☐ 20
- ☐ 21
- ☐ 22
- ☐ 23
- ☐ 24
- ☐ 25
- ☐ 26
- ☐ 27
- ☐ 28
- ☐ 29
- ☐ 30
- ☐ 31
- ☐ 32
- ☐ 33
- ☐ 34
- ☐ 35
- ☐ 36
- ☐ 37
- ☐ 38
- ☐ 39
- ☐ 40
- ☐ 41
- ☐ 42
- ☐ 43
- ☐ 44
- ☐ 45
- ☐ 46
- ☐ 47
- ☐ 48
- ☐ 49
- ☐ 50
- ☐ 51
- ☐ 52
- ☐ 53
- ☐ 54
- ☐ 55
- ☐ 56
- ☐ 57
- ☐ 58
- ☐ 59
- ☐ 60
- ☐ 61
- ☐ 62
- ☐ 63
- ☐ 64
- ☐ 65
- ☐ 66
- ☐ 67
- ☐ 68

- ☐ 69
- ☐ 70
- ☐ 71
- ☐ 72
- ☐ 73
- ☐ 74
- ☐ 75
- ☐ 76
- ☐ 77
- ☐ 78
- ☐ 79
- ☐ 80
- ☐ 81
- ☐ 82
- ☐ 83
- ☐ 84
- ☐ 85
- ☐ 86
- ☐ 87
- ☐ 88
- ☐ 89
- ☐ 90
- ☐ 91
- ☐ 92
- ☐ 93
- ☐ 94
- ☐ 95
- ☐ 96
- ☐ 97
- ☐ 98
- ☐ 99
- ☐ Don't know

---

At what age were you first told you had yeast allergy?

- ☐ 0
- ☐ 1
- ☐ 2
- ☐ 3
- ☐ 4
- ☐ 5
- ☐ 6
- ☐ 7
- ☐ 8
- ☐ 9
- ☐ 10
- ☐ 11
- ☐ 12
- ☐ 13
- ☐ 14
- ☐ 15
- ☐ 16
- ☐ 17
- ☐ 18
- ☐ 19
- ☐ 20
- ☐ 21
- ☐ 22
- ☐ 23
- ☐ 24
- ☐ 25
- ☐ 26
- ☐ 27
- ☐ 28
- ☐ 29
- ☐ 30
- ☐ 31
- ☐ 32
- ☐ 33
- ☐ 34
- ☐ 35
- ☐ 36
- ☐ 37
- ☐ 38
- ☐ 39
- ☐ 40
- ☐ 41
- ☐ 42
- ☐ 43
- ☐ 44
- ☐ 45
- ☐ 46
- ☐ 47
- ☐ 48
- ☐ 49
- ☐ 50
- ☐ 51
- ☐ 52
- ☐ 53
- ☐ 54
- ☐ 55
- ☐ 56
- ☐ 57
- ☐ 58
- ☐ 59
- ☐ 60
- ☐ 61
- ☐ 62
- ☐ 63
- ☐ 64
- ☐ 65
- ☐ 66
- ☐ 67
- ☐ 68

- ☐ 69
- ☐ 70
- ☐ 71
- ☐ 72
- ☐ 73
- ☐ 74
- ☐ 75
- ☐ 76
- ☐ 77
- ☐ 78
- ☐ 79
- ☐ 80
- ☐ 81
- ☐ 82
- ☐ 83
- ☐ 84
- ☐ 85
- ☐ 86
- ☐ 87
- ☐ 88
- ☐ 89
- ☐ 90
- ☐ 91
- ☐ 92
- ☐ 93
- ☐ 94
- ☐ 95
- ☐ 96
- ☐ 97
- ☐ 98
- ☐ 99
- ☐ Don't know

At what age were you first told you had salicylate intolerance?

- ☐ 0
- ☐ 1
- ☐ 2
- ☐ 3
- ☐ 4
- ☐ 5
- ☐ 6
- ☐ 7
- ☐ 8
- ☐ 9
- ☐ 10
- ☐ 11
- ☐ 12
- ☐ 13
- ☐ 14
- ☐ 15
- ☐ 16
- ☐ 17
- ☐ 18
- ☐ 19
- ☐ 20
- ☐ 21
- ☐ 22
- ☐ 23
- ☐ 24
- ☐ 25
- ☐ 26
- ☐ 27
- ☐ 28
- ☐ 29
- ☐ 30
- ☐ 31
- ☐ 32
- ☐ 33
- ☐ 34
- ☐ 35
- ☐ 36
- ☐ 37
- ☐ 38
- ☐ 39
- ☐ 40
- ☐ 41
- ☐ 42
- ☐ 43
- ☐ 44
- ☐ 45
- ☐ 46
- ☐ 47
- ☐ 48
- ☐ 49
- ☐ 50
- ☐ 51
- ☐ 52
- ☐ 53
- ☐ 54
- ☐ 55
- ☐ 56
- ☐ 57
- ☐ 58
- ☐ 59
- ☐ 60
- ☐ 61
- ☐ 62
- ☐ 63
- ☐ 64
- ☐ 65
- ☐ 66
- ☐ 67
- ☐ 68

- ☐ 69
- ☐ 70
- ☐ 71
- ☐ 72
- ☐ 73
- ☐ 74
- ☐ 75
- ☐ 76
- ☐ 77
- ☐ 78
- ☐ 79
- ☐ 80
- ☐ 81
- ☐ 82
- ☐ 83
- ☐ 84
- ☐ 85
- ☐ 86
- ☐ 87
- ☐ 88
- ☐ 89
- ☐ 90
- ☐ 91
- ☐ 92
- ☐ 93
- ☐ 94
- ☐ 95
- ☐ 96
- ☐ 97
- ☐ 98
- ☐ 99
- ☐ Don't know

At what age were you first told you had amine  
intolerance?

- ☐ 0
- ☐ 1
- ☐ 2
- ☐ 3
- ☐ 4
- ☐ 5
- ☐ 6
- ☐ 7
- ☐ 8
- ☐ 9
- ☐ 10
- ☐ 11
- ☐ 12
- ☐ 13
- ☐ 14
- ☐ 15
- ☐ 16
- ☐ 17
- ☐ 18
- ☐ 19
- ☐ 20
- ☐ 21
- ☐ 22
- ☐ 23
- ☐ 24
- ☐ 25
- ☐ 26
- ☐ 27
- ☐ 28
- ☐ 29
- ☐ 30
- ☐ 31
- ☐ 32
- ☐ 33
- ☐ 34
- ☐ 35
- ☐ 36
- ☐ 37
- ☐ 38
- ☐ 39
- ☐ 40
- ☐ 41
- ☐ 42
- ☐ 43
- ☐ 44
- ☐ 45
- ☐ 46
- ☐ 47
- ☐ 48
- ☐ 49
- ☐ 50
- ☐ 51
- ☐ 52
- ☐ 53
- ☐ 54
- ☐ 55
- ☐ 56
- ☐ 57
- ☐ 58
- ☐ 59
- ☐ 60
- ☐ 61
- ☐ 62
- ☐ 63
- ☐ 64
- ☐ 65
- ☐ 66
- ☐ 67
- ☐ 68

- ☐ 69
- ☐ 70
- ☐ 71
- ☐ 72
- ☐ 73
- ☐ 74
- ☐ 75
- ☐ 76
- ☐ 77
- ☐ 78
- ☐ 79
- ☐ 80
- ☐ 81
- ☐ 82
- ☐ 83
- ☐ 84
- ☐ 85
- ☐ 86
- ☐ 87
- ☐ 88
- ☐ 89
- ☐ 90
- ☐ 91
- ☐ 92
- ☐ 93
- ☐ 94
- ☐ 95
- ☐ 96
- ☐ 97
- ☐ 98
- ☐ 99
- ☐ Don't know



At what age were you first told you had glutamate intolerance?

- ☐ 0
- ☐ 1
- ☐ 2
- ☐ 3
- ☐ 4
- ☐ 5
- ☐ 6
- ☐ 7
- ☐ 8
- ☐ 9
- ☐ 10
- ☐ 11
- ☐ 12
- ☐ 13
- ☐ 14
- ☐ 15
- ☐ 16
- ☐ 17
- ☐ 18
- ☐ 19
- ☐ 20
- ☐ 21
- ☐ 22
- ☐ 23
- ☐ 24
- ☐ 25
- ☐ 26
- ☐ 27
- ☐ 28
- ☐ 29
- ☐ 30
- ☐ 31
- ☐ 32
- ☐ 33
- ☐ 34
- ☐ 35
- ☐ 36
- ☐ 37
- ☐ 38
- ☐ 39
- ☐ 40
- ☐ 41
- ☐ 42
- ☐ 43
- ☐ 44
- ☐ 45
- ☐ 46
- ☐ 47
- ☐ 48
- ☐ 49
- ☐ 50
- ☐ 51
- ☐ 52
- ☐ 53
- ☐ 54
- ☐ 55
- ☐ 56
- ☐ 57
- ☐ 58
- ☐ 59
- ☐ 60
- ☐ 61
- ☐ 62
- ☐ 63
- ☐ 64
- ☐ 65
- ☐ 66
- ☐ 67
- ☐ 68

- ☐ 69
- ☐ 70
- ☐ 71
- ☐ 72
- ☐ 73
- ☐ 74
- ☐ 75
- ☐ 76
- ☐ 77
- ☐ 78
- ☐ 79
- ☐ 80
- ☐ 81
- ☐ 82
- ☐ 83
- ☐ 84
- ☐ 85
- ☐ 86
- ☐ 87
- ☐ 88
- ☐ 89
- ☐ 90
- ☐ 91
- ☐ 92
- ☐ 93
- ☐ 94
- ☐ 95
- ☐ 96
- ☐ 97
- ☐ 98
- ☐ 99
- ☐ Don't know

At what age were you first told you had  
colour/flavour/preservative (e.g. sulphite)  
intolerance?

- ☐ 0
- ☐ 1
- ☐ 2
- ☐ 3
- ☐ 4
- ☐ 5
- ☐ 6
- ☐ 7
- ☐ 8
- ☐ 9
- ☐ 10
- ☐ 11
- ☐ 12
- ☐ 13
- ☐ 14
- ☐ 15
- ☐ 16
- ☐ 17
- ☐ 18
- ☐ 19
- ☐ 20
- ☐ 21
- ☐ 22
- ☐ 23
- ☐ 24
- ☐ 25
- ☐ 26
- ☐ 27
- ☐ 28
- ☐ 29
- ☐ 30
- ☐ 31
- ☐ 32
- ☐ 33
- ☐ 34
- ☐ 35
- ☐ 36
- ☐ 37
- ☐ 38
- ☐ 39
- ☐ 40
- ☐ 41
- ☐ 42
- ☐ 43
- ☐ 44
- ☐ 45
- ☐ 46
- ☐ 47
- ☐ 48
- ☐ 49
- ☐ 50
- ☐ 51
- ☐ 52
- ☐ 53
- ☐ 54
- ☐ 55
- ☐ 56
- ☐ 57
- ☐ 58
- ☐ 59
- ☐ 60
- ☐ 61
- ☐ 62
- ☐ 63
- ☐ 64
- ☐ 65
- ☐ 66
- ☐ 67
- ☐ 68

- ☐ 69
- ☐ 70
- ☐ 71
- ☐ 72
- ☐ 73
- ☐ 74
- ☐ 75
- ☐ 76
- ☐ 77
- ☐ 78
- ☐ 79
- ☐ 80
- ☐ 81
- ☐ 82
- ☐ 83
- ☐ 84
- ☐ 85
- ☐ 86
- ☐ 87
- ☐ 88
- ☐ 89
- ☐ 90
- ☐ 91
- ☐ 92
- ☐ 93
- ☐ 94
- ☐ 95
- ☐ 96
- ☐ 97
- ☐ 98
- ☐ 99
- ☐ Don't know

At what age were you first told you had FODMAPS  
intolerance (e.g. fructans, fructose)?

- ☐ 0
- ☐ 1
- ☐ 2
- ☐ 3
- ☐ 4
- ☐ 5
- ☐ 6
- ☐ 7
- ☐ 8
- ☐ 9
- ☐ 10
- ☐ 11
- ☐ 12
- ☐ 13
- ☐ 14
- ☐ 15
- ☐ 16
- ☐ 17
- ☐ 18
- ☐ 19
- ☐ 20
- ☐ 21
- ☐ 22
- ☐ 23
- ☐ 24
- ☐ 25
- ☐ 26
- ☐ 27
- ☐ 28
- ☐ 29
- ☐ 30
- ☐ 31
- ☐ 32
- ☐ 33
- ☐ 34
- ☐ 35
- ☐ 36
- ☐ 37
- ☐ 38
- ☐ 39
- ☐ 40
- ☐ 41
- ☐ 42
- ☐ 43
- ☐ 44
- ☐ 45
- ☐ 46
- ☐ 47
- ☐ 48
- ☐ 49
- ☐ 50
- ☐ 51
- ☐ 52
- ☐ 53
- ☐ 54
- ☐ 55
- ☐ 56
- ☐ 57
- ☐ 58
- ☐ 59
- ☐ 60
- ☐ 61
- ☐ 62
- ☐ 63
- ☐ 64
- ☐ 65
- ☐ 66
- ☐ 67
- ☐ 68

- ☐ 69
- ☐ 70
- ☐ 71
- ☐ 72
- ☐ 73
- ☐ 74
- ☐ 75
- ☐ 76
- ☐ 77
- ☐ 78
- ☐ 79
- ☐ 80
- ☐ 81
- ☐ 82
- ☐ 83
- ☐ 84
- ☐ 85
- ☐ 86
- ☐ 87
- ☐ 88
- ☐ 89
- ☐ 90
- ☐ 91
- ☐ 92
- ☐ 93
- ☐ 94
- ☐ 95
- ☐ 96
- ☐ 97
- ☐ 98
- ☐ 99
- ☐ Don't know

At what age were you first told you had  
[allergy\_others]?

- ☐ 0
- ☐ 1
- ☐ 2
- ☐ 3
- ☐ 4
- ☐ 5
- ☐ 6
- ☐ 7
- ☐ 8
- ☐ 9
- ☐ 10
- ☐ 11
- ☐ 12
- ☐ 13
- ☐ 14
- ☐ 15
- ☐ 16
- ☐ 17
- ☐ 18
- ☐ 19
- ☐ 20
- ☐ 21
- ☐ 22
- ☐ 23
- ☐ 24
- ☐ 25
- ☐ 26
- ☐ 27
- ☐ 28
- ☐ 29
- ☐ 30
- ☐ 31
- ☐ 32
- ☐ 33
- ☐ 34
- ☐ 35
- ☐ 36
- ☐ 37
- ☐ 38
- ☐ 39
- ☐ 40
- ☐ 41
- ☐ 42
- ☐ 43
- ☐ 44
- ☐ 45
- ☐ 46
- ☐ 47
- ☐ 48
- ☐ 49
- ☐ 50
- ☐ 51
- ☐ 52
- ☐ 53
- ☐ 54
- ☐ 55
- ☐ 56
- ☐ 57
- ☐ 58
- ☐ 59
- ☐ 60
- ☐ 61
- ☐ 62
- ☐ 63
- ☐ 64
- ☐ 65
- ☐ 66
- ☐ 67
- ☐ 68

- ☐ 69
- ☐ 70
- ☐ 71
- ☐ 72
- ☐ 73
- ☐ 74
- ☐ 75
- ☐ 76
- ☐ 77
- ☐ 78
- ☐ 79
- ☐ 80
- ☐ 81
- ☐ 82
- ☐ 83
- ☐ 84
- ☐ 85
- ☐ 86
- ☐ 87
- ☐ 88
- ☐ 89
- ☐ 90
- ☐ 91
- ☐ 92
- ☐ 93
- ☐ 94
- ☐ 95
- ☐ 96
- ☐ 97
- ☐ 98
- ☐ 99
- ☐ Don't know



At what age were you first told you had  
[allergy\_others\_2]?

- ☐ 0
- ☐ 1
- ☐ 2
- ☐ 3
- ☐ 4
- ☐ 5
- ☐ 6
- ☐ 7
- ☐ 8
- ☐ 9
- ☐ 10
- ☐ 11
- ☐ 12
- ☐ 13
- ☐ 14
- ☐ 15
- ☐ 16
- ☐ 17
- ☐ 18
- ☐ 19
- ☐ 20
- ☐ 21
- ☐ 22
- ☐ 23
- ☐ 24
- ☐ 25
- ☐ 26
- ☐ 27
- ☐ 28
- ☐ 29
- ☐ 30
- ☐ 31
- ☐ 32
- ☐ 33
- ☐ 34
- ☐ 35
- ☐ 36
- ☐ 37
- ☐ 38
- ☐ 39
- ☐ 40
- ☐ 41
- ☐ 42
- ☐ 43
- ☐ 44
- ☐ 45
- ☐ 46
- ☐ 47
- ☐ 48
- ☐ 49
- ☐ 50
- ☐ 51
- ☐ 52
- ☐ 53
- ☐ 54
- ☐ 55
- ☐ 56
- ☐ 57
- ☐ 58
- ☐ 59
- ☐ 60
- ☐ 61
- ☐ 62
- ☐ 63
- ☐ 64
- ☐ 65
- ☐ 66
- ☐ 67
- ☐ 68

- ☐ 69
- ☐ 70
- ☐ 71
- ☐ 72
- ☐ 73
- ☐ 74
- ☐ 75
- ☐ 76
- ☐ 77
- ☐ 78
- ☐ 79
- ☐ 80
- ☐ 81
- ☐ 82
- ☐ 83
- ☐ 84
- ☐ 85
- ☐ 86
- ☐ 87
- ☐ 88
- ☐ 89
- ☐ 90
- ☐ 91
- ☐ 92
- ☐ 93
- ☐ 94
- ☐ 95
- ☐ 96
- ☐ 97
- ☐ 98
- ☐ 99
- ☐ Don't know

At what age were you first told you had  
[allergy\_others\_3]?

- ☐ 0
- ☐ 1
- ☐ 2
- ☐ 3
- ☐ 4
- ☐ 5
- ☐ 6
- ☐ 7
- ☐ 8
- ☐ 9
- ☐ 10
- ☐ 11
- ☐ 12
- ☐ 13
- ☐ 14
- ☐ 15
- ☐ 16
- ☐ 17
- ☐ 18
- ☐ 19
- ☐ 20
- ☐ 21
- ☐ 22
- ☐ 23
- ☐ 24
- ☐ 25
- ☐ 26
- ☐ 27
- ☐ 28
- ☐ 29
- ☐ 30
- ☐ 31
- ☐ 32
- ☐ 33
- ☐ 34
- ☐ 35
- ☐ 36
- ☐ 37
- ☐ 38
- ☐ 39
- ☐ 40
- ☐ 41
- ☐ 42
- ☐ 43
- ☐ 44
- ☐ 45
- ☐ 46
- ☐ 47
- ☐ 48
- ☐ 49
- ☐ 50
- ☐ 51
- ☐ 52
- ☐ 53
- ☐ 54
- ☐ 55
- ☐ 56
- ☐ 57
- ☐ 58
- ☐ 59
- ☐ 60
- ☐ 61
- ☐ 62
- ☐ 63
- ☐ 64
- ☐ 65
- ☐ 66
- ☐ 67
- ☐ 68

- ☐ 69
- ☐ 70
- ☐ 71
- ☐ 72
- ☐ 73
- ☐ 74
- ☐ 75
- ☐ 76
- ☐ 77
- ☐ 78
- ☐ 79
- ☐ 80
- ☐ 81
- ☐ 82
- ☐ 83
- ☐ 84
- ☐ 85
- ☐ 86
- ☐ 87
- ☐ 88
- ☐ 89
- ☐ 90
- ☐ 91
- ☐ 92
- ☐ 93
- ☐ 94
- ☐ 95
- ☐ 96
- ☐ 97
- ☐ 98
- ☐ 99
- ☐ Don't know

At what age were you first told you had this condition?

- ☐ 0
- ☐ 1
- ☐ 2
- ☐ 3
- ☐ 4
- ☐ 5
- ☐ 6
- ☐ 7
- ☐ 8
- ☐ 9
- ☐ 10
- ☐ 11
- ☐ 12
- ☐ 13
- ☐ 14
- ☐ 15
- ☐ 16
- ☐ 17
- ☐ 18
- ☐ 19
- ☐ 20
- ☐ 21
- ☐ 22
- ☐ 23
- ☐ 24
- ☐ 25
- ☐ 26
- ☐ 27
- ☐ 28
- ☐ 29
- ☐ 30
- ☐ 31
- ☐ 32
- ☐ 33
- ☐ 34
- ☐ 35
- ☐ 36
- ☐ 37
- ☐ 38
- ☐ 39
- ☐ 40
- ☐ 41
- ☐ 42
- ☐ 43
- ☐ 44
- ☐ 45
- ☐ 46
- ☐ 47
- ☐ 48
- ☐ 49
- ☐ 50
- ☐ 51
- ☐ 52
- ☐ 53
- ☐ 54
- ☐ 55
- ☐ 56
- ☐ 57
- ☐ 58
- ☐ 59
- ☐ 60
- ☐ 61
- ☐ 62
- ☐ 63
- ☐ 64
- ☐ 65
- ☐ 66
- ☐ 67
- ☐ 68

- ☐ 69
- ☐ 70
- ☐ 71
- ☐ 72
- ☐ 73
- ☐ 74
- ☐ 75
- ☐ 76
- ☐ 77
- ☐ 78
- ☐ 79
- ☐ 80
- ☐ 81
- ☐ 82
- ☐ 83
- ☐ 84
- ☐ 85
- ☐ 86
- ☐ 87
- ☐ 88
- ☐ 89
- ☐ 90
- ☐ 91
- ☐ 92
- ☐ 93
- ☐ 94
- ☐ 95
- ☐ 96
- ☐ 97
- ☐ 98
- ☐ 99
- ☐ Don't know

---

Do you still have egg allergy?

- ☐ Yes
- ☐ No
- ☐ Don't know

---

Do you still have milk/dairy allergy?

- ☐ Yes
- ☐ No
- ☐ Don't know

---

Do you still have milk/dairy/lactose intolerance?

- ☐ Yes
- ☐ No
- ☐ Don't know

---

Do you still have peanut allergy?

- ☐ Yes
- ☐ No
- ☐ Don't know

---

Do you still have nut allergy (e.g. cashew, hazelnut, walnut)?

- ☐ Yes
- ☐ No
- ☐ Don't know

---

Do you still have fish allergy?

- ☐ Yes
- ☐ No
- ☐ Don't know

---

Do you still have shellfish allergy?

- ☐ Yes
- ☐ No
- ☐ Don't know

---

Do you still have soy allergy? ☐ Yes  
☐ No  
☐ Don't know

---

Do you still have lupin allergy? ☐ Yes  
☐ No  
☐ Don't know

---

Do you still have coeliac disease? ☐ Yes  
☐ No  
☐ Don't know

---

Do you still have gluten/wheat sensitivity (non-coeliac disease)? ☐ Yes  
☐ No  
☐ Don't know

---

Do you still have wheat allergy? ☐ Yes  
☐ No  
☐ Don't know

---

Do you still have yeast allergy? ☐ Yes  
☐ No  
☐ Don't know

---

Do you still have salicylate intolerance? ☐ Yes  
☐ No  
☐ Don't know

---

Do you still have amine intolerance? ☐ Yes  
☐ No  
☐ Don't know

---

Do you still have glutamate intolerance? ☐ Yes  
☐ No  
☐ Don't know

---

Do you still have colour/flavour/preservative (e.g. sulphite) intolerance? ☐ Yes  
☐ No  
☐ Don't know

---

Do you still have FODMAPS intolerance (e.g. fructans, fructose)? ☐ Yes  
☐ No  
☐ Don't know

---

Do you still have [allergy\_others]? ☐ Yes  
☐ No  
☐ Don't know

---

Do you still have [allergy\_others\_2]? ☐ Yes  
☐ No  
☐ Don't know

---

Do you still have [allergy\_others\_3]? ☐ Yes  
☐ No  
☐ Don't know

---

---

Do you still have this condition?

- ☐ Yes  
☐ No  
☐ Don't know
- 

How is egg allergy treated?  
(Tick all that apply)

- ☐ no treatment ☐ diet ☐ exercise ☐ medication (please specify) ☐ natural/herbal therapy (please specify)  
☐ weight management ☐ supplements (please specify) ☐ other (please specify)  
☐ Don't know
- 

please specify the medication

---

please specify the natural/herbal therapy

---

please specify the supplements

---

please specify the treatment

---

---

How is cow's milk/dairy allergy treated?  
(Tick all that apply)

- ☐ no treatment ☐ diet ☐ exercise ☐ medication (please specify) ☐ natural/herbal therapy (please specify)  
☐ weight management ☐ supplements (please specify) ☐ other (please specify)  
☐ Don't know
- 

please specify the medication

---

please specify the natural/herbal therapy

---

please specify the supplements

---

please specify the treatment

---

---

How is cow's milk/dairy/lactose intolerance treated?  
(Tick all that apply)

- ☐ no treatment ☐ diet ☐ exercise ☐ medication (please specify) ☐ natural/herbal therapy (please specify)  
☐ weight management ☐ supplements (please specify) ☐ other (please specify)  
☐ Don't know
- 

please specify the medication

---

please specify the natural/herbal therapy

---

please specify the supplements

---



---

please specify the treatment

---

---

How is peanut allergy treated?  
(Tick all that apply)

- ☐ no treatment   ☐ diet   ☐ exercise   ☐ medication (please specify)   ☐ natural/herbal therapy (please specify)  
☐ weight management   ☐ supplements (please specify)   ☐ other (please specify)  
☐ Don't know
- 

please specify the medication

---

please specify the natural/herbal therapy

---

please specify the supplements

---

please specify the treatment

---

---

How is tree nut allergy (e.g. cashew, hazelnut, walnut) treated?  
(Tick all that apply)

- ☐ no treatment   ☐ diet   ☐ exercise   ☐ medication (please specify)   ☐ natural/herbal therapy (please specify)  
☐ weight management   ☐ supplements (please specify)   ☐ other (please specify)  
☐ Don't know
- 

please specify the medication

---

please specify the natural/herbal therapy

---

please specify the supplements

---

please specify the treatment

---

---

How is fish allergy treated?  
(Tick all that apply)

- ☐ no treatment   ☐ diet   ☐ exercise   ☐ medication (please specify)   ☐ natural/herbal therapy (please specify)  
☐ weight management   ☐ supplements (please specify)   ☐ other (please specify)  
☐ Don't know
- 

please specify the medication

---

please specify the natural/herbal therapy

---

please specify the supplements

---

---

please specify the treatment

---

---

How is shellfish allergy treated?

- ☐ no treatment   ☐ diet   ☐ exercise   ☐ medication (please specify)   ☐ natural/herbal therapy (please specify)   ☐ weight management   ☐ supplements (please specify)   ☐ other (please specify)  
☐ Don't know
- 

---

please specify the medication

---

---

please specify the natural/herbal therapy

---

---

please specify the supplements

---

---

please specify the treatment

---

---

How is soy allergy treated?

(Tick all that apply)

- ☐ no treatment   ☐ diet   ☐ exercise   ☐ medication (please specify)   ☐ natural/herbal therapy (please specify)   ☐ weight management   ☐ supplements (please specify)   ☐ other (please specify)  
☐ Don't know
- 

---

please specify the medication

---

---

please specify the natural/herbal therapy

---

---

please specify the supplements

---

---

please specify the treatment

---

---

How is lupin allergy treated?

(Tick all that apply)

- ☐ no treatment   ☐ diet   ☐ exercise   ☐ medication (please specify)   ☐ natural/herbal therapy (please specify)   ☐ weight management   ☐ supplements (please specify)   ☐ other (please specify)  
☐ Don't know
- 

---

please specify the medication

---

---

please specify the natural/herbal therapy

---

---

please specify the supplements

---

---

please specify the treatment

---

---

How is coeliac disease (confirmed by biopsy) treated?  
(Tick all that apply)

- ☐ no treatment   ☐ diet   ☐ exercise   ☐ medication (please specify)   ☐ natural/herbal therapy (please specify)  
☐ weight management   ☐ supplements (please specify)   ☐ other (please specify)  
☐ Don't know
- 

please specify the medication

---

please specify the natural/herbal therapy

---

please specify the supplements

---

please specify the treatment

---

---

How is gluten/wheat sensitivity (non-coeliac disease) treated?  
(Tick all that apply)

- ☐ no treatment   ☐ diet   ☐ exercise   ☐ medication (please specify)   ☐ natural/herbal therapy (please specify)  
☐ weight management   ☐ supplements (please specify)   ☐ other (please specify)  
☐ Don't know
- 

please specify the medication

---

please specify the natural/herbal therapy

---

please specify the supplements

---

please specify the treatment

---

---

How is wheat allergy treated?  
(Tick all that apply)

- ☐ no treatment   ☐ diet   ☐ exercise   ☐ medication (please specify)   ☐ natural/herbal therapy (please specify)  
☐ weight management   ☐ supplements (please specify)   ☐ other (please specify)  
☐ Don't know
- 

please specify the medication

---

please specify the natural/herbal therapy

---

please specify the supplements

---

---

please specify the treatment

---

---

How is yeast allergy treated?  
(Tick all that apply)

- ☐ no treatment   ☐ diet   ☐ exercise   ☐ medication (please specify)   ☐ natural/herbal therapy (please specify)  
☐ weight management   ☐ supplements (please specify)   ☐ other (please specify)  
☐ Don't know
- 

please specify the medication

---

please specify the natural/herbal therapy

---

please specify the supplements

---

please specify the treatment

---

---

How is salicylate intolerance treated?  
(Tick all that apply)

- ☐ no treatment   ☐ diet   ☐ exercise   ☐ medication (please specify)   ☐ natural/herbal therapy (please specify)  
☐ weight management   ☐ supplements (please specify)   ☐ other (please specify)  
☐ Don't know
- 

please specify the medication

---

please specify the natural/herbal therapy

---

please specify the supplements

---

please specify the treatment

---

---

How is amine intolerance treated?  
(Tick all that apply)

- ☐ no treatment   ☐ diet   ☐ exercise   ☐ medication (please specify)   ☐ natural/herbal therapy (please specify)  
☐ weight management   ☐ supplements (please specify)   ☐ other (please specify)  
☐ Don't know
- 

please specify the medication

---

please specify the natural/herbal therapy

---

please specify the supplements

---

---

please specify the treatment

---

---

How is glutamate intolerance treated?  
(Tick all that apply)

- ☐ no treatment   ☐ diet   ☐ exercise   ☐ medication (please specify)   ☐ natural/herbal therapy (please specify)  
☐ weight management   ☐ supplements (please specify)   ☐ other (please specify)  
☐ Don't know
- 

please specify the medication

---

please specify the natural/herbal therapy

---

please specify the supplements

---

please specify the treatment

---

---

How is colour/flavour/preservative (e.g. sulphite) intolerance treated?  
(Tick all that apply)

- ☐ no treatment   ☐ diet   ☐ exercise   ☐ medication (please specify)   ☐ natural/herbal therapy (please specify)  
☐ weight management   ☐ supplements (please specify)   ☐ other (please specify)  
☐ Don't know
- 

please specify the medication

---

please specify the natural/herbal therapy

---

please specify the supplements

---

please specify the treatment

---

---

How is FODMAPS intolerance (e.g. fructans, fructose) treated?  
(Tick all that apply)

- ☐ no treatment   ☐ diet   ☐ exercise   ☐ medication (please specify)   ☐ natural/herbal therapy (please specify)  
☐ weight management   ☐ supplements (please specify)   ☐ other (please specify)  
☐ Don't know
- 

please specify the medication

---

please specify the natural/herbal therapy

---

please specify the supplements

---

---

please specify the treatment

---

---

How is [allergy\_others] treated?  
(Tick all that apply)

- ☐ no treatment   ☐ diet   ☐ exercise   ☐ medication (please specify)   ☐ natural/herbal therapy (please specify)  
☐ weight management   ☐ supplements (please specify)   ☐ other (please specify)  
☐ Don't know
- 

please specify the medication

---

please specify the natural/herbal therapy

---

please specify the supplements

---

please specify the treatment

---

---

How is [allergy\_others\_2] treated?  
(Tick all that apply)

- ☐ no treatment   ☐ diet   ☐ exercise   ☐ medication (please specify)   ☐ natural/herbal therapy (please specify)  
☐ weight management   ☐ supplements (please specify)   ☐ other (please specify)  
☐ Don't know
- 

please specify the medication

---

please specify the natural/herbal therapy

---

please specify the supplements

---

please specify the treatment

---

---

How is [allergy\_others\_3] treated?  
(Tick all that apply)

- ☐ no treatment   ☐ diet   ☐ exercise   ☐ medication (please specify)   ☐ natural/herbal therapy (please specify)  
☐ weight management   ☐ supplements (please specify)   ☐ other (please specify)  
☐ Don't know
- 

please specify the medication

---

please specify the natural/herbal therapy

---

please specify the supplements

---

---

please specify the treatment

---

---

How is this condition treated?  
(Tick all that apply)

- ☐ no treatment   ☐ diet   ☐ exercise   ☐ medication (please specify)   ☐ natural/herbal therapy (please specify)  
☐ weight management   ☐ supplements (please specify)   ☐ other (please specify)  
☐ Don't know
- 

---

please specify the medication

---

---

please specify the natural/herbal therapy

---

---

please specify the supplements

---

---

please specify the treatment

---

---

Have either of your parents, or any of brothers or sisters ever been told by a doctor (GP or specialist), or dietitian that they any food allergy or intolerance?

- ☐ Yes  
☐ No  
☐ Don't know
- 

---

This question is about conditions that you may experience specifically related to training or competing in sport. Please tick any conditions that you regularly experience in training or competition.  
(Tick all that apply)

- ☐ Cramps  
☐ Dehydration/hypohydration  
☐ Diarrhoea  
☐ Nausea/vomiting  
☐ Stitches  
☐ Other (please specify)  
☐ Don't Know  
☐ I don't experience any conditions related to training or competition
- 

---

please specify the condition

---

---

Do you have another condition need to be specified?

- ☐ Yes   ☐ No
- 

---

please specify the second condition

---

---

Do you have another condition need to be specified?

- ☐ Yes   ☐ No
- 

---

please specify the third condition

---

---

Do you experience any vitamin or mineral deficiencies diagnosed by a blood test?

- ☐ Yes  
☐ No  
☐ Don't know
- 

Which vitamin or mineral deficiencies have been diagnosed by a blood test?  
(Tick all that apply)

- ☐ Calcium deficiency  
☐ Iron deficiency (e.g. low ferritin, low iron, low haemoglobin)  
☐ Vitamin D deficiency  
☐ Other (please specify)  
☐ Don't Know
- 

How is the calcium deficiency treated?

- ☐ no treatment   ☐ diet   ☐ exercise   ☐ natural/herbal therapy (please specify)   ☐ supplements (please specify)   ☐ other (please specify)   ☐ Don't know
- 

please specify the natural/herbal therapy

---

please specify the supplements

---

please specify the treatment

---

How is the iron deficiency (e.g. low ferritin, low iron, low haemoglobin) treated?

- ☐ no treatment   ☐ diet   ☐ exercise   ☐ natural/herbal therapy (please specify)   ☐ supplements (please specify)   ☐ other (please specify)   ☐ Don't know
- 

please specify the natural/herbal therapy

---

please specify the supplements

---

please specify the treatment

---

How is the vitamin D deficiency treated?

- ☐ no treatment   ☐ diet   ☐ exercise   ☐ natural/herbal therapy (please specify)   ☐ supplements (please specify)   ☐ other (please specify)   ☐ Don't know
- 

please specify the natural/herbal therapy

---

please specify the supplements

---

please specify the treatment

---

please specify the vitamin or mineral deficiency

---



---

How is the [sport\_deficiency\_other\_1] deficiency treated?

☐ no treatment   ☐ diet   ☐ exercise   ☐ natural/herbal therapy (please specify)   ☐ supplements (please specify)   ☐ other (please specify)   ☐ Don't know

---

please specify the natural/herbal therapy

---

---

please specify the supplements

---

---

please specify the treatment

---

---

Do you have another deficiency that needs to be specified?

☐ Yes   ☐ No

---

please specify the second vitamin or mineral deficiency

---

---

How is the [sport\_deficiency\_other\_2] deficiency treated?

☐ no treatment   ☐ diet   ☐ exercise   ☐ natural/herbal therapy (please specify)   ☐ supplements (please specify)   ☐ other (please specify)   ☐ Don't know

---

please specify the natural/herbal therapy

---

---

please specify the supplements

---

---

please specify the treatment

---

---

Do you have another deficiency that needs to be specified?

☐ Yes   ☐ No

---

please specify the third vitamin or mineral deficiency

---

---

How is the [sport\_deficiency\_other\_3] deficiency treated?

☐ no treatment   ☐ diet   ☐ exercise   ☐ natural/herbal therapy (please specify)   ☐ supplements (please specify)   ☐ other (please specify)   ☐ Don't know

---

please specify the natural/herbal therapy

---

---

please specify the supplements

---

---

please specify the treatment

---

---

Do you take \*sports foods or dietary supplements?

- ☐ Yes  
☐ No  
☐ Don't know
- 

\*For example, sports drink, sports gel, sports bars, sports confectionary, liquid meals, electrolyte replacement (salt tablets), whey protein, creatine, carnitine etc..

---

Which sports foods or dietary supplements do you take?  
(Tick all that apply)

- ☐ beta-alanine
- ☐ bicarbonate
- ☐ beetroot juice
- ☐ caffeine supplements (e.g. strips or tablets)
- ☐ caffeine containing foods taken to assist performance (e.g. coffee, chocolate milk)
- ☐ calcium supplement
- ☐ carnitine
- ☐ chondroitin sulphate
- ☐ creatine
- ☐ curcumin
- ☐ electrolyte replacement (e.g. salt tablets)
- ☐ exotic berries (e.g. acai, goji)
- ☐ fish oil capsules
- ☐ glucosamine
- ☐ glutamine
- ☐ HMB
- ☐ iron supplement
- ☐ liquid meals
- ☐ multivitamin/mineral supplement
- ☐ probiotics
- ☐ quercetin
- ☐ sports bars
- ☐ sports confectionery (e.g. chews)
- ☐ sports drink
- ☐ sports gel
- ☐ tart (Montmorency) cherry
- ☐ vitamin C supplement
- ☐ vitamin D supplement
- ☐ vitamin E supplement
- ☐ whey protein
- ☐ other anti-oxidants (e.g. vitamin A, selenium)
- ☐ don't know

**Please select the most important reason you use the dietary supplement/s you have selected.  
(Please select only one (1) reason for each supplement)**

|                                                         | sport performance     | health/medical reason<br>(please specify) | other reason (please specify) |
|---------------------------------------------------------|-----------------------|-------------------------------------------|-------------------------------|
| beta-alanine                                            | <input type="radio"/> | <input type="radio"/>                     | <input type="radio"/>         |
| bicarbonate                                             | <input type="radio"/> | <input type="radio"/>                     | <input type="radio"/>         |
| beetroot juice                                          | <input type="radio"/> | <input type="radio"/>                     | <input type="radio"/>         |
| caffeine supplements (e.g. strips or tablets)           | <input type="radio"/> | <input type="radio"/>                     | <input type="radio"/>         |
| caffeine containing foods (e.g. coffee, chocolate milk) | <input type="radio"/> | <input type="radio"/>                     | <input type="radio"/>         |
| calcium supplement                                      | <input type="radio"/> | <input type="radio"/>                     | <input type="radio"/>         |
| carnitine                                               | <input type="radio"/> | <input type="radio"/>                     | <input type="radio"/>         |
| chondroitin sulphate                                    | <input type="radio"/> | <input type="radio"/>                     | <input type="radio"/>         |
| creatine                                                | <input type="radio"/> | <input type="radio"/>                     | <input type="radio"/>         |
| curcumin                                                | <input type="radio"/> | <input type="radio"/>                     | <input type="radio"/>         |
| electrolyte replacement (e.g. salt tablets)             | <input type="radio"/> | <input type="radio"/>                     | <input type="radio"/>         |
| exotic berries (e.g. acai, goji)                        | <input type="radio"/> | <input type="radio"/>                     | <input type="radio"/>         |
| fish oil capsules                                       | <input type="radio"/> | <input type="radio"/>                     | <input type="radio"/>         |
| glucosamine                                             | <input type="radio"/> | <input type="radio"/>                     | <input type="radio"/>         |
| glutamine                                               | <input type="radio"/> | <input type="radio"/>                     | <input type="radio"/>         |
| HMB                                                     | <input type="radio"/> | <input type="radio"/>                     | <input type="radio"/>         |
| iron supplement                                         | <input type="radio"/> | <input type="radio"/>                     | <input type="radio"/>         |
| liquid meals                                            | <input type="radio"/> | <input type="radio"/>                     | <input type="radio"/>         |
| multivitamin/mineral supplement                         | <input type="radio"/> | <input type="radio"/>                     | <input type="radio"/>         |
| probiotics                                              | <input type="radio"/> | <input type="radio"/>                     | <input type="radio"/>         |
| quercetin                                               | <input type="radio"/> | <input type="radio"/>                     | <input type="radio"/>         |
| sports bars                                             | <input type="radio"/> | <input type="radio"/>                     | <input type="radio"/>         |
| sports confectionary (e.g. chews)                       | <input type="radio"/> | <input type="radio"/>                     | <input type="radio"/>         |
| sports drink                                            | <input type="radio"/> | <input type="radio"/>                     | <input type="radio"/>         |
| sports gel                                              | <input type="radio"/> | <input type="radio"/>                     | <input type="radio"/>         |
| tart (Montmorency) cherry                               | <input type="radio"/> | <input type="radio"/>                     | <input type="radio"/>         |
| vitamin C                                               | <input type="radio"/> | <input type="radio"/>                     | <input type="radio"/>         |
| vitamin D                                               | <input type="radio"/> | <input type="radio"/>                     | <input type="radio"/>         |
| vitamin E                                               | <input type="radio"/> | <input type="radio"/>                     | <input type="radio"/>         |
| whey protein                                            | <input type="radio"/> | <input type="radio"/>                     | <input type="radio"/>         |
| other anti-oxidants (e.g. vitamin A, selenium)          | <input type="radio"/> | <input type="radio"/>                     | <input type="radio"/>         |

please specify the reason for taking beta-alanine

\_\_\_\_\_

please specify the reason for taking bicarbonate

\_\_\_\_\_

---

please specify the reason for taking beetroot juice

---

---

please specify the reason for taking caffeine supplements (e.g. strips or tablets)

---

---

please specify the reason for taking caffeine foods (e.g.coffee, chocolate milk)

---

---

please specify the reason for taking the calcium supplement

---

---

please specify the reason for taking carnitine

---

---

please specify the reason for taking chondroitin sulphate

---

---

please specify the reason for taking creatine

---

---

please specify the reason for taking curcumin

---

---

please specify the reason for taking the electrolyte replacement (e.g. salt tablets)

---

---

please specify the reason for taking exotic berries (e.g. acai, goji)

---

---

please specify the reason for taking fish oil capsules

---

---

please specify the reason for taking glucosamine

---

---

please specify the reason for taking glutamine

---

---

please specify the reason for taking HMB

---

---

please specify the reason for taking the iron supplement

---

---

please specify the reason for taking the liquid meals

---

---

please specify the reason for taking the multivitamin/mineral supplement

---

---

please specify the reason for taking probiotics

---

---

please specify the reason for taking quercitin

---

---

please specify the reason for using sports bars

---

---

please specify the reason for using sports  
confectionery

---

---

please specify the reason for using sports drink

---

---

please specify the reason for using sports gel

---

---

please specify the reason for taking tart  
(Montmorency) cherry

---

---

please specify the reason for taking vitamin C

---

---

please specify the reason for taking vitamin D

---

---

please specify the reason for taking vitamin E

---

---

please specify the reason for taking whey protein

---

---

please specify the reason for taking other  
antioxidants (e.g. vitamin A, selenium)

---

---

How do you ensure that your supplements are safe (that is that they are not contaminated or banned)?  
(Tick all that apply)

- ☐ I check the ASADA/WADA prohibited substances list
- ☐ I check that third party testing has been done (e.g. by Informed Sport, HASTA, etc)
- ☐ I take the recommendation of a health or sport professional
- ☐ I take the recommendation of the supplement company (e.g. on the packet or website)
- ☐ I take the recommendation of other athlete/s
- ☐ I use an app (please specify)
- ☐ I don't take any measures to ensure they are safe.
- ☐ Don't Know

---

please specify the app you are using

---

---

Do you have any other comments about the testing of  
your supplements?

---

---

Which health or sport professional/s make recommendations to you about the safety of your supplements?  
(Tick all that apply)

- ☐ General practitioner (GP)
- ☐ Medical specialist
- ☐ Nurse
- ☐ Dietitian/Nutritionist (general)
- ☐ Sports Dietitian/Nutritionist
- ☐ Naturopath
- ☐ Exercise Physiologist
- ☐ Physiotherapist
- ☐ Personal trainer
- ☐ Coach
- ☐ Other (please specify)
- ☐ Don't Know

---

please specify the health or sport professional

\_\_\_\_\_

**This is a list of sources of nutrition information.**

**Please list in order of importance where you look for nutrition information (1 is the most important and 5 is the least important). Up to 5 options can be selected.**

|                                    | 1                     | 2                     | 3                     | 4                     | 5                     |
|------------------------------------|-----------------------|-----------------------|-----------------------|-----------------------|-----------------------|
| General practitioner (GP)          | <input type="radio"/> | <input type="radio"/> | <input type="radio"/> | <input type="radio"/> | <input type="radio"/> |
| Medical specialist                 | <input type="radio"/> | <input type="radio"/> | <input type="radio"/> | <input type="radio"/> | <input type="radio"/> |
| Nurse                              | <input type="radio"/> | <input type="radio"/> | <input type="radio"/> | <input type="radio"/> | <input type="radio"/> |
| Dietitian/Nutritionist (general)   | <input type="radio"/> | <input type="radio"/> | <input type="radio"/> | <input type="radio"/> | <input type="radio"/> |
| Sports Dietitian/Nutritionist      | <input type="radio"/> | <input type="radio"/> | <input type="radio"/> | <input type="radio"/> | <input type="radio"/> |
| Naturopath                         | <input type="radio"/> | <input type="radio"/> | <input type="radio"/> | <input type="radio"/> | <input type="radio"/> |
| Exercise Physiologist              | <input type="radio"/> | <input type="radio"/> | <input type="radio"/> | <input type="radio"/> | <input type="radio"/> |
| Physiotherapist                    | <input type="radio"/> | <input type="radio"/> | <input type="radio"/> | <input type="radio"/> | <input type="radio"/> |
| Personal trainer                   | <input type="radio"/> | <input type="radio"/> | <input type="radio"/> | <input type="radio"/> | <input type="radio"/> |
| Coach                              | <input type="radio"/> | <input type="radio"/> | <input type="radio"/> | <input type="radio"/> | <input type="radio"/> |
| Local health food/supplement store | <input type="radio"/> | <input type="radio"/> | <input type="radio"/> | <input type="radio"/> | <input type="radio"/> |
| Internet                           | <input type="radio"/> | <input type="radio"/> | <input type="radio"/> | <input type="radio"/> | <input type="radio"/> |
| Magazines                          | <input type="radio"/> | <input type="radio"/> | <input type="radio"/> | <input type="radio"/> | <input type="radio"/> |
| Other                              | <input type="radio"/> | <input type="radio"/> | <input type="radio"/> | <input type="radio"/> | <input type="radio"/> |
| Don't know                         | <input type="radio"/> | <input type="radio"/> | <input type="radio"/> | <input type="radio"/> | <input type="radio"/> |

please specify the source

\_\_\_\_\_

Are you interested in receiving education in nutrition, health, and performance?

- ☐ Yes  
☐ No  
☐ Don't know

**This is a list of sources of nutrition, health and performance education sources. Please list in order of importance where you look for nutrition information (1 is the most important and 5 is the least important). Up to 5 options can be selected.**

|                               | 1                     | 2                     | 3                     | 4                     | 5                     |
|-------------------------------|-----------------------|-----------------------|-----------------------|-----------------------|-----------------------|
| Consultation with a dietitian | <input type="radio"/> | <input type="radio"/> | <input type="radio"/> | <input type="radio"/> | <input type="radio"/> |
| Group education session       | <input type="radio"/> | <input type="radio"/> | <input type="radio"/> | <input type="radio"/> | <input type="radio"/> |
| Webinar                       | <input type="radio"/> | <input type="radio"/> | <input type="radio"/> | <input type="radio"/> | <input type="radio"/> |
| Face-to-face nutrition course | <input type="radio"/> | <input type="radio"/> | <input type="radio"/> | <input type="radio"/> | <input type="radio"/> |
| Online nutrition course       | <input type="radio"/> | <input type="radio"/> | <input type="radio"/> | <input type="radio"/> | <input type="radio"/> |
| Written materials             | <input type="radio"/> | <input type="radio"/> | <input type="radio"/> | <input type="radio"/> | <input type="radio"/> |
| Scientific journals           | <input type="radio"/> | <input type="radio"/> | <input type="radio"/> | <input type="radio"/> | <input type="radio"/> |
| Website information           | <input type="radio"/> | <input type="radio"/> | <input type="radio"/> | <input type="radio"/> | <input type="radio"/> |
| Nutrition Blog                | <input type="radio"/> | <input type="radio"/> | <input type="radio"/> | <input type="radio"/> | <input type="radio"/> |
| Other                         | <input type="radio"/> | <input type="radio"/> | <input type="radio"/> | <input type="radio"/> | <input type="radio"/> |

please specify the source

---
